# Supplementary material for: The association between neighborhood deprivation and DNA methylation in an autopsy cohort
Source: Aging (Albany NY). 2024 Apr 24;16(8):6694–716. doi: 10.18632/aging.205764 (PMC11087100; doi:10.18632/aging.205764)
Supplement: Supplementary EWAS Output [file aging-16-205764-s005.xlsx]

## Sheet: Supplemental EWAS Output
Supplementary EWAS Output. Epigenome-wide summary statistics (Effect Estimate, standard deviation (SD), P-Value, 95%-confidence interval (Lower CI, Upper CI)) for the association between DNA methylation and the Area Deprivation Index (ADI). Effect estimates can be interpreted per a 1-unit increase in ADI. All models were adjusted for the following covariates: race, sex, educational attainment, ag…
CpG	Effect Estimate	SD	P-Value	Lower CI	Upper CI
cg26928153	6.04383e-06	2.76945e-05	0.827164	-4.87063e-05	6.0794e-05
cg16269199	4.47164e-05	0.000109827	0.684505	-0.000172403	0.000261836
cg13869341	0.000142296	0.000119343	0.23517	-9.36371e-05	0.00037823
cg24669183	8.04583e-05	0.000103014	0.439056	-0.000123194	0.000284111
cg26679879	-0.000261865	0.000261449	0.316424	-0.000778732	0.000255001
cg22519184	-0.000291983	0.000261124	0.264896	-0.000808207	0.000224242
cg15560884	-1.12638e-05	5.51359e-05	0.837215	-0.000120264	9.77361e-05
cg01014490	-1.09127e-05	1.37083e-05	0.426605	-3.8013e-05	1.61876e-05
cg24063007	6.15948e-05	5.2146e-05	0.238959	-4.14943e-05	0.000164684
cg10692041	-8.65724e-06	3.42845e-05	0.80163	-7.64354e-05	5.91209e-05
cg09961319	-0.000105608	0.000155549	0.49554	-0.000413118	0.000201902
cg02339369	5.5134e-06	0.00010112	0.956092	-0.000194394	0.000205421
cg17505339	-1.48167e-06	3.86933e-05	0.969402	-7.79756e-05	7.50123e-05
cg09499020	-8.31365e-05	9.16528e-05	0.369901	-0.000264328	9.80548e-05
cg16535257	-0.00010331	0.000163685	0.533387	-0.000426904	0.000220285
cg15979415	-2.7954e-05	5.09182e-05	0.585939	-0.000128616	7.27077e-05
cg11954957	2.35074e-05	9.05332e-05	0.795845	-0.000155471	0.000202485
cg04747364	-1.04713e-05	3.24954e-05	0.749469	-7.47124e-05	5.37698e-05
cg26304905	-0.000130405	8.20113e-05	0.110246	-0.000292536	3.17257e-05
cg20434134	-9.54353e-06	1.75163e-05	0.587119	-4.41721e-05	2.50851e-05
cg16736630	0.000109435	0.000121217	0.366179	-0.000130203	0.000349074
cg00168193	-3.28892e-05	5.16506e-05	0.528072	-0.000134999	6.92206e-05
cg06325811	1.1409e-05	0.000112713	0.921127	-0.000211416	0.000234234
cg05898754	0.000259191	0.00016101	0.111481	-5.91152e-05	0.000577497
cg03128332	-3.38206e-05	8.05285e-05	0.678291	-0.00019302	0.000125379
cg16619049	-7.98442e-05	8.36043e-05	0.340847	-0.000245124	8.54358e-05
cg23100540	-9.73767e-05	6.15723e-05	0.118802	-0.000219101	2.43475e-05
cg17698174	-9.00901e-05	0.000108467	0.408764	-0.000304522	0.000124342
cg13832055	-7.21684e-05	6.5856e-05	0.272502	-0.000202361	5.80244e-05
cg05475702	5.34034e-07	8.72861e-05	0.995116	-0.000172025	0.000173093
cg18147296	-0.000129616	9.41475e-05	0.170527	-0.000315739	5.6507e-05
cg05597748	-0.000129689	6.08892e-05	0.0340481	-0.000250062	-9.31505e-06
cg00111697	-5.30093e-05	0.000110585	0.630749	-0.000271629	0.00016561
cg10988531	-4.64386e-05	6.90387e-05	0.498244	-0.000182923	9.00461e-05
cg05321646	-3.87162e-05	5.86496e-05	0.51192	-0.000154662	7.723e-05
cg13938959	-1.31327e-05	6.67936e-05	0.842395	-0.000145179	0.000118914
cg12445832	1.46684e-05	0.000127915	0.909261	-0.000238212	0.000267548
cg23999112	1.47156e-05	4.22895e-05	0.72782	-6.88878e-05	9.8319e-05
cg11527153	2.37995e-05	3.05087e-05	0.435607	-3.65142e-05	8.41132e-05
cg27573606	-2.17112e-05	1.13977e-05	0.0601734	-4.42436e-05	8.21282e-07
cg04195702	-6.16085e-05	3.39144e-05	0.0718555	-0.000128655	5.4379e-06
cg01062849	4.08075e-05	2.2885e-05	0.0810774	-4.43457e-06	8.60495e-05
cg08128007	-0.000256059	0.000192107	0.184908	-0.000635843	0.000123724
cg23733394	-1.30026e-05	0.000261863	0.960942	-0.000530688	0.000504682
cg13371836	2.60044e-08	5.6918e-06	0.996351	-1.12263e-05	1.12783e-05
cg04407431	-2.8811e-05	1.28732e-05	0.0274346	-5.42605e-05	-3.36158e-06
cg13924672	-0.000136185	6.71876e-05	0.0445826	-0.00026901	-3.35974e-06
cg10847807	-0.000139741	4.3357e-05	0.00149049	-0.000225455	-5.40271e-05
cg20501011	-0.000147421	0.00015383	0.344557	-0.000451532	0.000156691
cg13565718	8.20558e-05	7.31243e-05	0.262638	-6.25059e-05	0.000226617
cg01097950	-3.23281e-05	9.36816e-05	0.728988	-0.00021753	0.000152874
cg08900511	-0.000109132	7.20371e-05	0.130892	-0.000251544	3.32809e-05
cg04410003	1.18705e-05	4.18793e-05	0.778039	-7.0922e-05	9.4663e-05
cg12726839	0.000451379	0.000302817	0.137422	-0.000147269	0.00105003
cg04364728	0.000114914	0.000133318	0.393914	-0.000148646	0.000378475
cg05151709	3.68369e-05	0.000117153	0.756104	-0.000194766	0.00026844
cg08546707	3.56542e-06	0.000138913	0.979768	-0.000271056	0.000278187
cg01782097	5.51086e-05	0.000112556	0.628054	-0.000167406	0.000277623
cg20825023	-0.000122302	0.000145849	0.404425	-0.000410636	0.000166032
cg12549180	-3.44106e-05	7.4636e-05	0.649977	-0.000181961	0.00011314
cg11851804	-0.000121312	0.000140026	0.392435	-0.000398134	0.000155509
cg06623778	-0.000176262	0.000125255	0.163477	-0.000423883	7.13594e-05
cg08186992	-8.50703e-05	0.000136185	0.534516	-0.000354298	0.000184158
cg17436295	0.000100229	0.000113128	0.372413	-0.000123418	0.000323877
cg00613965	-2.38447e-05	6.2702e-05	0.70953	-0.000147802	0.000100113
cg18865112	0.000167817	0.000145894	0.253955	-0.000120606	0.000456241
cg21407818	-0.000102074	5.91762e-05	0.0844694	-0.000219061	1.49135e-05
cg22226438	4.9346e-06	0.000158892	0.975351	-0.000309184	0.000319053
cg08029603	-0.000160491	0.000113723	0.157481	-0.000385313	6.43311e-05
cg16347928	-3.95452e-05	3.54124e-05	0.266509	-0.000109553	3.04626e-05
cg22699361	-5.18743e-05	0.000150284	0.731233	-0.000348975	0.000245226
cg03890988	-8.78556e-05	9.98836e-05	0.37907	-0.000285319	0.000109607
cg21786289	-0.000182675	0.000135635	0.176532	-0.000450817	8.54661e-05
cg13897241	-8.41717e-05	0.000104626	0.422036	-0.00029101	0.000122667
cg12712429	-0.000144758	0.000136315	0.288049	-0.000414244	0.000124728
cg13176867	-6.04579e-06	0.000106188	0.95482	-0.000215973	0.000203881
cg15105996	7.98154e-06	0.000145608	0.956322	-0.000279875	0.000295838
cg02565062	-0.000111452	0.000103839	0.282996	-0.000316734	9.38298e-05
cg09856436	-7.22402e-05	6.60059e-05	0.275648	-0.000202729	5.8249e-05
cg19159092	7.25856e-05	0.000106498	0.492594	-0.000137954	0.000283125
cg27050229	-2.16042e-05	4.19862e-05	0.606772	-0.000104608	6.13998e-05
cg06931612	-3.3713e-05	7.04812e-05	0.633672	-0.00017305	0.000105623
cg11407801	3.25796e-05	5.19349e-05	0.533425	-7.00922e-05	0.000135251
cg01197763	-0.000136052	5.81554e-05	0.0204514	-0.000251021	-2.10827e-05
cg01789792	-0.000114405	9.08384e-05	0.208833	-0.000293986	6.51768e-05
cg16352085	-1.93753e-05	2.33524e-05	0.408831	-6.55414e-05	2.67909e-05
cg04839849	-1.44604e-06	1.25344e-05	0.908489	-2.62257e-05	2.33336e-05
cg03725447	-1.63306e-05	2.14236e-05	0.447454	-5.86836e-05	2.60224e-05
cg25215298	1.03507e-06	4.73875e-06	0.826984	-8.33312e-06	1.04033e-05
cg04672450	1.2485e-05	2.55674e-05	0.626003	-3.806e-05	6.303e-05
cg20341253	6.98836e-06	7.96702e-06	0.378308	-8.76189e-06	2.27386e-05
cg27487046	-3.03706e-05	1.77563e-05	0.0905881	-6.54737e-05	4.73241e-06
cg06091566	8.81159e-06	3.4978e-05	0.800026	-6.03375e-05	7.79607e-05
cg03735847	-9.54124e-07	4.18223e-06	0.819843	-9.22211e-06	7.31387e-06
cg27009105	-9.57942e-06	1.08618e-05	0.377598	-3.10524e-05	1.18935e-05
cg03180780	-3.57314e-06	8.03188e-06	0.655815	-1.94516e-05	1.23053e-05
cg04531633	8.44505e-06	1.08566e-05	0.440794	-1.30178e-05	2.99079e-05
cg09166659	-4.69622e-06	6.39968e-06	0.467882	-1.73479e-05	7.9555e-06
cg05527507	-4.61091e-05	7.14136e-05	0.51699	-0.000187289	9.50706e-05
cg14324200	1.01009e-05	6.52147e-05	0.877844	-0.000118824	0.000139026
cg13856810	-7.28452e-05	0.000186444	0.694327	-0.000441432	0.000295742
cg02896266	-6.1336e-05	0.000117702	0.604568	-0.000294025	0.000171353
cg13806162	-0.000104358	7.48e-05	0.164419	-0.000252232	4.35168e-05
cg23225454	7.60428e-06	0.000124132	0.951506	-0.000237796	0.000253005
cg00976181	-0.000101898	0.000104128	0.342836	-0.000307752	0.000103956
cg10711230	-1.11512e-05	5.00995e-05	0.824454	-0.000110194	8.78921e-05
cg00145911	6.90855e-05	8.43118e-05	0.413662	-9.75931e-05	0.000235764
cg13546858	-1.89632e-06	0.000168139	0.991045	-0.000334295	0.000330503
cg06531475	-2.74325e-05	9.42682e-05	0.771335	-0.000213794	0.000158929
cg14156792	-5.67443e-05	0.000133775	0.670753	-0.000321209	0.00020772
cg24997886	-0.000159694	0.000115029	0.167938	-0.000387098	6.77105e-05
cg01727431	5.92056e-06	0.000107271	0.955987	-0.000206147	0.000217988
cg10146935	-1.19449e-06	3.29443e-05	0.971138	-6.63231e-05	6.39341e-05
cg02439789	-3.56744e-05	0.000148316	0.810654	-0.000328884	0.000257535
cg24362661	-8.87823e-05	0.000112661	0.431718	-0.000311505	0.00013394
cg05819296	-0.000192509	0.000128769	0.135807	-0.000447076	6.20589e-05
cg00582671	-9.72586e-05	7.60579e-05	0.208806	-0.00024762	5.31026e-05
cg22485363	-0.000236599	0.000139058	0.0893286	-0.000511507	3.83087e-05
cg06036236	-9.46385e-05	0.000101683	0.358798	-0.000295659	0.000106382
cg03521652	-0.000224363	0.000143082	0.119171	-0.000507227	5.85015e-05
cg13904806	-0.000307965	0.000144182	0.0333895	-0.000593003	-2.2927e-05
cg03269716	-9.4335e-05	0.00014914	0.527105	-0.000389174	0.000200504
cg04121631	0.0001254	6.18517e-05	0.0422051	3.12386e-06	0.000247677
cg14183444	-1.2431e-05	3.22306e-05	0.69887	-7.61486e-05	5.12866e-05
cg23440882	-1.83045e-07	8.18558e-06	0.982092	-1.63654e-05	1.59993e-05
cg23112672	-0.000108462	6.59169e-05	0.100253	-0.000238775	2.18514e-05
cg15896339	1.71442e-05	3.74682e-05	0.64789	-5.69279e-05	9.12163e-05
cg21801539	4.44696e-05	2.07875e-05	0.0336666	3.37417e-06	8.5565e-05
cg02676653	-1.54135e-05	1.29593e-05	0.235875	-4.10331e-05	1.02062e-05
cg19669771	-5.14123e-05	7.05291e-05	0.466017	-0.000190843	8.80188e-05
cg12454161	-4.09061e-05	5.66559e-05	0.471257	-0.000152911	7.10987e-05
cg26477748	-6.48265e-05	4.72624e-05	0.168634	-0.000158261	2.8608e-05
cg09180262	3.45548e-05	3.29735e-05	0.297542	-3.06316e-05	9.97412e-05
cg24045482	1.22138e-05	1.07592e-05	0.257973	-9.05634e-06	3.34839e-05
cg09988062	-2.90661e-07	9.47946e-06	0.975536	-1.90309e-05	1.84496e-05
cg19724344	3.76986e-05	3.56466e-05	0.293309	-3.27724e-05	0.00010817
cg06838427	-7.96587e-06	4.3111e-05	0.854573	-9.31933e-05	7.72615e-05
cg10827460	0.000333211	0.000236638	0.160601	-0.000134605	0.000801028
cg15742605	0.000190927	0.0001745	0.276058	-0.000154048	0.000535902
cg09756115	9.88309e-06	0.00011243	0.930256	-0.000212382	0.000232149
cg23731742	0.000180273	0.000132678	0.17428	-8.2023e-05	0.000442569
cg24114126	-3.79436e-05	3.84251e-05	0.325823	-0.000113907	3.80202e-05
cg16952407	-3.0762e-05	1.9625e-05	0.117327	-6.95592e-05	8.03522e-06
cg06511482	-5.64893e-05	6.71013e-05	0.401449	-0.000189144	7.61653e-05
cg17153432	-6.96131e-05	4.4843e-05	0.126655	-0.000158265	1.90384e-05
cg00113194	3.15884e-06	6.58071e-05	0.961961	-0.000126937	0.000133255
cg02968844	-0.000141007	4.85837e-05	0.00424255	-0.000237054	-4.49606e-05
cg16248916	-8.08156e-05	5.61723e-05	0.159848	-0.000191864	3.02332e-05
cg20322444	-7.7898e-05	6.1498e-05	0.206886	-0.000199475	4.36793e-05
cg07983659	2.87042e-05	2.15097e-05	0.186761	-1.3819e-05	7.12274e-05
cg11733071	-1.59719e-05	3.51571e-05	0.652226	-8.5475e-05	5.35312e-05
cg01394461	-8.10161e-05	6.84257e-05	0.242018	-0.000216289	5.42569e-05
cg09555360	-7.99555e-05	4.49746e-05	0.0786955	-0.000168867	8.95622e-06
cg07701223	3.36285e-05	2.71855e-05	0.215519	-2.01153e-05	8.73724e-05
cg13060902	-8.94368e-05	4.88876e-05	0.0704829	-0.000186084	7.21066e-06
cg16608242	3.43814e-05	1.92311e-05	0.0740906	-3.63718e-06	7.24e-05
cg21830050	-2.02294e-05	8.62439e-05	0.814168	-0.000190728	0.000150269
cg15684274	-7.09598e-05	4.2995e-05	0.101092	-0.000155958	1.40384e-05
cg16005420	-3.22368e-05	4.47886e-05	0.471546	-0.000120781	5.63071e-05
cg02452688	-6.10244e-05	8.35403e-05	0.470998	-0.000226178	0.000104129
cg21362926	2.26191e-05	1.87353e-05	0.228897	-1.44193e-05	5.96575e-05
cg23430421	-4.45852e-05	4.68321e-05	0.343859	-0.000137169	4.79986e-05
cg24664590	3.69618e-06	1.36976e-05	0.787785	-2.33829e-05	3.07753e-05
cg08472719	-7.44267e-06	1.99015e-05	0.708046	-4.67866e-05	3.19013e-05
cg03161767	-6.43573e-07	1.25863e-05	0.959488	-2.55259e-05	2.42387e-05
cg10207527	1.93433e-05	2.98628e-05	0.518241	-3.96935e-05	7.83801e-05
cg04485075	-4.03704e-06	1.3062e-05	0.75661	-2.98596e-05	2.17856e-05
cg16389252	6.75878e-06	1.19177e-05	0.570531	-1.68017e-05	3.03193e-05
cg22114309	-8.52827e-05	5.67263e-05	0.132257	-0.000197427	2.68614e-05
cg17368944	8.74373e-06	1.2612e-05	0.491549	-1.61894e-05	3.36768e-05
cg11132698	-7.01066e-06	8.41428e-06	0.412205	-2.36451e-05	9.62379e-06
cg09789536	1.0008e-05	6.82626e-05	0.884623	-0.000124943	0.000144958
cg26866020	4.44563e-06	5.58447e-06	0.425766	-6.59448e-06	1.54857e-05
cg17505193	8.08779e-06	6.98078e-06	0.248428	-5.71273e-06	2.18883e-05
cg13802035	1.83163e-06	4.77466e-06	0.700592	-7.60754e-06	1.12708e-05
cg07582955	3.03615e-05	6.15781e-05	0.623344	-9.13741e-05	0.000152097
cg16968662	-0.000143165	5.67404e-05	0.0131108	-0.000255337	-3.09928e-05
cg07696918	-6.37767e-05	5.32258e-05	0.229559	-0.000169	4.1447e-05
cg04359978	5.12342e-05	9.68603e-05	0.59629	-0.000140252	0.00024272
cg07236207	-1.76648e-05	4.69501e-05	0.706474	-0.000110482	7.51523e-05
cg08198173	-0.000153997	5.76991e-05	0.00900114	-0.000268064	-3.99296e-05
cg01108617	-7.41364e-05	4.64755e-05	0.111958	-0.000166015	1.77424e-05
cg03148373	-5.94539e-06	2.434e-05	0.805872	-5.40639e-05	4.21731e-05
cg01930745	-4.93043e-05	4.38024e-05	0.264074	-0.000135899	3.72901e-05
cg14860707	-0.000143217	5.54462e-05	0.0108111	-0.00025283	-3.36033e-05
cg14997037	4.02233e-05	3.07771e-05	0.193951	-2.06209e-05	0.000101067
cg15648958	-1.08031e-05	1.17489e-05	0.359271	-3.40298e-05	1.24236e-05
cg03041482	-1.94827e-05	2.80596e-05	0.489553	-7.49547e-05	3.59893e-05
cg00328058	-9.71511e-06	8.87525e-05	0.913838	-0.000185173	0.000165743
cg02835406	-6.30051e-05	4.17555e-05	0.132839	-0.000145553	1.95426e-05
cg25742326	-0.000172501	0.00011805	0.145639	-0.000405879	6.08764e-05
cg12663811	-0.00013257	0.000100578	0.198084	-0.000331407	6.62666e-05
cg07390924	-2.28916e-05	7.28583e-05	0.755668	-0.000166927	0.000121144
cg10110857	3.52561e-05	7.59491e-05	0.64124	-0.00011489	0.000185402
cg10375192	2.80663e-05	6.25279e-05	0.654674	-9.55471e-05	0.00015168
cg02056921	2.09363e-06	7.45707e-05	0.977826	-0.000145328	0.000149515
cg21832150	4.36401e-05	0.000134854	0.746065	-0.000222957	0.000310237
cg24076968	4.22664e-05	9.89859e-05	0.672335	-0.000153422	0.000237955
cg12536471	9.06711e-05	8.29575e-05	0.281703	-7.33302e-05	0.000254672
cg06324192	1.55533e-05	8.86956e-05	0.860501	-0.000159792	0.000190898
cg23493227	-6.91701e-05	5.4632e-05	0.206047	-0.000177174	3.88337e-05
cg23207077	-1.03577e-05	5.33258e-05	0.845005	-0.000115779	9.50637e-05
cg24396605	8.03222e-05	7.30398e-05	0.26871	-6.40724e-05	0.000224717
cg22381068	-0.000204764	0.00013497	0.130773	-0.000471592	6.20627e-05
cg04865998	3.22529e-06	6.76766e-05	0.962155	-0.000130567	0.000137017
cg07195057	3.69677e-05	4.2868e-05	0.390645	-4.77794e-05	0.000121715
cg26679367	-0.000181324	0.00012524	0.150968	-0.000428914	6.6266e-05
cg06818851	-6.61516e-05	7.80196e-05	0.400305	-0.000220391	8.80877e-05
cg10175834	6.93877e-05	6.9262e-05	0.318997	-6.75385e-05	0.000206314
cg20691282	-6.36888e-05	6.65906e-05	0.337163	-0.000195334	6.79562e-05
cg23956473	-4.32784e-05	5.3453e-05	0.422761	-0.000148951	6.23946e-05
cg16352072	-0.000165531	9.59917e-05	0.0867483	-0.0003553	2.42383e-05
cg25107893	0.000172798	0.000120663	0.152149	-6.57459e-05	0.000411341
cg05505459	0.000116015	0.000330842	0.726198	-0.000538037	0.000770067
cg23635910	0.000244273	0.000287382	0.395361	-0.000323862	0.000812408
cg08843537	-7.13042e-05	4.54049e-05	0.120624	-0.000161067	1.84583e-05
cg22348654	-3.66778e-05	6.91667e-05	0.605105	-0.000173416	0.00010006
cg18166741	6.14859e-05	6.46383e-05	0.340594	-6.62995e-05	0.000189271
cg22699004	-1.10738e-05	2.64523e-05	0.676099	-6.33682e-05	4.12205e-05
cg09582238	-0.0001258	0.000148057	0.403561	-0.000418498	0.000166898
cg10824915	-0.000149374	6.72524e-05	0.0267961	-0.000282327	-1.64209e-05
cg22599150	3.51905e-05	6.69451e-05	0.597078	-9.71554e-05	0.000167536
cg20869814	-0.000260591	9.45493e-05	0.00649727	-0.000447508	-7.36732e-05
cg22579372	1.01602e-05	7.04855e-05	0.885612	-0.000129185	0.000149505
cg22583825	-3.39259e-08	7.20235e-05	0.999624	-0.000142419	0.000142352
cg15526941	0.000214822	0.000109463	0.0525147	-1.57915e-06	0.000431222
cg10201533	-4.88462e-05	0.000110224	0.660087	-0.000266751	0.000169058
cg11235921	5.27502e-05	9.0254e-05	0.558226	-0.000125676	0.000231176
cg11782208	-0.000145283	9.75132e-05	0.136631	-0.00033806	4.74942e-05
cg11143486	-4.26219e-06	0.00013653	0.975308	-0.000274173	0.000265649
cg12199972	-0.000220953	7.68792e-05	0.00455427	-0.000372938	-6.8968e-05
cg00380574	-0.000125202	0.000134397	0.352783	-0.000390895	0.000140491
cg10381813	-0.000109575	0.000133676	0.415191	-0.000373845	0.000154694
cg15628028	-0.000151768	0.000104192	0.148551	-0.000357748	5.42119e-05
cg14350158	0.000114346	8.15235e-05	0.166277	-4.68201e-05	0.000275513
cg03394722	1.23985e-05	0.000111782	0.911853	-0.000208587	0.000233384
cg26114254	3.10897e-05	2.67382e-05	0.255455	-2.17699e-05	8.39494e-05
cg03801109	-7.1825e-07	5.52552e-05	0.989919	-0.000109954	0.000108517
cg10010734	-7.40525e-05	3.93094e-05	0.0623004	-0.000151764	3.6594e-06
cg04983030	1.85434e-05	3.39447e-05	0.58395	-4.85631e-05	8.56498e-05
cg03648020	6.7389e-05	0.00021001	0.747935	-0.000347786	0.000482564
cg01729262	-5.6122e-05	7.60417e-05	0.466697	-0.000206451	9.42073e-05
cg15882305	2.0861e-05	5.31432e-05	0.694082	-8.41995e-05	0.000125922
cg15713103	-5.04913e-05	9.71445e-05	0.606707	-0.000242539	0.000141557
cg23552821	-8.89196e-06	5.93221e-05	0.881772	-0.000126168	0.000108384
cg05095110	-3.88065e-06	4.08455e-05	0.92452	-8.46294e-05	7.68681e-05
cg15578015	1.36565e-05	8.11974e-06	0.0963476	-2.39562e-06	2.97087e-05
cg23205003	-4.62549e-06	8.42265e-06	0.580852	-2.12765e-05	1.20255e-05
cg17907238	1.32801e-07	5.01455e-06	0.979153	-9.78061e-06	1.00462e-05
cg02397514	3.47715e-06	5.94135e-06	0.56464	-8.26849e-06	1.52228e-05
cg00447632	-2.6932e-05	2.36933e-05	0.258034	-7.3772e-05	1.99081e-05
cg26339484	-1.02172e-07	1.02778e-05	0.992104	-2.04208e-05	2.02164e-05
cg27430493	7.52236e-05	2.48513e-05	0.00337754	2.60943e-05	0.000124353
cg25066040	-1.73686e-06	1.48755e-05	0.906956	-3.11448e-05	2.76711e-05
cg27060622	-1.8752e-05	2.22617e-05	0.3992	-6.27619e-05	2.52579e-05
cg08122545	-1.96552e-06	7.97853e-06	0.804208	-1.77385e-05	1.38075e-05
cg15825501	2.52561e-05	2.72333e-05	0.359623	-2.85824e-05	7.90946e-05
cg13468764	3.81635e-07	5.15235e-05	0.994153	-0.000101477	0.00010224
cg26321643	-3.92984e-05	2.9479e-05	0.182431	-9.75764e-05	1.89796e-05
cg16578267	3.94315e-05	2.32502e-05	0.0961092	-6.53243e-06	8.53955e-05
cg18977839	0.000320604	0.000215379	0.140791	-0.000105185	0.000746393
cg09332175	-1.75662e-05	4.70299e-05	0.714241	-0.000110541	7.54087e-05
cg16034521	-8.54194e-05	6.37996e-05	0.185857	-0.000211547	4.07081e-05
cg10176463	7.0275e-05	7.72957e-05	0.361289	-8.25333e-05	0.000223083
cg25350899	2.57218e-05	8.01821e-05	0.749073	-0.000132793	0.000184236
cg06771789	-3.30853e-05	6.51915e-05	0.610042	-0.000161964	9.57937e-05
cg13219080	1.66348e-05	4.43109e-05	0.708519	-7.09647e-05	0.000104234
cg09364122	2.50455e-05	1.82847e-05	0.172181	-1.11021e-05	6.11931e-05
cg17142931	-0.000182025	7.90499e-05	0.0227458	-0.000338301	-2.57484e-05
cg17006413	-9.13423e-05	4.23263e-05	0.0326751	-0.000175018	-7.66609e-06
cg21472517	-8.91818e-05	5.71067e-05	0.122883	-0.000202078	2.37143e-05
cg18019572	-0.000195867	0.000106452	0.0656847	-0.000406316	1.45825e-05
cg22673826	-0.000204595	9.18723e-05	0.0277186	-0.00038622	-2.29699e-05
cg01922485	-0.000168469	7.10715e-05	0.0221054	-0.000308972	-2.79651e-05
cg26155170	-7.40928e-05	6.39769e-05	0.246708	-0.000200571	5.23851e-05
cg03125763	-0.000128721	9.61742e-05	0.183395	-0.000318851	6.14089e-05
cg26155520	2.33194e-05	9.49108e-05	0.805475	-0.000164313	0.000210951
cg23691733	-2.91117e-05	3.60824e-05	0.41901	-0.000100444	4.22207e-05
cg04985032	-1.70141e-05	2.79427e-05	0.540597	-7.2255e-05	3.82268e-05
cg24004483	-5.61417e-05	3.26341e-05	0.08896	-0.000120657	8.37377e-06
cg23281018	-3.62545e-05	3.21276e-05	0.263078	-9.97686e-05	2.72597e-05
cg25552017	-5.2679e-05	6.63178e-05	0.426726	-0.000183785	7.84266e-05
cg10984178	-6.53644e-05	2.94361e-05	0.0288801	-0.000123558	-7.17112e-06
cg26420561	-1.39248e-05	3.37096e-05	0.68071	-8.05664e-05	5.27169e-05
cg22020633	-6.80609e-05	2.86191e-05	0.0179171	-0.000124639	-1.1483e-05
cg01768082	-8.27355e-05	6.04523e-05	0.174016	-0.000202246	3.67746e-05
cg07589034	-1.9395e-05	3.87865e-05	0.619006	-9.60734e-05	5.72833e-05
cg22367159	-6.70868e-05	4.47259e-05	0.135097	-0.000155507	2.13332e-05
cg26837773	-0.000102749	6.56168e-05	0.118506	-0.000232469	2.6971e-05
cg15825373	-9.30862e-05	6.88135e-05	0.176861	-0.000229126	4.29534e-05
cg22618402	1.28242e-05	1.8842e-05	0.494106	-2.44251e-05	5.00736e-05
cg06538872	-6.92417e-05	8.18782e-05	0.399431	-0.000231109	9.26258e-05
cg22182593	-3.49368e-05	4.32058e-05	0.416869	-0.000120352	5.0478e-05
cg25610492	5.56981e-05	9.33898e-05	0.559673	-0.000128927	0.000240323
cg08469540	4.5094e-06	4.52989e-05	0.922046	-8.50433e-05	9.40621e-05
cg20022511	2.11882e-05	2.07032e-05	0.310239	-1.97406e-05	6.21171e-05
cg21503301	6.10638e-07	7.68995e-06	0.936644	-1.45919e-05	1.58131e-05
cg22115423	8.05712e-06	2.03456e-05	0.692877	-3.21646e-05	4.82789e-05
cg23684711	2.27469e-05	3.25114e-05	0.486905	-4.1526e-05	8.70197e-05
cg08067365	-1.48966e-05	1.71685e-05	0.385805	-4.88375e-05	1.90444e-05
cg20062691	-0.000169181	9.62837e-05	0.0811022	-0.000359528	2.11648e-05
cg03811829	-9.88323e-05	0.000119329	0.408903	-0.000334737	0.000137072
cg11211792	4.77175e-05	7.06674e-05	0.501637	-9.19872e-05	0.000187422
cg04788999	7.66381e-05	9.20065e-05	0.402752	-0.000105253	0.000258529
cg16526047	1.97508e-06	8.22992e-05	0.981023	-0.000160725	0.000164675
cg07123796	-0.000195074	0.000167485	0.249024	-0.000526181	0.000136033
cg09363892	-6.43172e-05	8.4376e-05	0.444673	-0.000231123	0.000102488
cg03185752	-0.000149441	7.56638e-05	0.0515474	-0.000299023	1.41453e-07
cg15153791	-2.8028e-06	8.42763e-06	0.737936	-1.94636e-05	1.3858e-05
cg04336684	5.67166e-05	3.0796e-05	0.0666072	-4.16503e-06	0.000117598
cg22482746	-1.43459e-06	6.55087e-06	0.826978	-1.43852e-05	1.1516e-05
cg25177113	1.66314e-05	7.46541e-06	0.0284153	1.87279e-06	3.139e-05
cg08223393	-6.33676e-05	3.65151e-05	0.0848485	-0.000135555	8.82029e-06
cg07008945	-6.9805e-07	4.22493e-06	0.868848	-9.05045e-06	7.65435e-06
cg11726631	-6.84726e-06	1.09104e-05	0.532358	-2.84163e-05	1.47218e-05
cg19813362	-1.86423e-06	6.88481e-06	0.785702	-1.5475e-05	1.17466e-05
cg00299257	-2.11628e-06	1.17225e-05	0.858301	-2.52908e-05	2.10582e-05
cg10046671	9.9756e-06	4.15053e-06	0.0181031	1.77028e-06	1.81809e-05
cg24704476	-0.000100595	8.06335e-05	0.212279	-0.000260002	5.88119e-05
cg17801765	5.78011e-05	8.62154e-05	0.512861	-0.000112641	0.000228243
cg13100600	-7.97394e-05	9.27963e-05	0.393514	-0.000263191	0.000103713
cg18272461	3.49001e-05	0.000119628	0.76821	-0.000201597	0.000271397
cg07787977	-0.000126007	0.000106869	0.239219	-0.00033728	8.52656e-05
cg02632261	-8.25361e-05	6.95803e-05	0.234493	-0.000220092	5.50194e-05
cg25774148	9.26301e-05	0.000127293	0.467165	-0.000159019	0.000344279
cg17021880	-9.32477e-05	0.000104355	0.374026	-0.00029955	0.000113054
cg02288964	-7.83406e-05	0.000138667	0.573217	-0.000352475	0.000195794
cg02341264	-0.000216135	0.00014519	0.140512	-0.000503166	7.08962e-05
cg06712559	-0.000130139	0.00014891	0.382816	-0.000424523	0.000164245
cg17928920	-4.5442e-05	6.96446e-05	0.513442	-0.000183125	9.22405e-05
cg14663984	-2.32032e-05	5.11547e-05	0.647208	-0.000124332	7.79262e-05
cg16318112	4.07765e-05	9.10312e-05	0.656584	-0.000139186	0.000220739
cg09248054	3.34921e-06	5.36316e-05	0.950063	-0.000102677	0.000109375
cg15840462	-0.000158275	8.01159e-05	0.0515632	-0.000316658	1.08909e-07
cg24598973	-0.000205876	9.32226e-05	0.0275134	-0.000390171	-2.15812e-05
cg16502826	-0.00015681	8.09935e-05	0.056928	-0.000316928	3.30891e-06
cg18147233	-0.000143497	0.000107262	0.180185	-0.000355546	6.85521e-05
cg20741620	-0.000178908	6.46434e-05	0.00658409	-0.000306704	-5.11125e-05
cg00525597	-6.79691e-05	7.01305e-05	0.33878	-0.000206612	7.06741e-05
cg26007962	-2.89738e-05	5.83381e-05	0.619589	-0.000144304	8.63566e-05
cg27541454	-9.82625e-05	0.000144337	0.498717	-0.000383606	0.000187081
cg25759916	-4.89505e-05	5.75384e-05	0.395938	-0.0001627	6.4799e-05
cg01150641	-6.5722e-05	6.11059e-05	0.285328	-0.000186524	5.50801e-05
cg23625715	1.60203e-05	1.38482e-05	0.253157	-1.13566e-05	4.33972e-05
cg26222311	-3.6205e-05	7.20785e-05	0.615526	-0.000178699	0.000106289
cg20594982	-0.00019763	0.000141974	0.163757	-0.000478303	8.30427e-05
cg06819605	1.03695e-05	1.18488e-05	0.381029	-1.30548e-05	3.37938e-05
cg14248627	1.04678e-07	4.84544e-05	0.998308	-9.56863e-05	9.58957e-05
cg03790440	2.07366e-05	5.571e-05	0.712557	-8.93982e-05	0.000130871
cg15475967	-5.07623e-05	3.30494e-05	0.127207	-0.000116099	1.45741e-05
cg02138082	0.000129571	0.000381577	0.734728	-0.000624781	0.000883923
cg10983617	-4.4729e-06	1.26753e-05	0.725095	-2.95311e-05	2.05853e-05
cg24934837	-6.07677e-05	5.44657e-05	0.266862	-0.000168443	4.69073e-05
cg04029236	1.439e-05	4.4042e-05	0.744976	-7.2678e-05	0.000101458
cg16657578	-2.55928e-05	1.18956e-05	0.0322332	-4.91096e-05	-2.07607e-06
cg09134969	-0.000122813	6.64116e-05	0.0692073	-0.000254104	8.4786e-06
cg02635644	-1.57102e-06	1.03058e-05	0.879739	-2.19449e-05	1.88028e-05
cg01711077	-2.04191e-05	6.60501e-05	0.758588	-0.000150996	0.000110157
cg11471767	-7.34149e-05	6.9407e-05	0.294476	-0.000210628	6.37979e-05
cg07501049	1.48852e-05	1.46421e-05	0.312862	-1.40614e-05	4.38317e-05
cg14253035	-4.84424e-05	5.27893e-05	0.360117	-0.000152803	5.59184e-05
cg12469361	9.60244e-06	1.94318e-05	0.621803	-2.88129e-05	4.80178e-05
cg24685837	-0.000116514	4.87163e-05	0.0178166	-0.000212823	-2.02051e-05
cg20988802	-8.22259e-05	5.06587e-05	0.110548	-0.000182375	1.79228e-05
cg02245706	-2.91833e-05	7.04499e-05	0.679555	-0.000168458	0.000110091
cg22379708	2.95873e-05	2.45201e-05	0.225895	-1.88873e-05	7.80619e-05
cg16026189	-2.57875e-05	4.0993e-05	0.528481	-0.000106828	5.52528e-05
cg18380070	-2.75078e-05	3.90154e-05	0.484184	-0.000104639	4.96231e-05
cg02494066	-6.39062e-05	6.71664e-05	0.344276	-0.00019669	6.88772e-05
cg09792712	7.46469e-05	7.74135e-05	0.336309	-7.83942e-05	0.000227688
cg15469001	-2.27667e-05	6.0473e-05	0.706817	-0.000142318	9.67842e-05
cg02742603	-9.49853e-05	4.78991e-05	0.0472415	-0.000189678	-2.9206e-07
cg08387293	-0.000137777	8.10655e-05	0.089101	-0.000298037	2.24844e-05
cg24730157	-5.04166e-05	3.20021e-05	0.121687	-0.000113682	1.28493e-05
cg10309261	1.73254e-06	3.00566e-05	0.954225	-5.76874e-05	6.11525e-05
cg23801338	-5.03171e-06	1.83723e-05	0.782788	-4.13524e-05	3.1289e-05
cg13244315	2.67872e-05	1.42809e-05	0.0622399	-1.44521e-06	5.50197e-05
cg11708842	-4.05774e-05	5.15984e-05	0.433727	-0.000142584	6.14291e-05
cg11853970	-0.000175012	7.68785e-05	0.0241787	-0.000326996	-2.30287e-05
cg08480609	-2.64127e-05	4.65276e-05	0.569447	-0.000118395	6.55692e-05
cg03120284	-8.31383e-10	6.44823e-05	0.99999	-0.000127478	0.000127476
cg27561293	6.0885e-06	3.66991e-06	0.100335	-1.16667e-06	1.33437e-05
cg04391811	-4.29321e-06	5.06089e-06	0.401461	-1.42982e-05	5.71183e-06
cg12147785	-9.03203e-05	4.06852e-05	0.028508	-0.000170752	-9.8885e-06
cg10490668	1.44403e-05	2.10385e-05	0.492989	-2.71512e-05	5.60319e-05
cg22627753	-0.000132124	0.000107125	0.221147	-0.000343902	7.96538e-05
cg04559824	-5.41441e-05	4.74092e-05	0.252552	-0.000147869	3.95807e-05
cg07912402	1.56091e-05	6.476e-06	0.0165978	2.80645e-06	2.84117e-05
cg04274259	-8.94438e-05	4.66876e-05	0.0580876	-0.000181742	2.85442e-06
cg16903000	-6.47863e-05	2.86395e-05	0.0253601	-0.000121405	-8.16807e-06
cg01757980	-0.000137977	5.627e-05	0.0157026	-0.000249219	-2.67348e-05
cg12483930	-0.000146699	7.17313e-05	0.0414683	-0.000288507	-4.89134e-06
cg02415349	-2.15844e-05	5.12876e-05	0.674886	-0.000122976	7.98075e-05
cg14252395	-0.00010148	4.37713e-05	0.0212724	-0.000188013	-1.49474e-05
cg02096324	-4.15131e-06	4.63125e-05	0.929503	-9.5708e-05	8.74054e-05
cg08262378	-5.62808e-05	6.90841e-05	0.416605	-0.000192855	8.02937e-05
cg13439946	-0.000174336	0.000128133	0.173216	-0.000427647	7.89744e-05
cg12184864	2.55374e-05	3.51143e-05	0.467815	-4.38812e-05	9.4956e-05
cg21607076	-1.29755e-05	2.37881e-05	0.581331	-6.0003e-05	3.4052e-05
cg12647165	1.7522e-06	9.04217e-06	0.846814	-1.61236e-05	1.9628e-05
cg02482614	2.39152e-06	1.11777e-05	0.830249	-1.97061e-05	2.44891e-05
cg17098415	1.53003e-05	1.07442e-05	0.157288	-5.94032e-06	3.6541e-05
cg11308274	2.91906e-06	5.77146e-06	0.613262	-8.49072e-06	1.43288e-05
cg08459564	1.90627e-05	5.2544e-05	0.718471	-8.48132e-05	0.000122939
cg04919596	-6.10465e-05	0.000105787	0.568593	-0.000270179	0.000148086
cg24678117	-0.000187389	7.84902e-05	0.0186192	-0.000342559	-3.22192e-05
cg22169680	-0.000120978	4.92208e-05	0.0149676	-0.000218284	-2.36716e-05
cg10720997	-0.000182277	0.00013495	0.182631	-0.000449063	8.45093e-05
cg09908510	-0.000100848	7.63616e-05	0.1937	-0.00025181	5.01133e-05
cg09123721	-0.000185901	9.23644e-05	0.0456411	-0.000368499	-3.30282e-06
cg11405655	-0.000114358	8.44795e-05	0.176153	-0.000281368	5.26526e-05
cg25523405	-2.64609e-06	0.0001017	0.979235	-0.0002037	0.000198407
cg02105666	-0.000158287	0.00019345	0.414192	-0.000540724	0.00022415
cg21139076	-8.98297e-06	9.62149e-05	0.926169	-0.000199193	0.000181227
cg07549208	-9.11397e-05	0.00013982	0.514298	-0.000367554	0.000185275
cg21779088	2.39948e-05	3.12211e-05	0.443798	-3.77272e-05	8.57169e-05
cg04891761	-0.000140331	9.06368e-05	0.123265	-0.000319513	3.88523e-05
cg15500259	-5.00632e-07	8.42672e-05	0.9953	-0.000167091	0.00016609
cg10955566	0.000261581	0.000251858	0.30064	-0.000236325	0.000759487
cg08709360	0.000260521	0.000246648	0.291614	-0.000227086	0.000748128
cg01244934	0.000170123	0.000200549	0.397668	-0.000226348	0.000566594
cg15899727	0.000144777	0.000142699	0.312956	-0.000137328	0.000426883
cg18432292	-1.36585e-05	8.16321e-05	0.866848	-0.00017504	0.000147723
cg24475622	4.3271e-05	0.000123222	0.728203	-0.00020033	0.000286872
cg07147720	-4.84774e-06	1.1996e-05	0.687659	-2.8563e-05	1.88675e-05
cg24047311	4.8535e-06	5.90708e-06	0.412027	-6.82439e-06	1.65314e-05
cg16095440	1.32636e-06	5.2264e-06	0.800123	-9.00587e-06	1.16586e-05
cg08750554	7.08402e-06	5.95813e-05	0.906073	-0.000110704	0.000124872
cg26702212	-0.000111084	8.40945e-05	0.186326	-0.000277333	5.51651e-05
cg24517686	-0.000100632	7.14561e-05	0.160384	-0.000241896	4.06321e-05
cg27222785	-7.94252e-05	6.0274e-05	0.190991	-0.000198583	3.97324e-05
cg09864227	2.20723e-06	7.36385e-05	0.976391	-0.000143371	0.000147785
cg26111997	-4.58294e-05	6.46466e-05	0.479493	-0.000173631	8.19724e-05
cg07181843	8.96322e-06	6.90095e-05	0.895662	-0.000127464	0.00014539
cg25646531	2.9922e-05	0.000101317	0.767875	-0.000170374	0.000230218
cg00478379	2.99776e-05	8.0748e-05	0.712287	-0.000129656	0.000189611
cg10782557	7.14946e-05	8.50419e-05	0.401035	-9.66275e-05	0.000239617
cg13754917	0.000130728	9.24548e-05	0.157895	-5.20485e-05	0.000313505
cg10168544	0.000143393	7.51114e-05	0.0589975	-5.09665e-06	0.000291883
cg22044028	0.000138958	8.06777e-05	0.0848282	-2.05364e-05	0.000298452
cg15576492	0.000317501	0.000141264	0.0262529	3.82313e-05	0.000596772
cg11200797	8.15374e-05	0.000158756	0.611129	-0.000232311	0.000395386
cg16383573	3.04083e-05	4.53985e-05	0.507038	-5.93413e-05	0.000120158
cg00305285	-7.47095e-05	0.000155087	0.630384	-0.000381305	0.000231886
cg24378253	-2.42659e-06	5.68225e-06	0.669581	-1.366e-05	8.80684e-06
cg04794393	0.000144302	6.25767e-05	0.0237336	2.05918e-05	0.000268011
cg17840536	-1.14152e-05	9.77733e-06	0.245679	-3.07443e-05	7.91395e-06
cg19758750	1.42619e-05	4.98224e-05	0.774366	-8.42336e-05	0.000112757
cg16632098	7.5113e-07	5.90595e-05	0.98988	-0.000116006	0.000117508
cg18024260	-2.05321e-06	7.86834e-06	0.795349	-1.76084e-05	1.3502e-05
cg12924059	-3.1031e-05	2.72169e-05	0.255918	-8.48369e-05	2.27749e-05
cg15099245	-0.000117805	5.56464e-05	0.0365135	-0.000227814	-7.79595e-06
cg08039585	-9.11284e-06	3.03032e-05	0.766399	-6.90202e-05	5.07945e-05
cg19734301	-0.000105143	4.42393e-05	0.0179441	-0.000192601	-1.7685e-05
cg08470135	-4.35399e-05	3.37121e-05	0.198125	-0.000110186	2.31066e-05
cg05035248	3.97905e-06	4.33943e-06	0.363026	-4.5997e-06	1.25578e-05
cg05041517	2.75879e-05	5.61173e-05	0.624513	-8.33521e-05	0.000138528
cg15207999	1.72094e-05	2.9472e-05	0.562904	-4.10546e-05	7.54735e-05
cg26338735	5.80074e-05	3.23956e-05	0.0790214	-6.03647e-06	0.000122051
cg24437834	-9.78444e-05	6.22388e-05	0.118673	-0.000220886	2.51974e-05
cg15565004	-0.000132314	6.20464e-05	0.0352111	-0.000254976	-9.65306e-06
cg19999567	-9.17674e-05	0.000107132	0.393866	-0.00030356	0.000120025
cg19856606	-5.04357e-05	0.00011869	0.674721	-0.000285079	0.000184207
cg12743165	-0.000180227	0.000100291	0.0751663	-0.000378495	1.80407e-05
cg04065236	-8.13e-05	8.68859e-05	0.356642	-0.000253067	9.04674e-05
cg04315086	-5.99103e-05	0.000107475	0.581456	-0.00027238	0.00015256
cg09358422	-7.96085e-05	8.83932e-05	0.371151	-0.000254356	9.51387e-05
cg24523322	-0.000102828	7.864e-05	0.198604	-0.000258294	5.26377e-05
cg12612065	-0.00015741	0.000105951	0.142733	-0.000366867	5.20476e-05
cg16060740	4.08913e-05	5.05162e-05	0.415314	-5.89757e-05	0.000140758
cg13870982	-0.000124711	7.70828e-05	0.110673	-0.000277098	2.76763e-05
cg14010231	-2.13431e-05	3.84881e-05	0.576879	-9.74314e-05	5.47452e-05
cg22343299	2.7436e-06	8.00412e-06	0.732554	-1.308e-05	1.85672e-05
cg17596279	-2.4103e-05	5.11806e-05	0.638652	-0.000125283	7.70775e-05
cg15322667	-1.01731e-05	4.28668e-05	0.813512	-9.49179e-05	7.45716e-05
cg00648573	1.9032e-05	2.34059e-05	0.416122	-2.72399e-05	6.53039e-05
cg11144217	1.50168e-05	7.37208e-06	0.0438919	4.42656e-07	2.95909e-05
cg10782633	4.02564e-06	3.52711e-06	0.250327	-2.94722e-06	1.09985e-05
cg27169685	-6.28457e-05	4.89009e-05	0.196665	-0.000159519	3.3828e-05
cg06727198	-4.5867e-05	5.45166e-05	0.401005	-0.000153643	6.19087e-05
cg06375409	9.69284e-05	4.78916e-05	0.0456016	2.25e-06	0.000191607
cg19307389	-6.29549e-07	6.77365e-05	0.992559	-0.00013454	0.000133281
cg06444226	-2.70914e-06	8.21443e-05	0.973538	-0.000165103	0.000159685
cg06181703	7.9065e-07	3.19505e-05	0.980116	-6.23733e-05	6.39546e-05
cg23812948	2.96998e-05	4.74043e-05	0.529479	-6.40152e-05	0.000123415
cg17539962	2.80608e-05	5.47273e-05	0.61573	-8.01313e-05	0.000136253
cg24165743	-2.71394e-05	3.60521e-05	0.453168	-9.84119e-05	4.41332e-05
cg05007472	-1.64628e-05	6.89409e-06	0.0186701	-3.0092e-05	-2.83368e-06
cg19860160	-5.44775e-05	5.25803e-05	0.301883	-0.000158425	4.94701e-05
cg26405545	1.90605e-05	4.44296e-05	0.666548	-6.87739e-05	0.000106895
cg20961824	-1.84954e-05	0.000133366	0.891233	-0.000282151	0.000245161
cg11754357	-7.49948e-05	8.22148e-05	0.362527	-0.000237528	8.75383e-05
cg05527091	-6.12572e-05	0.000113435	0.590334	-0.00028551	0.000162996
cg24709745	1.22544e-05	2.49856e-05	0.623915	-3.71404e-05	6.16492e-05
cg08927102	1.85521e-05	1.53538e-05	0.228639	-1.18014e-05	4.89056e-05
cg27302190	-5.74803e-06	8.79326e-05	0.949793	-0.000179585	0.000168089
cg18025136	2.19953e-05	5.41613e-05	0.689786	-8.50778e-05	0.000129068
cg24638131	1.206e-05	2.16253e-05	0.578883	-3.06917e-05	5.48116e-05
cg14981312	-1.52627e-05	9.16159e-06	0.0987334	-3.33746e-05	2.84912e-06
cg09383789	-2.09042e-06	5.33278e-06	0.69805	-1.2633e-05	8.45212e-06
cg27053169	-8.6442e-07	2.58597e-05	0.973493	-5.19873e-05	5.02584e-05
cg26541516	2.10196e-05	2.11729e-05	0.319963	-2.08379e-05	6.2877e-05
cg03956833	6.05158e-06	3.00674e-05	0.842278	-5.33895e-05	6.54927e-05
cg08881995	-3.33646e-07	3.64412e-06	0.927702	-7.53782e-06	6.87053e-06
cg03705284	-9.99465e-07	4.35825e-06	0.818161	-9.61542e-06	7.61649e-06
cg15030799	-1.18223e-06	5.1329e-06	0.819876	-1.13296e-05	8.96516e-06
cg20156053	2.4179e-05	3.6379e-05	0.504326	-4.77398e-05	9.60978e-05
cg10126324	4.43796e-05	9.29507e-05	0.636326	-0.000139378	0.000228137
cg06036677	-7.63179e-05	8.53614e-05	0.371649	-0.000245072	9.24359e-05
cg10579718	-5.3824e-05	7.2621e-05	0.457817	-0.000197391	8.97427e-05
cg16679343	-4.21676e-05	0.000101742	0.677404	-0.000243305	0.000158969
cg19626656	-5.35375e-05	0.000101889	0.595016	-0.000254964	0.000147889
cg18943819	-4.55038e-05	6.11617e-05	0.457099	-0.000166416	7.54086e-05
cg10026356	-1.96481e-05	2.20311e-05	0.367087	-6.32022e-05	2.39059e-05
cg10177439	-3.37825e-05	4.76125e-05	0.476923	-0.000127909	6.03442e-05
cg00918900	0.000113643	0.000108042	0.2991	-9.99489e-05	0.000327234
cg27582017	-5.84599e-06	9.92478e-06	0.555653	-2.54666e-05	1.37746e-05
cg10113217	-1.3963e-05	7.69625e-05	0.856145	-0.000166113	0.000138187
cg08899471	-3.67155e-05	0.000105113	0.729323	-0.000244517	0.000171086
cg11920144	-7.29338e-05	0.000126092	0.562223	-0.00032221	0.000176342
cg20619296	-2.8924e-05	5.60396e-05	0.606865	-0.00013971	8.18624e-05
cg18329352	-0.000148726	5.35397e-05	0.00610888	-0.00025457	-4.28817e-05
cg25973293	-1.39345e-06	2.91137e-05	0.961945	-5.89493e-05	5.61624e-05
cg27582546	-4.76031e-06	2.93055e-05	0.870508	-6.26953e-05	5.31747e-05
cg03520879	-7.07429e-05	5.30624e-05	0.182192	-0.000175644	3.41578e-05
cg06798288	-6.68267e-05	5.59544e-05	0.235492	-0.000177445	4.37912e-05
cg23035597	-9.82763e-06	6.99762e-05	0.889503	-0.000148166	0.000128511
cg02838683	2.19804e-05	5.12407e-05	0.667508	-7.9319e-05	0.00012328
cg08131937	9.21471e-06	3.23751e-05	0.775165	-5.47886e-05	7.3218e-05
cg22512779	-0.000140106	5.06511e-05	0.00676408	-0.00024024	-3.99727e-05
cg23622235	-6.84586e-05	6.31419e-05	0.278295	-0.000193286	5.63687e-05
cg17094363	-2.42774e-05	1.97826e-05	0.221691	-6.33863e-05	1.48315e-05
cg09146328	-0.000152303	8.62231e-05	0.0757957	-0.00032276	1.8154e-05
cg21775619	-0.000128512	9.59297e-05	0.184892	-0.000318158	6.11345e-05
cg07179016	-0.000218791	0.000179579	0.226182	-0.000573806	0.000136225
cg07203151	-7.41571e-05	3.69638e-05	0.0472864	-0.000147232	-1.08221e-06
cg11750929	6.75419e-05	4.09769e-05	0.101837	-1.34666e-05	0.00014855
cg01776299	-3.3712e-05	3.79533e-05	0.373696	-0.000108743	4.1319e-05
cg00300303	-7.85504e-05	8.7316e-05	0.36528	-0.000251168	9.40673e-05
cg09032281	-6.18111e-05	5.09302e-05	0.226709	-0.000162497	3.88744e-05
cg02852398	-2.80717e-05	0.00010022	0.779494	-0.000226199	0.000170056
cg18272703	-4.0759e-05	4.12402e-05	0.325686	-0.000122288	4.077e-05
cg05528516	3.9465e-05	7.50889e-05	0.602391	-0.000108981	0.000187911
cg13361271	-4.25206e-05	5.37248e-05	0.428207	-0.000148731	6.36896e-05
cg09914843	-0.000129203	4.04713e-05	0.00186111	-0.000209212	-4.91937e-05
cg15822328	-5.82977e-05	9.43196e-05	0.538042	-0.000244761	0.000128166
cg07304255	-6.92068e-05	6.51152e-05	0.293331	-0.000197935	5.95215e-05
cg19925558	-4.24748e-05	4.706e-05	0.368762	-0.000135509	5.05597e-05
cg22433276	2.12674e-05	1.99664e-05	0.288462	-1.82049e-05	6.07397e-05
cg06615380	7.54575e-05	7.85921e-05	0.344168	-7.99136e-05	0.000230829
cg11071912	3.89316e-05	0.000120565	0.747725	-0.000199416	0.000277279
cg00812770	-7.93467e-05	5.00821e-05	0.114179	-0.000178356	1.96623e-05
cg16254267	-4.92699e-05	0.000142681	0.730911	-0.000331341	0.000232801
cg12274407	-1.45419e-06	2.4948e-05	0.953566	-5.07746e-05	4.78662e-05
cg16639967	-5.93934e-05	6.66566e-05	0.374568	-0.000191169	7.23822e-05
cg14824543	9.70416e-05	0.000108324	0.371362	-0.000117107	0.00031119
cg21862126	0.000101274	0.000155107	0.515372	-0.000205362	0.000407911
cg12097325	2.87565e-05	0.000204321	0.887993	-0.000375173	0.000432686
cg15207968	-3.46114e-05	4.60441e-05	0.45672	-0.000125638	5.64147e-05
cg12755103	-4.3035e-05	2.88723e-05	0.136891	-0.000100114	1.40436e-05
cg19708306	-3.92357e-06	5.30732e-05	0.940961	-0.000108846	0.000100999
cg03760138	2.58026e-05	6.33093e-05	0.690137	-9.93556e-05	0.000150961
cg24158844	-0.000135744	8.93394e-05	0.128174	-0.000312361	4.08743e-05
cg25772221	-5.77259e-05	0.000121967	0.636998	-0.000298847	0.000183395
cg16140890	-4.2658e-05	4.80105e-05	0.376304	-0.000137572	5.22556e-05
cg13395069	-6.2589e-05	5.89738e-05	0.29575	-0.000179176	5.39981e-05
cg03228985	-4.55648e-05	3.45506e-05	0.188565	-0.000113869	2.27395e-05
cg16989340	-5.26354e-05	6.2556e-05	0.403722	-0.000176304	7.10334e-05
cg20254790	-0.000139438	7.43762e-05	0.0624514	-0.000286475	7.59837e-06
cg11811960	-4.79476e-05	5.39648e-05	0.380651	-0.000154632	5.87371e-05
cg04311266	-1.72256e-05	2.15388e-05	0.426894	-5.98063e-05	2.5355e-05
cg05929553	2.51299e-06	1.52373e-05	0.869752	-2.76101e-05	3.26361e-05
cg10399850	-6.49119e-05	7.97719e-05	0.416988	-0.000222616	9.27917e-05
cg08803531	1.60983e-05	2.10345e-05	0.440963	-2.54856e-05	5.76821e-05
cg12806826	-4.93105e-05	6.56964e-05	0.456741	-0.000179188	8.05668e-05
cg15988843	2.54204e-05	8.55854e-06	0.00336425	8.5007e-06	4.234e-05
cg23891858	3.91772e-05	4.40183e-05	0.37257	-4.78439e-05	0.000126198
cg14288281	-0.000149733	0.000111047	0.182623	-0.000369267	6.97999e-05
cg07213830	6.90448e-05	7.82547e-05	0.389696	-8.56593e-05	0.000223749
cg09661118	-3.82934e-05	8.53855e-05	0.655686	-0.000207095	0.000130508
cg02971920	-6.66734e-06	1.93805e-05	0.731344	-4.49812e-05	3.16466e-05
cg06767191	-6.67682e-05	4.61893e-05	0.146426	-0.000158081	2.45449e-05
cg15688253	-3.52447e-05	4.45155e-05	0.425962	-0.000123249	5.27595e-05
cg22864340	-0.000130639	5.53987e-05	0.0198493	-0.000240158	-2.1119e-05
cg10335452	5.05182e-05	5.80408e-05	0.382423	-6.42245e-05	0.000165261
cg06193359	-0.000116772	9.49754e-05	0.222368	-0.000304532	7.09878e-05
cg13560058	5.76149e-05	0.000117942	0.628928	-0.000175548	0.000290778
cg00082285	-0.000241104	0.000111696	0.0325757	-0.000461921	-2.02882e-05
cg21778193	-0.00011173	0.000123818	0.366336	-0.00035651	0.00013305
cg15489799	-0.000115576	0.000102273	0.259643	-0.000317762	8.66101e-05
cg22521151	-6.35207e-05	5.24781e-05	0.228846	-0.000167266	4.02249e-05
cg00207921	-0.000120523	6.26706e-05	0.0560958	-0.000244419	3.37228e-06
cg20544808	-2.88576e-05	4.784e-05	0.548826	-0.000123434	6.57188e-05
cg18792131	-1.19999e-05	1.22369e-05	0.326536	-3.61915e-05	1.21916e-05
cg08090385	-2.33179e-05	0.000122021	0.848808	-0.000264545	0.00021791
cg08474826	-7.48516e-05	6.75618e-05	0.268469	-0.000208417	5.87134e-05
cg20185617	-0.000137428	9.16182e-05	0.137576	-0.000318551	4.36949e-05
cg04972348	-6.47267e-05	0.000131884	0.629285	-0.000325452	0.000195999
cg06618740	-0.000153895	0.000117585	0.192455	-0.000386351	7.85624e-05
cg15414773	-0.000172396	0.000105653	0.104455	-0.000381265	3.64734e-05
cg21475076	-2.20786e-05	2.7305e-05	0.430511	-7.60588e-05	3.19016e-05
cg14476334	-0.000261423	8.89322e-05	0.00415331	-0.000437236	-8.56105e-05
cg22109930	3.82687e-05	7.2787e-05	0.600974	-0.000105626	0.000182164
cg13449535	-8.38536e-05	6.28263e-05	0.182719	-0.000208057	4.03496e-05
cg07123481	-9.60648e-05	3.92848e-05	0.0160823	-0.000173728	-1.84014e-05
cg01537494	-4.13598e-05	8.31785e-05	0.618926	-0.000205798	0.000123078
cg02825344	-7.84076e-05	6.41072e-05	0.224994	-0.000205143	4.83279e-05
cg02331673	-1.33171e-06	8.81699e-05	0.987874	-0.000175638	0.000172974
cg11203990	-0.00014665	8.54514e-05	0.0865644	-0.000315582	2.22814e-05
cg13362546	-7.04158e-05	9.09084e-05	0.441666	-0.000250135	0.000109304
cg21810793	-1.57299e-05	8.52684e-05	0.855243	-0.0001843	0.00015284
cg25101291	-8.35028e-05	7.78155e-05	0.289189	-0.000237339	7.0333e-05
cg16561256	-5.46696e-05	8.7065e-05	0.531535	-0.000226791	0.000117452
cg26330479	-9.51849e-05	7.58915e-05	0.218068	-0.000245217	5.48474e-05
cg06967105	-0.000190091	8.14392e-05	0.0228202	-0.000351091	-2.90915e-05
cg23651812	-0.000315871	0.00025895	0.224526	-0.000827798	0.000196056
cg03528302	-0.000120759	8.09092e-05	0.137524	-0.000280711	3.9193e-05
cg18348086	-5.68795e-05	5.82915e-05	0.330715	-0.000172118	5.83589e-05
cg23731501	0.000256681	0.000173669	0.145835	-8.66503e-05	0.000600012
cg14287724	-5.31493e-05	0.000134676	0.690903	-0.000319394	0.000213095
cg25605174	-5.99965e-05	6.24546e-05	0.330836	-0.000183465	6.3472e-05
cg23857983	-2.06455e-05	0.000114293	0.856806	-0.000246596	0.000205305
cg27631599	0.000115987	0.000199989	0.56243	-0.000279377	0.000511351
cg14709479	-1.83877e-05	0.000179642	0.918743	-0.000373527	0.000336752
cg21288685	4.46762e-05	5.56625e-05	0.422529	-6.53647e-05	0.000154717
cg10143960	-3.36018e-05	0.000192166	0.861135	-0.000413501	0.000346298
cg01511231	-5.01338e-05	0.000233922	0.831041	-0.000512581	0.000412314
cg03278726	-0.000226809	0.000198685	0.258119	-0.000619597	0.000165978
cg15417666	-0.000370962	0.000186492	0.0492734	-0.000739645	-2.27957e-06
cg18770446	-0.00022642	0.000196333	0.257069	-0.000614557	0.000161717
cg22047469	-0.000250437	0.000225567	0.274027	-0.000696367	0.000195493
cg08933284	-0.000124536	6.14259e-05	0.042979	-0.000245971	-3.10137e-06
cg04206665	0.000107626	6.8203e-05	0.116207	-2.72062e-05	0.000242459
cg18382926	-6.32022e-06	3.2971e-05	0.847137	-7.15017e-05	5.88613e-05
cg08844387	1.94113e-05	4.10025e-05	0.639216	-6.16478e-05	0.00010047
cg16043700	-6.96377e-05	4.57048e-05	0.128838	-0.000159993	2.07175e-05
cg19584957	8.39133e-05	4.24252e-05	0.0494321	4.16755e-08	0.000167785
cg07173112	-7.12743e-05	8.46202e-05	0.407843	-0.000238563	9.60141e-05
cg07841371	-0.00011272	7.42586e-05	0.130568	-0.000259524	3.40843e-05
cg23275914	4.53154e-06	7.94667e-05	0.95466	-0.000152569	0.000161632
cg14220262	-9.33783e-05	8.53894e-05	0.274213	-0.000262187	7.54306e-05
cg05555852	2.90132e-05	8.08776e-05	0.719921	-0.000130876	0.000188903
cg02848157	-2.65386e-05	5.50209e-05	0.627685	-0.000135311	8.22339e-05
cg24884961	7.34701e-06	6.80542e-05	0.914476	-0.000127191	0.000141886
cg17168771	7.11059e-05	0.000111855	0.52401	-0.000150024	0.000292236
cg02014020	0.000114066	8.3347e-05	0.171192	-5.07053e-05	0.000278837
cg03340606	-4.70302e-05	0.000108938	0.66633	-0.000262393	0.000168333
cg17510786	-1.86502e-05	5.46968e-05	0.732702	-0.000126782	8.94817e-05
cg19724260	-0.000123033	9.02583e-05	0.170314	-0.000301467	5.54019e-05
cg05706898	-1.70672e-05	0.000145502	0.906202	-0.000304715	0.00027058
cg14008593	4.89728e-07	9.8054e-05	0.996044	-0.000193356	0.000194336
cg00699898	7.76e-06	6.81952e-05	0.909726	-0.000127057	0.000142577
cg16366262	6.50276e-05	0.000114916	0.569262	-0.000162154	0.000292209
cg08886036	-3.56541e-05	2.36526e-05	0.133437	-8.24137e-05	1.11055e-05
cg06440474	-6.88886e-05	3.82161e-05	0.0772318	-0.000144439	6.66201e-06
cg16053440	-2.19542e-05	5.28366e-05	0.67844	-0.000126409	8.25001e-05
cg14278226	-0.00015015	0.000172378	0.386058	-0.000490929	0.000190628
cg23087108	-7.8445e-05	0.000196412	0.690845	-0.000466737	0.000309847
cg06910084	-7.95326e-05	0.000169102	0.640043	-0.000413836	0.000254771
cg04808954	-0.000139048	0.000131822	0.296712	-0.000399652	0.000121556
cg10333212	-0.000155679	0.000132626	0.236901	-0.000417872	0.000106514
cg05652547	8.13815e-06	3.78639e-05	0.83045	-6.67162e-05	8.29925e-05
cg02852923	-4.5001e-05	6.76276e-05	0.505005	-0.000178696	8.86942e-05
cg00146669	-2.95806e-05	5.06108e-05	0.56076	-0.000129635	7.04735e-05
cg18411941	4.03578e-05	3.85928e-05	0.298662	-3.59375e-05	0.000116653
cg09021712	-3.32174e-05	1.8076e-05	0.0721456	-6.89523e-05	2.51759e-06
cg04154653	-8.1706e-06	4.30661e-05	0.850535	-9.33093e-05	7.69681e-05
cg14000174	-3.22114e-05	3.33804e-05	0.332127	-9.82022e-05	3.37794e-05
cg13089299	-2.91552e-05	3.3475e-05	0.385359	-9.53331e-05	3.70226e-05
cg22723960	-7.74641e-05	3.44424e-05	0.0258072	-0.000145554	-9.37385e-06
cg13360866	-0.000109261	7.82228e-05	0.166409	-0.000263902	4.53802e-05
cg24807889	-0.0002032	7.53816e-05	0.00788927	-0.000352224	-5.41755e-05
cg05952202	-0.000124072	0.000111596	0.270825	-0.000344689	9.65455e-05
cg04172501	-0.000132698	0.000103144	0.204063	-0.000336607	7.12112e-05
cg23400617	2.09857e-05	4.19431e-05	0.618274	-6.19329e-05	0.000103904
cg06778273	-2.37829e-06	1.4126e-05	0.865511	-3.03043e-05	2.55478e-05
cg18319381	-7.97117e-05	9.03979e-05	0.3811	-0.000258422	9.89988e-05
cg19413397	-8.87857e-05	8.00612e-05	0.269794	-0.000247061	6.94898e-05
cg12810734	2.57876e-05	7.80985e-05	0.74158	-0.000128608	0.000180183
cg16046810	1.91679e-05	4.30101e-05	0.659589	-6.58601e-05	0.000104196
cg22345205	-1.10795e-05	2.41864e-05	0.647689	-5.88944e-05	3.67353e-05
cg21038584	-7.17811e-05	5.91825e-05	0.222489	-0.000188781	4.52187e-05
cg19237691	-3.8791e-05	0.000106062	0.713501	-0.000248469	0.000170887
cg08641866	-5.95514e-05	6.78977e-05	0.379985	-0.00019378	7.46778e-05
cg14886269	-5.09129e-05	0.000110007	0.641989	-0.000268389	0.000166563
cg15706223	-5.81544e-05	9.65141e-05	0.547489	-0.000248956	0.000132647
cg06097659	5.40067e-05	5.4088e-05	0.318874	-5.29216e-05	0.000160935
cg04343794	-2.28529e-05	0.000168054	0.891973	-0.000355084	0.000309378
cg07671976	2.19861e-05	8.87055e-05	0.80423	-0.000153378	0.000197351
cg25725823	1.98355e-06	0.00010557	0.985079	-0.000206722	0.000210689
cg00086243	4.94593e-05	7.77281e-05	0.524727	-0.000104204	0.000203122
cg10583942	-8.13609e-05	9.65426e-05	0.397989	-0.000272219	0.000109497
cg07119157	-6.57249e-05	0.000108707	0.545901	-0.000280631	0.000149181
cg19092396	-0.000257846	0.000164979	0.120856	-0.000583998	6.83065e-05
cg12701018	-0.000127035	0.000173448	0.467281	-0.000469931	0.000215861
cg25144135	-0.000140496	0.000179015	0.434036	-0.000494397	0.000213404
cg20996124	-1.91308e-06	6.3603e-05	0.975941	-0.000127652	0.000123826
cg16266669	1.62278e-05	9.72595e-05	0.868783	-0.000176048	0.000208503
cg02296931	0.00028106	0.000232846	0.227668	-0.00017926	0.000741379
cg15924570	-0.000104713	9.96187e-05	0.291072	-0.000301652	9.22266e-05
cg25625296	-6.54943e-05	6.60449e-05	0.323636	-0.00019606	6.50718e-05
cg09503311	-1.03342e-05	2.54626e-05	0.687243	-6.0672e-05	4.00036e-05
cg20544186	-8.22597e-05	4.66598e-05	0.0793449	-0.000174503	9.98345e-06
cg01437515	-2.2808e-05	9.07288e-05	0.802941	-0.000202173	0.000156557
cg12759096	-3.30313e-05	9.60762e-05	0.73005	-0.000222967	0.000156905
cg22335801	-1.49901e-05	6.49133e-05	0.816	-0.000143319	0.000113339
cg14661234	-0.000202484	9.01815e-05	0.0245434	-0.000380767	-2.42016e-05
cg23166857	-0.000296107	0.000116341	0.0115459	-0.000526106	-6.61083e-05
cg09586191	-7.94012e-05	4.43121e-05	0.0751963	-0.000167003	8.20065e-06
cg01341040	-2.98255e-05	5.8285e-05	0.60755	-0.000145051	8.53999e-05
cg21815220	-2.58286e-06	8.77182e-05	0.976491	-0.000175996	0.00017083
cg17084044	1.64303e-05	0.000115768	0.886665	-0.000212435	0.000245296
cg16252905	1.09853e-05	7.92696e-05	0.889647	-0.000145725	0.000167696
cg26312965	0.000129437	6.79667e-05	0.0598466	-4.92899e-06	0.000263802
cg09315878	-1.01137e-05	2.51468e-05	0.686341	-5.98271e-05	3.95997e-05
cg01075305	-8.86548e-05	7.41284e-05	0.230718	-0.000235202	5.78921e-05
cg03058163	0.000103313	0.000162546	0.528127	-0.00021803	0.000424655
cg03580801	0.000140085	0.000169065	0.405949	-0.000194144	0.000474314
cg19862782	0.00011715	0.000101602	0.252001	-8.37109e-05	0.000318011
cg12219387	-4.51124e-06	6.48632e-06	0.491864	-1.73343e-05	8.31178e-06
cg11727921	-6.42439e-05	5.08874e-05	0.209059	-0.000164845	3.63569e-05
cg01783406	-1.64626e-07	2.67454e-05	0.995107	-5.30385e-05	5.27093e-05
cg14531564	-8.40973e-06	2.21882e-05	0.706583	-5.22743e-05	3.54548e-05
cg09276842	-2.48016e-05	1.15771e-05	0.0336401	-4.76887e-05	-1.91444e-06
cg07548512	-2.88099e-06	5.92919e-06	0.626658	-1.46026e-05	8.84061e-06
cg22798412	2.53206e-06	1.23603e-05	0.837969	-2.19034e-05	2.69675e-05
cg27477059	-1.41883e-06	5.07997e-05	0.977973	-0.000101846	9.90086e-05
cg25578497	-9.38776e-07	5.72078e-05	0.986898	-0.000114035	0.000112157
cg00656410	-9.16429e-06	2.63884e-05	0.73021	-6.13323e-05	4.30037e-05
cg10206039	-1.94275e-05	3.22786e-05	0.549357	-8.324e-05	4.4385e-05
cg05818515	-7.88276e-05	5.16021e-05	0.131811	-0.000180841	2.31862e-05
cg03467014	-2.56376e-05	7.54845e-05	0.733245	-0.000174865	0.00012359
cg23082845	-1.51041e-05	1.40196e-05	0.287284	-4.28199e-05	1.26118e-05
cg04559485	1.09984e-05	1.97246e-05	0.57943	-2.79958e-05	4.99925e-05
cg21837391	-4.89233e-05	5.60625e-05	0.383417	-0.000159755	6.19085e-05
cg05329510	-6.86694e-05	5.62197e-05	0.220617	-0.000179812	4.24732e-05
cg17414873	-5.79491e-05	5.48782e-05	0.289011	-0.000166439	5.05413e-05
cg03935783	-7.86406e-06	1.00406e-05	0.436455	-2.77135e-05	1.19854e-05
cg20300707	1.35675e-05	7.63481e-05	0.862523	-0.000137367	0.000164502
cg23963070	-1.30883e-05	4.74835e-05	0.786145	-0.00010696	8.07832e-05
cg09812885	-4.13353e-05	3.78517e-05	0.277982	-0.000116165	3.34949e-05
cg13470499	-1.9818e-05	5.40203e-05	0.714797	-0.000126612	8.69764e-05
cg27310827	1.42835e-06	5.92498e-06	0.809727	-1.02849e-05	1.31416e-05
cg11257497	1.76453e-05	3.86789e-05	0.65023	-5.88202e-05	9.41109e-05
cg14965611	-2.39937e-06	2.08627e-05	0.908506	-4.36435e-05	3.88448e-05
cg20014591	-2.36746e-05	3.71805e-05	0.525959	-9.71778e-05	4.98286e-05
cg02224920	1.12181e-05	3.47452e-05	0.742385	-5.74707e-05	7.99069e-05
cg20871445	-2.36227e-05	2.60437e-05	0.376048	-7.51092e-05	2.78639e-05
cg14394203	9.59634e-06	5.25339e-06	0.0730048	-7.89239e-07	1.99819e-05
cg13924635	-2.79436e-05	2.48532e-05	0.257322	-7.70768e-05	2.11895e-05
cg08701814	8.03618e-05	0.000107345	0.454334	-0.000131851	0.000292575
cg22220310	1.71802e-05	9.44321e-06	0.0702499	-1.48842e-06	3.58487e-05
cg14477263	-2.90128e-06	8.40616e-06	0.729609	-1.95197e-05	1.37171e-05
cg08706355	-4.94236e-07	2.97364e-05	0.986697	-5.92811e-05	5.82926e-05
cg07963816	-2.68267e-05	4.79858e-05	0.577301	-0.000121691	6.80378e-05
cg07146103	1.07142e-05	4.40983e-05	0.813013	-7.6465e-05	9.78935e-05
cg25731959	-0.00011209	6.6965e-05	0.0952559	-0.000244476	2.02948e-05
cg14830045	-3.38105e-05	0.000162536	0.835081	-0.000355133	0.000287512
cg10784110	7.93532e-05	8.04034e-05	0.324672	-7.95988e-05	0.000238305
cg06964912	1.21143e-05	9.45307e-05	0.899467	-0.000174766	0.000198995
cg12108798	-1.89638e-05	8.56281e-05	0.826519	-0.000188245	0.000150317
cg00657094	5.12195e-05	0.000107291	0.633666	-0.000160887	0.000263326
cg20411340	8.59022e-05	9.38136e-05	0.360134	-9.95609e-05	0.000271365
cg24034746	2.85727e-05	9.13895e-05	0.755278	-0.000152098	0.000209243
cg09331144	-2.96885e-05	0.000158675	0.850765	-0.000343378	0.000284001
cg10483828	-4.27565e-05	3.0585e-05	0.164819	-0.000103221	1.7708e-05
cg07719599	-7.72311e-05	0.000116431	0.511053	-0.000307407	0.000152945
cg00211609	8.95183e-06	0.000115541	0.938451	-0.000219465	0.000237369
cg10378904	9.31258e-05	0.000194415	0.634521	-0.000291219	0.000477471
cg22512888	-1.83509e-05	4.42674e-05	0.679311	-0.000105865	6.91626e-05
cg21664227	-7.09113e-06	4.18464e-05	0.866581	-8.98185e-05	7.56363e-05
cg26362806	-3.24044e-05	5.18151e-05	0.528358	-0.000134839	7.00305e-05
cg19666520	-3.01769e-06	6.42529e-06	0.640275	-1.572e-05	9.68466e-06
cg14329010	-7.93512e-05	4.54467e-05	0.0819009	-0.000169196	1.04938e-05
cg12345380	-6.01106e-05	6.14476e-05	0.334225	-0.000181588	6.13672e-05
cg02279987	-2.18283e-05	9.10795e-05	0.812636	-0.000201886	0.00015823
cg19236794	-5.11619e-05	0.000125923	0.685255	-0.000300103	0.000197779
cg04719903	9.50056e-06	5.15693e-05	0.853094	-9.24484e-05	0.00011145
cg25594899	8.62232e-07	9.44001e-06	0.927729	-1.78e-05	1.95245e-05
cg06136878	-5.0483e-06	1.23788e-05	0.685551	-2.95204e-05	1.94238e-05
cg14089984	-1.09637e-05	2.87961e-05	0.704055	-6.78916e-05	4.59642e-05
cg06443533	-9.59194e-05	5.43149e-05	0.0816384	-0.000203296	1.14575e-05
cg26314055	-6.86526e-05	6.48257e-05	0.295478	-0.000196809	5.95033e-05
cg02751993	-7.72863e-05	6.65968e-05	0.255077	-0.000208944	5.4371e-05
cg20747739	-2.34517e-05	9.72099e-05	0.810692	-0.000215629	0.000168726
cg15582176	-3.32089e-05	9.21676e-05	0.722659	-0.000215418	0.000149
cg13440692	-5.9249e-05	4.97834e-05	0.237358	-0.000157667	3.91694e-05
cg10664344	-4.20723e-05	8.27899e-05	0.609146	-0.000205742	0.000121598
cg19869091	-6.62341e-06	1.4884e-05	0.655116	-3.60481e-05	2.28013e-05
cg08643618	-5.84413e-06	8.48793e-06	0.493455	-2.26242e-05	1.09359e-05
cg24701867	-2.8302e-06	9.61658e-06	0.769203	-2.18415e-05	1.61811e-05
cg06361835	-2.5777e-05	5.78525e-05	0.654776	-0.000140147	8.85935e-05
cg16176300	-0.000129168	8.73176e-05	0.140829	-0.000301788	4.34533e-05
cg17469240	-9.11656e-06	9.14761e-06	0.317874	-2.72008e-05	8.96764e-06
cg19081571	9.80234e-07	1.92922e-05	0.959501	-3.71591e-05	3.91196e-05
cg13689260	-1.77668e-05	3.3461e-05	0.595326	-8.39169e-05	4.83834e-05
cg10518155	-6.08717e-05	2.7836e-05	0.0299736	-0.000115902	-5.84185e-06
cg17784606	-4.3315e-06	1.47241e-05	0.768531	-3.34401e-05	2.47771e-05
cg18153662	-1.43708e-05	4.62204e-05	0.75726	-0.000105745	7.70037e-05
cg08733913	-9.16753e-06	1.31145e-05	0.484609	-3.50941e-05	1.6759e-05
cg02334770	0.000150925	9.35789e-05	0.10849	-3.4074e-05	0.000335924
cg03583709	-3.71915e-05	5.88315e-05	0.526462	-0.000153497	7.91144e-05
cg13152599	3.09495e-05	9.49219e-05	0.745162	-0.000156705	0.000218604
cg23880637	-1.88691e-05	4.45657e-05	0.672998	-0.000106972	6.92343e-05
cg22699977	-6.35884e-05	7.90121e-05	0.423507	-0.00021979	9.2613e-05
cg10245314	-4.73777e-05	4.57727e-05	0.30083	-0.000137867	4.31117e-05
cg21583518	-3.55023e-05	8.17406e-05	0.671229	-0.000197098	0.000126093
cg14661139	-1.92292e-05	8.37031e-05	0.817248	-0.000184704	0.000146246
cg17177602	0.000105244	7.84391e-05	0.180524	-4.98247e-05	0.000260313
cg08884932	-5.16023e-05	4.37122e-05	0.241197	-0.000138018	3.48138e-05
cg11225330	-5.84299e-06	5.6025e-05	0.916545	-0.000116601	0.000104915
cg17869799	8.96119e-05	0.000194219	0.646734	-0.000294346	0.00047357
cg03525583	-4.96994e-06	2.82455e-05	0.858899	-6.08093e-05	5.08694e-05
cg04026747	-7.27501e-06	2.32189e-05	0.755205	-5.31772e-05	3.86272e-05
cg19709095	-1.47389e-05	3.28224e-05	0.654867	-7.96265e-05	5.01487e-05
cg17848797	2.30414e-05	2.9802e-05	0.440732	-3.58751e-05	8.19579e-05
cg12631550	3.69598e-05	5.57428e-05	0.505733	-7.32399e-05	0.00014716
cg21680388	3.12432e-05	2.81087e-05	0.269318	-2.43257e-05	8.68121e-05
cg22725197	2.26949e-05	5.22531e-05	0.666646	-8.06058e-05	0.000125996
cg02823370	-9.86349e-05	8.06415e-05	0.22213	-0.000258058	6.07877e-05
cg08486042	2.83404e-05	8.6042e-05	0.744061	-0.000141759	0.00019844
cg07269843	-5.52907e-05	8.178e-05	0.500105	-0.000216964	0.000106383
cg01341249	-4.19469e-05	2.67144e-05	0.121328	-9.47595e-05	1.08657e-05
cg15578176	2.78718e-05	6.41104e-05	0.661889	-9.88701e-05	0.000154614
cg09906735	8.44398e-06	1.76347e-05	0.630779	-2.64186e-05	4.33066e-05
cg25674129	-7.65456e-05	4.37732e-05	0.0811976	-0.000163082	9.99097e-06
cg13375638	-7.33167e-05	4.47351e-05	0.105519	-0.000161755	1.51216e-05
cg04296903	3.35202e-06	6.22912e-06	0.595547	-8.96253e-06	1.56666e-05
cg26527092	-6.52544e-05	5.91896e-05	0.274176	-0.000182268	5.17595e-05
cg19816994	2.14856e-06	1.18664e-05	0.85504	-2.13105e-05	2.56076e-05
cg24658349	-9.328e-06	4.05159e-05	0.816395	-8.94252e-05	7.07692e-05
cg02859098	-8.42739e-05	3.60885e-05	0.0203904	-0.000155618	-1.29294e-05
cg22009470	0.000159115	0.000231985	0.49417	-0.000299504	0.000617733
cg17599045	6.95034e-05	4.68062e-05	0.135699	-2.30293e-05	0.000162036
cg16045223	1.89325e-05	0.000133834	0.888003	-0.000245648	0.000283513
cg23891364	0.000177801	0.000120741	0.142954	-6.08955e-05	0.000416498
cg21864845	-1.87931e-06	4.56873e-05	0.967459	-9.22e-05	8.84414e-05
cg02913364	1.6453e-05	4.80219e-05	0.729835	-7.84829e-05	0.000111389
cg16717690	4.32314e-06	6.98037e-06	0.538141	-9.47658e-06	1.81229e-05
cg09094385	1.60021e-05	8.37966e-06	0.0615001	-5.63872e-07	3.25681e-05
cg02581421	-3.90552e-06	1.34417e-05	0.772895	-3.04788e-05	2.26678e-05
cg03322129	1.34522e-05	3.07244e-05	0.66136	-4.72879e-05	7.41922e-05
cg01794932	-4.57962e-05	3.2552e-05	0.159694	-0.000110149	1.85569e-05
cg26163375	-1.67241e-05	9.0324e-06	0.0674577	-3.45806e-05	1.13229e-06
cg22670128	-6.4744e-05	9.23846e-05	0.488594	-0.000247382	0.000117894
cg10410269	-3.74794e-05	9.53765e-05	0.695297	-0.000226032	0.000151073
cg19933051	-6.94909e-06	6.48751e-05	0.914121	-0.000135203	0.000121305
cg16626107	3.67464e-07	4.11601e-05	0.992922	-8.10032e-05	8.17381e-05
cg06294324	-1.77654e-06	2.62267e-05	0.946429	-5.36249e-05	5.00718e-05
cg27530087	-3.54025e-05	3.71102e-05	0.337448	-0.000108767	3.79618e-05
cg14436909	-1.876e-05	3.27601e-05	0.567664	-8.35244e-05	4.60044e-05
cg06198843	1.27508e-06	1.86807e-05	0.945654	-3.56553e-05	3.82055e-05
cg16343995	-2.92138e-05	2.32607e-05	0.212064	-7.51986e-05	1.6771e-05
cg00942814	-3.96767e-05	2.85721e-05	0.165493	-9.61619e-05	1.68084e-05
cg07812848	-1.84396e-05	2.48203e-05	0.457383	-6.75075e-05	3.06284e-05
cg24457425	-4.61258e-05	3.97918e-05	0.247919	-0.000124792	3.25399e-05
cg10784146	-2.92764e-05	2.45064e-05	0.232128	-7.77239e-05	1.9171e-05
cg06002705	-3.44305e-05	2.62957e-05	0.191322	-8.64154e-05	1.75544e-05
cg12120973	8.87246e-05	5.38459e-05	0.0996026	-1.77252e-05	0.000195174
cg19861048	-3.39453e-05	4.76714e-05	0.476597	-0.000128188	6.02978e-05
cg13587552	-7.0434e-06	6.446e-05	0.913908	-0.000134476	0.00012039
cg11229611	-2.90142e-05	6.458e-05	0.655635	-0.000156684	9.8656e-05
cg06909630	-2.38783e-05	7.80801e-05	0.760277	-0.000178237	0.000130481
cg17645946	-9.47631e-05	0.00015925	0.550107	-0.00040959	0.000220064
cg27651942	-5.44274e-05	0.000108507	0.614589	-0.000268937	0.000160083
cg15419710	-3.73829e-05	0.000115935	0.748902	-0.000266579	0.000191813
cg00825734	-7.16135e-05	0.000105443	0.495528	-0.000280066	0.000136839
cg22421766	-0.000106265	5.93473e-05	0.0782975	-0.000223591	1.10605e-05
cg24576260	2.72081e-05	7.45978e-05	0.719044	-0.000120267	0.000174683
cg21203719	-9.58205e-05	6.69295e-05	0.153989	-0.000228136	3.64945e-05
cg24852892	-3.93219e-06	4.8951e-05	0.937538	-0.000100705	9.28405e-05
cg22225577	8.25903e-06	9.62599e-05	0.931685	-0.00018204	0.000198558
cg10119342	-1.42866e-05	0.000116788	0.903024	-0.000245168	0.000216595
cg06679168	-0.000103599	8.35932e-05	0.218452	-0.000268857	6.16587e-05
cg16995668	-3.8204e-06	6.66664e-05	0.954792	-0.000135615	0.000127974
cg09870910	6.6509e-05	5.1874e-05	0.199731	-3.60424e-05	0.00016906
cg25151559	7.50948e-05	0.000103954	0.468963	-0.000130415	0.000280605
cg20674014	-0.000191416	0.000130697	0.141616	-0.000449795	6.69622e-05
cg18224942	9.35659e-06	0.000138386	0.946724	-0.000264223	0.000282936
cg15683497	4.79601e-05	9.85727e-05	0.627721	-0.000146911	0.000242831
cg20978193	-8.8113e-05	0.000112125	0.430165	-0.000309775	0.000133549
cg13681826	1.72156e-05	7.50955e-05	0.818898	-0.000131243	0.000165674
cg16380285	3.39089e-05	4.16391e-05	0.419859	-4.84088e-05	0.000116227
cg15994839	-0.000110994	0.000149541	0.460182	-0.000406627	0.000184639
cg21265287	3.42779e-06	0.000179175	0.98486	-0.000350789	0.000357644
cg02506501	3.79043e-05	5.0627e-05	0.454189	-6.21819e-05	0.00013799
cg14728174	-0.000178439	0.000120511	0.140838	-0.00041668	5.98025e-05
cg06818047	-7.76264e-05	0.000153795	0.615622	-0.000381668	0.000226415
cg22161575	-1.57371e-05	7.60894e-05	0.838062	-0.000166161	0.000134686
cg03003335	1.78805e-05	0.000264837	0.946198	-0.000505684	0.000541445
cg01937247	-0.000127598	8.70329e-05	0.148147	-0.000299657	4.44597e-05
cg01515136	-0.000108495	0.000114837	0.345468	-0.00033552	0.000118531
cg17026072	-7.3157e-07	7.12347e-06	0.918126	-1.48142e-05	1.3351e-05
cg13452079	-8.2e-05	7.71217e-05	0.291072	-0.000234464	7.04643e-05
cg25106100	3.52786e-05	4.41968e-05	0.428594	-5.20954e-05	0.000122653
cg03001234	-0.000108323	7.84575e-05	0.167059	-0.000263429	4.67816e-05
cg27543922	2.17284e-05	8.13429e-05	0.79411	-0.000139081	0.000182538
cg18163062	5.43489e-05	0.000112122	0.630231	-0.000167309	0.000276007
cg14529643	2.00111e-05	9.1924e-05	0.827678	-0.000161716	0.000201739
cg25021451	-1.31126e-08	6.37176e-05	0.999835	-0.000125978	0.000125952
cg04584842	8.69008e-05	0.000122854	0.479808	-0.000155973	0.000329775
cg18538985	-4.01382e-05	0.000108735	0.714931	-0.0002551	0.000174824
cg19414302	-0.000105052	0.000191649	0.582853	-0.000483928	0.000273824
cg22675767	4.15054e-05	0.000130604	0.751704	-0.00021669	0.000299701
cg06759632	-0.000162638	0.000103559	0.11674	-0.000367368	4.20914e-05
cg17405058	-6.22288e-05	5.64669e-05	0.276518	-0.00017386	4.94024e-05
cg17712416	-0.000117257	0.000100486	0.242584	-0.000315911	8.13967e-05
cg25203980	-0.000192397	0.000126818	0.129722	-0.000443108	5.83132e-05
cg02953397	-8.8757e-05	0.000183864	0.628705	-0.000452243	0.000274729
cg18565510	-4.08974e-05	0.00012231	0.739218	-0.000282696	0.000200901
cg27185793	1.4164e-05	9.52787e-05	0.883263	-0.000174196	0.000202524
cg09556527	-0.000134264	0.00015932	0.396928	-0.000449229	0.000180702
cg07181952	-7.50651e-05	0.000132812	0.57005	-0.000337626	0.000187496
cg22346297	-5.71316e-05	5.87562e-05	0.333937	-0.000173289	5.90255e-05
cg23310884	-0.000170395	8.25142e-05	0.0412926	-0.00033352	-7.26995e-06
cg26333156	-1.06334e-06	2.14052e-05	0.960847	-4.338e-05	4.12534e-05
cg00262415	-1.60441e-05	1.18276e-05	0.174946	-3.94264e-05	7.33823e-06
cg27440283	2.20464e-05	2.82826e-05	0.443066	-3.38663e-05	7.79592e-05
cg00086266	-1.36653e-05	2.89275e-05	0.636723	-7.0853e-05	4.35224e-05
cg19323338	1.21103e-05	2.45813e-05	0.628545	-3.64853e-05	6.07059e-05
cg24157952	-2.64528e-06	1.89649e-05	0.889422	-4.01376e-05	3.4847e-05
cg15042692	-2.28877e-06	4.14693e-06	0.586205	-1.0487e-05	5.90942e-06
cg04840417	-4.17749e-06	5.12079e-06	0.415994	-1.43009e-05	5.94595e-06
cg16887862	4.55767e-05	3.9626e-05	0.24935	-3.27613e-05	0.000123915
cg25201327	5.36366e-06	3.65124e-06	0.148991	-1.8546e-06	1.25819e-05
cg15868629	2.76425e-06	7.34343e-06	0.709071	-1.17532e-05	1.72817e-05
cg27642349	4.20423e-07	6.26011e-06	0.946829	-1.19554e-05	1.27962e-05
cg26214604	-1.67947e-05	1.70183e-05	0.324046	-5.04386e-05	1.68493e-05
cg18224588	-4.76515e-06	9.4111e-06	0.616302	-2.33702e-05	1.38399e-05
cg25536368	1.0685e-05	9.06435e-06	0.250277	-7.23457e-06	2.86046e-05
cg00903892	1.24594e-06	3.06806e-05	0.967649	-5.94074e-05	6.18993e-05
cg14488957	1.83175e-05	3.93769e-05	0.643391	-5.95279e-05	9.6163e-05
cg06085743	-5.35922e-05	0.000126211	0.67532	-0.000303103	0.000195918
cg05397202	3.26557e-05	6.9896e-05	0.641295	-0.000105524	0.000170835
cg23931819	-8.08716e-05	0.000114311	0.478058	-0.000306857	0.000145114
cg02506753	8.72599e-06	9.32313e-05	0.924995	-0.000175586	0.000193038
cg05362521	-5.08624e-05	5.68861e-05	0.369594	-0.000163322	6.15975e-05
cg05724097	2.76221e-05	6.86325e-05	0.690244	-0.00010806	0.000163304
cg26369180	-0.000108638	7.75219e-05	0.162813	-0.000261893	4.46178e-05
cg19383909	-6.61712e-05	6.41088e-05	0.304643	-0.00019291	6.05675e-05
cg26576041	-4.80723e-05	5.52474e-05	0.383948	-0.000157293	6.11479e-05
cg11847126	3.70941e-05	4.86387e-05	0.445304	-5.90613e-05	0.000133249
cg15736449	-3.84952e-05	5.32885e-05	0.473092	-0.000143843	6.68526e-05
cg23689441	-6.70561e-05	6.04839e-05	0.268969	-0.000186629	5.25164e-05
cg17709975	-0.000109006	7.68156e-05	0.162758	-0.000260865	4.2853e-05
cg10435967	-1.09969e-05	0.000111377	0.921997	-0.000231181	0.000209188
cg16712243	8.79246e-05	8.00609e-05	0.271429	-7.03504e-05	0.0002462
cg08663263	4.75985e-05	2.19576e-05	0.0315222	4.18976e-06	9.10073e-05
cg07568471	-5.87628e-05	0.000101751	0.564744	-0.000259918	0.000142393
cg26931466	2.30838e-06	8.85335e-05	0.979352	-0.000172716	0.000177333
cg26866277	-8.6474e-05	7.42828e-05	0.246681	-0.000233326	6.0378e-05
cg09299774	-0.000121834	8.24407e-05	0.140442	-0.000284814	4.11457e-05
cg08939275	-0.000201579	0.000188605	0.28483	-0.000574439	0.00017128
cg22665280	3.41661e-07	3.46171e-05	0.992267	-6.80939e-05	6.87773e-05
cg19585749	-8.03402e-06	7.1463e-05	0.910494	-0.000149312	0.000133243
cg04926200	-7.46274e-05	6.63821e-05	0.261134	-0.00020586	5.66054e-05
cg12609142	-2.57591e-05	4.72575e-05	0.585465	-0.000119184	6.76657e-05
cg22130030	-8.3733e-05	6.97471e-05	0.230751	-0.000221618	5.41523e-05
cg09862283	0.000131542	0.00011644	0.26403	-9.86504e-05	0.000361735
cg15901950	-1.58122e-05	6.64976e-05	0.812014	-0.000147273	0.000115649
cg12046908	-4.68813e-06	1.59651e-05	0.771813	-3.62501e-05	2.68739e-05
cg26831087	7.73577e-05	7.41725e-05	0.299169	-6.92762e-05	0.000223992
cg21197375	-6.19331e-06	9.49624e-06	0.514639	-2.49667e-05	1.25801e-05
cg20236831	3.1329e-06	7.62091e-06	0.682114	-1.19331e-05	1.81989e-05
cg13183628	2.8128e-06	5.33837e-06	0.60219	-7.74079e-06	1.33664e-05
cg06038049	-5.92513e-06	3.30885e-06	0.0773288	-1.24665e-05	6.16239e-07
cg17612270	5.35452e-05	2.7718e-05	0.0578461	-1.2513e-06	0.000108342
cg22397910	5.11459e-06	5.79935e-06	0.386793	-6.35033e-06	1.65795e-05
cg22125623	1.22622e-05	4.60653e-06	0.00919613	3.15542e-06	2.1369e-05
cg19834486	-1.50469e-05	1.89034e-05	0.425217	-5.24177e-05	2.2324e-05
cg13649172	-3.05286e-05	3.32411e-05	0.357038	-9.62439e-05	3.51867e-05
cg04232698	2.53041e-05	5.01772e-05	0.613891	-7.38929e-05	0.000124501
cg16855244	-1.85817e-05	6.1642e-05	0.761167	-0.000140444	0.00010328
cg19827148	5.32557e-06	1.36166e-05	0.69719	-2.15936e-05	3.22447e-05
cg05378358	-5.54976e-05	5.91739e-05	0.347129	-0.00017248	6.14852e-05
cg06520508	-6.84192e-05	6.70719e-05	0.310746	-0.000201016	6.41774e-05
cg17970390	-0.000168994	8.13649e-05	0.0382307	-0.000329847	-8.1409e-06
cg05795376	-2.22942e-05	5.83491e-05	0.702076	-0.000137646	9.3058e-05
cg05598010	3.0192e-05	0.000117531	0.798991	-0.000202158	0.000262542
cg16255279	-1.83431e-05	4.43442e-05	0.681006	-0.000106008	6.93223e-05
cg22622472	-2.88146e-05	3.74472e-05	0.443578	-0.000102845	4.5216e-05
cg16432326	8.24969e-05	6.80507e-05	0.234925	-5.20348e-05	0.000217028
cg07394827	-9.81147e-05	6.75497e-05	0.148722	-0.000231656	3.54264e-05
cg02625725	-1.3646e-05	6.45425e-05	0.832191	-0.000141242	0.00011395
cg06599206	-8.59199e-06	3.74644e-05	0.818339	-8.26565e-05	6.54725e-05
cg03833995	6.65098e-05	3.24569e-05	0.038761	2.34479e-06	0.000130675
cg20705390	0.000140243	0.000113674	0.22014	-8.44827e-05	0.000364968
cg04981007	0.000142169	0.000129312	0.276056	-0.000113472	0.00039781
cg16430279	0.000271856	0.000131102	0.0399429	1.2676e-05	0.000531036
cg15365642	3.65544e-05	9.9253e-05	0.714601	-0.000159662	0.000232771
cg24252805	1.21342e-05	7.08827e-05	0.863737	-0.000127996	0.000152264
cg14890378	6.30902e-05	8.19313e-05	0.440069	-9.88822e-05	0.000225063
cg07346648	7.88367e-05	6.59565e-05	0.241586	-5.15548e-05	0.000209228
cg08037114	1.42388e-05	6.06035e-05	0.816696	-0.00010557	0.000134048
cg04910752	1.47937e-05	7.76164e-05	0.848232	-0.000138649	0.000168236
cg13246026	-8.24182e-05	7.40715e-05	0.26392	-0.000228853	6.40162e-05
cg21396988	-0.000146517	6.65368e-05	0.0288542	-0.000278056	-1.49785e-05
cg06802641	4.48404e-05	0.000158506	0.77934	-0.000268516	0.000358197
cg03402404	-7.91859e-05	9.59841e-05	0.41	-0.00026894	0.000110568
cg10065209	2.59226e-05	8.73233e-05	0.769491	-0.000146709	0.000198555
cg08621441	-9.42504e-05	6.61619e-05	0.155562	-0.000225048	3.65471e-05
cg18386618	-0.00026095	7.72314e-05	0.000964439	-0.000413631	-0.000108269
cg06395167	-8.61342e-05	6.60457e-05	0.191475	-0.000216702	4.44337e-05
cg16174225	-9.47736e-06	8.65438e-05	0.913729	-0.000180568	0.000161614
cg00002593	-6.68981e-05	7.02545e-05	0.341707	-0.000205786	7.19902e-05
cg11808871	-5.91779e-05	6.68052e-05	0.374764	-0.000191247	7.28914e-05
cg14911892	-2.23926e-05	7.15391e-05	0.756026	-0.000163821	0.000119035
cg08160862	-2.0801e-05	1.83802e-05	0.26261	-5.71373e-05	1.55353e-05
cg26351554	-2.75173e-05	4.47109e-05	0.537918	-0.000115908	6.08731e-05
cg24399111	-6.79763e-05	7.44134e-05	0.369284	-0.000215087	7.9134e-05
cg18024631	7.1332e-07	8.48915e-05	0.993301	-0.000167111	0.000168538
cg07313814	-3.15726e-05	7.19399e-05	0.660055	-0.000173793	0.000110648
cg11339519	6.76801e-05	2.54546e-05	0.00868931	1.73581e-05	0.000118002
cg00542041	-4.9525e-06	6.90896e-06	0.47355	-1.8611e-05	8.70604e-06
cg16575694	-5.16867e-06	4.98545e-06	0.300056	-1.50246e-05	4.68722e-06
cg06646682	-9.31289e-05	7.85801e-05	0.241258	-0.000248476	6.22185e-05
cg12072393	-8.37116e-05	5.9934e-05	0.166768	-0.000202197	3.47739e-05
cg13494355	1.80507e-05	2.38365e-05	0.44964	-2.90724e-05	6.51737e-05
cg22376366	1.77471e-06	1.12331e-05	0.875268	-2.04324e-05	2.39818e-05
cg25203539	-3.16769e-05	5.8401e-05	0.586099	-0.000147132	8.3778e-05
cg19898526	-7.74162e-05	7.03242e-05	0.28173	-0.000216442	6.16099e-05
cg06649390	-6.07702e-05	6.3545e-05	0.342166	-0.000186394	6.4854e-05
cg17748182	-7.63753e-05	4.91895e-05	0.121802	-0.00017362	2.0869e-05
cg03465880	-2.82815e-06	5.15544e-06	0.592163	-1.30201e-05	7.3638e-06
cg15462203	-3.75469e-05	4.43896e-05	0.396122	-0.000125302	5.02082e-05
cg10556264	-8.04251e-06	4.09457e-05	0.845721	-8.89894e-05	7.29044e-05
cg22709966	-2.15619e-05	5.56701e-05	0.69822	-0.000131618	8.84941e-05
cg15976416	-3.64593e-05	6.12232e-05	0.550105	-0.000157493	8.45747e-05
cg17838754	-5.34166e-06	8.01979e-05	0.947487	-0.000163887	0.000153204
cg09569143	1.32932e-05	0.000116207	0.908958	-0.00021644	0.000243026
cg13932473	5.73671e-07	0.000117982	0.996135	-0.000232668	0.000233815
cg04119843	-3.27058e-05	3.07957e-05	0.287714	-9.35868e-05	2.81751e-05
cg09236098	2.80313e-06	5.73469e-06	0.627274	-8.53396e-06	1.41402e-05
cg05115545	-2.10605e-06	4.45583e-06	0.637526	-1.09149e-05	6.70281e-06
cg10164137	-9.98852e-06	1.31532e-05	0.448212	-3.59914e-05	1.60144e-05
cg17873420	1.65421e-06	5.40635e-06	0.75849	-9.03377e-06	1.23422e-05
cg21679391	6.80022e-05	0.000196229	0.729484	-0.000319929	0.000455934
cg21118819	9.22782e-05	0.000106354	0.384959	-0.000117976	0.000302532
cg03722312	6.71838e-05	0.000116575	0.565355	-0.000163277	0.000297645
cg11414742	1.77291e-06	7.25139e-05	0.980593	-0.000141582	0.000145128
cg15472728	-7.34518e-08	4.29979e-05	0.998633	-8.50774e-05	8.49305e-05
cg14270725	-4.13062e-05	0.000102939	0.688843	-0.00024481	0.000162198
cg15386434	-0.000164665	0.000115952	0.156047	-0.000393894	6.45649e-05
cg16006120	-0.000234272	0.00016034	0.146547	-0.000551254	8.27094e-05
cg14793596	-6.82382e-05	0.00013959	0.628603	-0.000344199	0.000207722
cg07284273	-0.000123137	0.000104403	0.23871	-0.000329534	8.32611e-05
cg25063151	-0.000298299	0.00018536	0.113305	-0.000664743	6.81447e-05
cg19436320	-8.38542e-05	0.000145777	0.568926	-0.000372046	0.000204338
cg00040588	-9.24898e-05	0.000135695	0.497087	-0.000360749	0.000175769
cg10482508	-0.000150678	0.000220724	0.499455	-0.000587035	0.000285679
cg27399052	5.86664e-06	4.77206e-05	0.902026	-8.84736e-05	0.000100207
cg12478066	9.52484e-05	6.97175e-05	0.175836	-4.25783e-05	0.000233075
cg23036947	5.02132e-05	6.03454e-05	0.407072	-6.90856e-05	0.000169512
cg17132079	-5.04143e-05	8.98378e-05	0.572859	-0.000228017	0.000127189
cg03397519	-1.78194e-05	5.92783e-05	0.765152	-0.000135009	9.93697e-05
cg22273474	8.05378e-05	0.000153717	0.599022	-0.000223351	0.000384426
cg18550476	4.30794e-05	0.00017164	0.803484	-0.000296242	0.000382401
cg00970622	0.000173471	0.000195931	0.37942	-0.00021387	0.000560813
cg01198994	8.65109e-05	0.000162358	0.591254	-0.000234459	0.000407481
cg23973885	2.04099e-05	0.000131772	0.876669	-0.000240094	0.000280913
cg13393580	0.000180474	0.000191465	0.350739	-0.000198039	0.000558986
cg26108719	-1.24553e-05	0.000107215	0.906743	-0.000224412	0.000199502
cg13354934	8.56649e-05	7.60497e-05	0.261243	-6.46802e-05	0.00023601
cg20426768	0.000100368	9.89965e-05	0.310156	-9.53415e-05	0.000296077
cg24153574	-3.68694e-05	9.19575e-05	0.68907	-0.000218663	0.000144924
cg23569098	0.000111737	0.000116508	0.343963	-0.000118592	0.000342066
cg21165029	9.42696e-05	0.000109239	0.392569	-0.000121689	0.000310229
cg12915036	8.03274e-05	0.000130613	0.53962	-0.000177886	0.000338541
cg03400623	0.000131552	0.000127204	0.304049	-0.00011992	0.000383025
cg22109675	0.000190963	0.0001286	0.146	-6.32702e-05	0.000445197
cg15492552	0.000144067	7.99457e-05	0.077404	-1.39801e-05	0.000302114
cg05572157	0.000138278	0.000161597	0.397886	-0.000181187	0.000457744
cg18534079	0.000112876	0.000135015	0.402937	-0.000154039	0.000379791
cg00046914	-3.08489e-05	7.56532e-05	0.68457	-0.00018041	0.000118712
cg02416993	7.85158e-05	0.000100397	0.43367	-0.000119961	0.000276993
cg07726485	3.42686e-05	6.37691e-05	0.590104	-9.17986e-05	0.000160336
cg23377249	-6.23864e-05	6.17314e-05	0.313528	-0.000184425	5.96525e-05
cg24356704	-6.70246e-05	3.91614e-05	0.0933091	-0.000144444	1.03947e-05
cg27503832	-4.63781e-05	5.41397e-05	0.389768	-0.000153409	6.06524e-05
cg22643873	-3.99848e-05	6.27105e-05	0.526231	-0.000163959	8.39896e-05
cg05397857	5.54114e-05	7.32715e-05	0.453096	-8.94413e-05	0.000200264
cg05387269	-4.92692e-06	0.000132524	0.970153	-0.000266918	0.000257064
cg16342853	-1.33606e-05	6.75976e-05	0.841976	-0.000146996	0.000120275
cg14992101	2.24413e-05	3.43497e-05	0.520219	-4.54656e-05	9.03483e-05
cg09996760	-3.97511e-06	2.8218e-05	0.88753	-5.97602e-05	5.181e-05
cg09864992	-1.54717e-05	5.48535e-05	0.778901	-0.000123913	9.297e-05
cg14094639	-3.63381e-05	0.000122761	0.768941	-0.000279029	0.000206353
cg01508988	1.67984e-05	4.69923e-05	0.722251	-7.61021e-05	0.000109699
cg07395004	8.32484e-06	4.65552e-05	0.858734	-8.37117e-05	0.000100361
cg19871494	2.02083e-05	2.55489e-05	0.430487	-3.03001e-05	7.07168e-05
cg09741074	6.46036e-06	8.76652e-06	0.468484	-1.08705e-05	2.37912e-05
cg08433720	-4.71413e-06	6.3691e-06	0.455271	-1.73054e-05	7.87715e-06
cg21513204	9.58729e-07	5.89284e-06	0.871785	-1.0691e-05	1.26085e-05
cg15604233	5.41256e-06	7.45894e-06	0.475695	-9.33325e-06	2.01584e-05
cg11915315	-4.43534e-06	1.44975e-05	0.759409	-3.30959e-05	2.42253e-05
cg20048602	-2.60351e-05	5.61797e-05	0.644098	-0.000137098	8.50283e-05
cg20439722	-5.29648e-06	1.84645e-05	0.77473	-4.17996e-05	3.12066e-05
cg19823490	-3.74863e-05	2.03916e-05	0.0676403	-7.7799e-05	2.82641e-06
cg21478504	5.16411e-05	3.86039e-05	0.180989	-2.4676e-05	0.000127958
cg04615596	3.56071e-05	2.6657e-05	0.181767	-1.70919e-05	8.83061e-05
cg05364533	-7.16673e-06	6.29223e-06	0.256461	-1.9606e-05	5.27259e-06
cg15617543	-5.03172e-06	1.4857e-05	0.737415	-3.4403e-05	2.43396e-05
cg18546249	3.74183e-05	3.22555e-05	0.250025	-2.63486e-05	0.000101185
cg11552267	4.2617e-05	4.43202e-05	0.337693	-4.50011e-05	0.000130235
cg05589276	2.24585e-05	0.000101235	0.824658	-0.000177675	0.000222592
cg02144516	-7.75258e-05	6.9111e-05	0.262217	-0.000214154	5.9102e-05
cg20435334	-0.000132128	5.54657e-05	0.0184937	-0.00024178	-2.24763e-05
cg26865478	-6.813e-06	6.39946e-05	0.91494	-0.000133326	0.0001197
cg16361266	-6.92198e-05	5.67978e-05	0.227637	-0.000181505	4.30656e-05
cg20434150	3.05125e-05	6.08227e-05	0.618637	-8.97299e-05	0.000150755
cg08253842	-4.8152e-05	5.10466e-05	0.34353	-0.000149068	5.27637e-05
cg14224772	2.82436e-05	8.95633e-05	0.751839	-0.000148817	0.000205304
cg03322002	7.2058e-05	3.31485e-05	0.0323129	6.52563e-06	0.00013759
cg08109545	-1.49131e-05	2.42231e-05	0.535737	-6.28005e-05	3.29743e-05
cg12033178	-8.11694e-06	1.98722e-05	0.683073	-4.7403e-05	3.11691e-05
cg08158776	-6.10918e-06	2.86377e-05	0.831095	-6.2724e-05	5.05057e-05
cg04880874	1.09736e-05	2.04617e-05	0.590463	-2.94777e-05	5.14249e-05
cg15588177	-1.60342e-05	1.25577e-05	0.203619	-4.08598e-05	8.79147e-06
cg22232737	-6.13454e-05	3.9245e-05	0.117975	-0.00013893	1.62393e-05
cg01006034	4.52705e-05	2.8516e-05	0.117872	-1.11038e-05	0.000101645
cg23621766	4.95132e-05	4.12031e-05	0.229307	-3.19426e-05	0.000130969
cg06903451	4.8893e-05	5.55633e-05	0.380806	-6.09518e-05	0.000158738
cg07284402	-9.83419e-06	3.00573e-05	0.745646	-6.92554e-05	4.95871e-05
cg03774228	2.97493e-05	3.41704e-05	0.384451	-3.78033e-05	9.73019e-05
cg23209302	3.63081e-05	6.52195e-05	0.577691	-9.26264e-05	0.000165243
cg01399319	-7.40225e-05	6.09159e-05	0.220777	-0.000194449	4.64041e-05
cg21264396	9.46995e-05	4.43056e-05	0.0331362	7.11028e-06	0.000182289
cg19236733	-4.40218e-05	2.68858e-05	0.102823	-9.71732e-05	9.12961e-06
cg08647342	5.30841e-05	4.02685e-05	0.194782	-2.6524e-05	0.000132692
cg18087716	2.42605e-05	5.66091e-05	0.666916	-8.76519e-05	0.000136173
cg17014728	-1.29474e-05	5.52787e-05	0.814506	-0.00012223	9.63347e-05
cg04988279	-0.00019294	8.14391e-05	0.0186945	-0.00035394	-3.1941e-05
cg13323817	1.54647e-06	4.38336e-05	0.971799	-8.51095e-05	8.82025e-05
cg22389936	2.42518e-05	3.10572e-05	0.429953	-3.71461e-05	8.56498e-05
cg26303572	-2.81782e-05	2.10976e-05	0.186278	-6.98866e-05	1.35303e-05
cg01648457	3.35842e-06	3.25049e-05	0.917983	-6.09016e-05	6.76184e-05
cg04481810	3.13787e-05	8.37335e-05	0.706407	-0.000134157	0.000196914
cg24837149	-2.01325e-05	7.20542e-05	0.780077	-0.000162579	0.000122314
cg16278124	4.40417e-05	3.56752e-05	0.21544	-2.64857e-05	0.000114569
cg06817090	-9.96266e-07	9.31089e-06	0.915042	-1.94033e-05	1.74107e-05
cg16573386	-1.44395e-06	3.64686e-05	0.968509	-7.35399e-05	7.0652e-05
cg17397377	2.95166e-05	4.34402e-05	0.496775	-5.63616e-05	0.000115395
cg08470185	-3.04114e-07	4.97098e-06	0.951297	-1.01314e-05	9.52317e-06
cg13053783	1.51834e-06	4.3522e-06	0.728999	-7.08567e-06	1.01223e-05
cg22961467	-1.39582e-06	5.07851e-06	0.784446	-1.14357e-05	8.64405e-06
cg15130241	-4.85438e-06	4.99809e-06	0.33388	-1.47353e-05	5.0265e-06
cg08791782	1.57206e-08	7.37385e-06	0.998305	-1.45619e-05	1.45933e-05
cg25842896	6.57182e-06	2.1974e-05	0.76438	-3.68693e-05	5.00129e-05
cg00173405	-1.76164e-05	9.85048e-06	0.0761386	-3.70901e-05	1.85737e-06
cg03943717	4.2327e-06	2.67183e-05	0.875452	-4.85875e-05	5.7053e-05
cg23437836	-6.48812e-07	4.50319e-05	0.988521	-8.96739e-05	8.83762e-05
cg00968800	6.86148e-05	9.90933e-05	0.488076	-0.000127286	0.000264515
cg08163912	-0.000123194	7.08011e-05	0.0814015	-0.000263163	1.67747e-05
cg09064061	-9.0642e-05	6.45568e-05	0.169004	-0.000218266	3.69824e-05
cg24399028	6.65365e-06	4.07813e-05	0.871137	-7.39683e-05	8.72756e-05
cg20383673	3.7167e-06	2.11922e-05	0.862876	-3.81788e-05	4.56122e-05
cg14795268	1.95799e-05	6.59122e-05	0.765942	-0.000110724	0.000149884
cg11431291	-0.000100323	0.000104798	0.337079	-0.000307502	0.000106856
cg21439539	4.81211e-06	4.37998e-06	0.27276	-3.84681e-06	1.3471e-05
cg20275133	-1.5935e-05	3.00248e-05	0.597273	-7.52919e-05	4.3422e-05
cg16728516	-3.93555e-06	5.5998e-06	0.485032	-1.5006e-05	7.13487e-06
cg25769755	2.1773e-05	1.75104e-05	0.21785	-1.28439e-05	5.639e-05
cg11993086	1.40043e-05	1.17133e-05	0.231458	-9.15202e-06	3.71606e-05
cg26509139	-7.69448e-06	7.42922e-06	0.312064	-2.23815e-05	6.99258e-06
cg08387662	-1.71237e-05	5.52974e-05	0.756839	-0.000126443	9.21955e-05
cg05595602	-2.72245e-06	5.53377e-06	0.628419	-1.36623e-05	8.21743e-06
cg25397779	2.03407e-05	2.27877e-05	0.370038	-2.4709e-05	6.53904e-05
cg12525514	3.81343e-06	1.29307e-05	0.768936	-2.17498e-05	2.93766e-05
cg25939543	-3.18666e-07	1.48411e-05	0.982958	-2.96586e-05	2.90212e-05
cg16661858	7.7622e-05	7.80164e-05	0.318791	-7.66109e-05	0.000231855
cg15863361	8.25272e-06	2.18018e-05	0.704478	-3.48479e-05	5.13533e-05
cg00009834	-1.54341e-06	7.89219e-05	0.984627	-0.000157567	0.00015448
cg27295412	6.23539e-05	5.53148e-05	0.254932	-4.69996e-05	0.000171707
cg25228593	-7.69404e-05	3.85242e-05	0.0450499	-0.0001531	-7.80772e-07
cg00060374	7.37158e-05	0.000157294	0.638246	-0.000237243	0.000384674
cg17507949	-0.000122404	0.000127096	0.337457	-0.000373665	0.000128857
cg22827694	-8.18075e-05	0.000176777	0.64239	-0.000431283	0.000267668
cg23894219	3.88839e-05	0.00015975	0.807753	-0.000276931	0.000354699
cg15633699	-0.000110029	0.000140771	0.438019	-0.000388324	0.000168266
cg10380643	1.01087e-05	8.76705e-05	0.909546	-0.00016321	0.000183427
cg20598347	-7.10562e-05	0.00013576	0.601965	-0.000339445	0.000197333
cg02668764	5.92175e-05	0.000109137	0.589841	-0.00015654	0.000274975
cg15081886	-2.74558e-05	0.000144248	0.850421	-0.000312625	0.000257713
cg23537515	1.00991e-05	0.000103282	0.922245	-0.000194082	0.00021428
cg12754273	-5.03584e-05	8.48266e-05	0.552139	-0.000218055	0.000117338
cg21281527	-2.39804e-05	0.000115547	0.837455	-0.000252409	0.000204448
cg15823872	-9.50521e-05	3.51744e-05	0.00759342	-0.000164589	-2.55147e-05
cg24555071	-0.000115845	0.000133449	0.38664	-0.000379664	0.000147973
cg12286462	-0.000161094	0.00011498	0.172011	-0.000388401	6.62131e-05
cg01721822	1.34872e-05	6.4441e-05	0.834414	-0.000113908	0.000140883
cg21285198	7.49073e-05	0.000181343	0.680912	-0.000283595	0.00043341
cg00305774	-1.88814e-05	0.000277898	0.945983	-0.000568268	0.000530505
cg22517356	-0.000102481	0.000161638	0.528521	-0.000422028	0.000217066
cg17265051	-3.63578e-05	8.32168e-05	0.665973	-0.000200872	0.000128156
cg23795938	-0.000109462	0.000154503	0.483529	-0.000414903	0.000195979
cg10156298	-7.47306e-05	0.000192913	0.700165	-0.000456106	0.000306645
cg09368716	-8.44201e-05	9.03349e-05	0.356955	-0.000263006	9.41657e-05
cg12208770	2.90015e-05	9.07481e-05	0.751613	-0.000150401	0.000208404
cg26863172	-0.00015004	0.000138172	0.278528	-0.000423196	0.000123117
cg13169132	0.000115049	0.000225529	0.611881	-0.000330807	0.000560904
cg17142722	-5.59026e-06	8.02014e-06	0.481187	-2.14455e-05	1.0265e-05
cg04897188	1.47236e-05	1.36477e-05	0.283063	-1.2257e-05	4.17041e-05
cg07010566	-6.01184e-05	0.000182142	0.73987	-0.0004202	0.000299963
cg14902621	-5.31437e-05	3.68218e-05	0.148665	-0.000125938	1.96506e-05
cg26373274	2.27686e-05	5.5145e-05	0.680008	-8.62493e-05	0.000131786
cg22351666	0.000156437	9.802e-05	0.11169	-3.73418e-05	0.000350216
cg05235651	0.000103185	8.29032e-05	0.214939	-6.07093e-05	0.000267079
cg04865726	2.29947e-05	3.45886e-05	0.512858	-4.53846e-05	9.13739e-05
cg04384590	-3.57726e-05	7.77115e-05	0.648225	-0.000189403	0.000117858
cg19071098	-0.000121736	0.00013142	0.358486	-0.000381545	0.000138073
cg08123463	-9.56098e-05	0.000137072	0.485399	-0.000366592	0.000175373
cg16496742	-2.07978e-05	0.00018311	0.909757	-0.000382793	0.000341198
cg26394870	0.000129561	0.000115102	0.265226	-9.79876e-05	0.00035711
cg19270739	0.000163893	7.4821e-05	0.0315127	1.59771e-05	0.000311809
cg21837069	0.00013356	0.00012476	0.280328	-0.000113082	0.000380203
cg00702126	4.40705e-05	9.73754e-05	0.652593	-0.000148434	0.000236575
cg14667273	2.53439e-05	7.53823e-05	0.738005	-0.000123682	0.00017437
cg27391934	8.24787e-05	0.000107824	0.452152	-0.000130682	0.00029564
cg07898743	1.02304e-05	7.10978e-05	0.887305	-0.000130325	0.000150786
cg20138749	0.00011237	0.000125264	0.37645	-0.000135267	0.000360008
cg16784215	0.000160282	0.00012885	0.216721	-9.44455e-05	0.00041501
cg07232890	6.2038e-05	9.42424e-05	0.514599	-0.000124273	0.000248349
cg08589721	-8.67167e-06	7.03165e-05	0.901639	-0.000147683	0.000130339
cg14271665	2.90954e-05	4.47671e-05	0.517515	-5.9406e-05	0.000117597
cg02896318	3.7973e-05	5.1886e-05	0.465801	-6.4602e-05	0.000140548
cg25234611	3.68599e-05	2.53616e-05	0.141642	-1.32782e-05	8.6998e-05
cg09668627	-8.96437e-05	0.000129094	0.495098	-0.000344853	0.000165566
cg08161163	-7.86158e-05	9.01929e-05	0.382806	-0.000256921	9.96893e-05
cg26798702	-0.000111629	7.07269e-05	0.115318	-0.000251451	2.81933e-05
cg09843049	1.00559e-05	9.62368e-05	0.917329	-0.000180198	0.000200309
cg20255272	-0.000223267	7.906e-05	0.00556639	-0.000379563	-6.69707e-05
cg13897675	-2.94216e-06	1.59263e-05	0.855732	-3.44273e-05	2.8543e-05
cg09860601	-0.000110794	8.58582e-05	0.19612	-0.000280529	5.89423e-05
cg19639479	-1.44533e-05	3.39496e-05	0.67115	-8.15693e-05	5.26628e-05
cg09603935	2.00733e-06	1.62471e-05	0.902215	-3.01121e-05	3.41267e-05
cg03116557	-6.55745e-06	3.85731e-05	0.864956	-8.28138e-05	6.96989e-05
cg13570957	-0.000154259	6.5997e-05	0.0200602	-0.00028473	-2.3787e-05
cg26795248	0.000111264	0.000100909	0.271897	-8.82268e-05	0.000310754
cg25592215	-0.000153275	4.63364e-05	0.00124812	-0.000244879	-6.16714e-05
cg08426733	-1.52457e-05	5.40098e-05	0.779644	-0.000122019	9.1528e-05
cg08270205	2.2994e-05	9.75098e-05	0.815825	-0.000169776	0.000215764
cg15099879	-0.000140483	7.854e-05	0.0749057	-0.000295751	1.4785e-05
cg06786804	0.0001084	6.51148e-05	0.097629	-2.03278e-05	0.000237127
cg24492273	-6.9979e-05	4.22234e-05	0.0987486	-0.000153452	1.34937e-05
cg00929633	7.67631e-05	9.51113e-05	0.420787	-0.000111266	0.000264792
cg21001441	4.83344e-05	7.95793e-05	0.542429	-0.000108988	0.000205657
cg12841328	9.58663e-06	7.29719e-05	0.895069	-0.000134674	0.000153847
cg02136596	-6.60509e-05	6.32329e-05	0.298783	-0.000191058	5.89563e-05
cg20219069	2.8959e-05	3.39395e-05	0.387061	-3.81371e-05	9.60552e-05
cg00599812	4.82452e-05	9.46404e-05	0.609727	-0.000138852	0.000235343
cg16669201	1.83998e-05	1.89162e-05	0.328488	-1.89962e-05	5.57959e-05
cg00528453	2.03145e-05	2.98177e-05	0.500737	-3.86331e-05	7.9262e-05
cg27383362	-5.57194e-05	5.6679e-05	0.327863	-0.00016777	5.63312e-05
cg15310231	-9.24548e-05	5.50491e-05	0.0945162	-0.000201283	1.63736e-05
cg26651722	-0.000107569	5.30083e-05	0.0440033	-0.000212363	-2.77513e-06
cg19682639	-1.97257e-05	6.52743e-05	0.76461	-0.000148768	0.000109317
cg13388025	-5.13755e-06	5.69462e-05	0.927982	-0.000117716	0.000107441
cg05894629	4.13619e-05	7.21927e-05	0.566764	-0.000101358	0.000184082
cg26226110	-5.86172e-05	9.09991e-05	0.518114	-0.000238516	0.000121282
cg07280242	-1.20172e-05	0.000108578	0.91167	-0.000226668	0.000202634
cg13798621	-1.65406e-05	0.000113381	0.884115	-0.000240688	0.000207606
cg04107003	1.14117e-05	8.62444e-05	0.895122	-0.000159088	0.000181911
cg17282836	-0.000122416	8.90673e-05	0.170401	-0.000298496	5.36638e-05
cg10522845	-8.7004e-05	6.72156e-05	0.195372	-0.000219885	4.58767e-05
cg24687970	5.85488e-05	0.000105551	0.582754	-0.000150119	0.000267217
cg04981940	-9.71735e-05	6.2968e-05	0.123256	-0.000221657	2.731e-05
cg17821649	-3.70149e-05	4.47064e-05	0.404702	-0.000125396	5.13666e-05
cg00391668	7.12005e-05	9.14736e-05	0.43925	-0.000109637	0.000252037
cg03742705	-8.55161e-05	4.82309e-05	0.0764822	-0.000180865	9.83315e-06
cg15875062	-1.32424e-05	1.01112e-05	0.190038	-3.32317e-05	6.74681e-06
cg10228629	-4.68377e-06	7.80647e-06	0.549876	-2.01166e-05	1.07491e-05
cg12723840	2.24512e-05	8.4372e-05	0.790392	-0.000144347	0.000189249
cg06377929	-6.32336e-06	2.96682e-05	0.832743	-6.49753e-05	5.23286e-05
cg10240778	-6.56092e-06	6.14195e-06	0.282157	-1.87031e-05	5.5813e-06
cg12909536	-3.92705e-05	5.90955e-05	0.505439	-0.000156098	7.75572e-05
cg12439834	-8.09651e-06	4.25895e-05	0.849133	-9.22931e-05	7.61e-05
cg02188411	-0.000106282	5.08326e-05	0.0373945	-0.000206774	-5.78936e-06
cg01768480	-3.13388e-07	4.36226e-05	0.994266	-8.65522e-05	8.59254e-05
cg23442023	-6.31353e-05	4.29567e-05	0.146945	-0.000148058	2.17872e-05
cg22306974	-7.91578e-05	4.0672e-05	0.0566858	-0.000159564	1.24799e-06
cg26317581	-1.99711e-05	1.717e-05	0.242026	-5.39149e-05	1.39727e-05
cg00695214	1.47843e-05	4.52671e-05	0.746573	-7.47057e-05	0.000104274
cg23735749	-3.37028e-06	2.07494e-05	0.870644	-4.43905e-05	3.76499e-05
cg25628057	1.95034e-06	3.69656e-05	0.957969	-7.11282e-05	7.50289e-05
cg23236382	1.3734e-05	6.99424e-05	0.845315	-0.000124537	0.000152005
cg24378791	-4.90635e-05	5.56874e-05	0.379013	-0.000159154	6.10267e-05
cg26042514	-3.11192e-06	1.78407e-05	0.862247	-3.83819e-05	3.2158e-05
cg13671768	1.21977e-06	3.1192e-05	0.968824	-6.04446e-05	6.28841e-05
cg06866635	-2.92848e-05	5.86533e-05	0.618989	-0.000145238	8.66687e-05
cg18387631	4.28927e-06	5.18559e-05	0.934526	-9.82263e-05	0.000106805
cg15101273	-8.09814e-05	9.14406e-05	0.377269	-0.000261753	9.97904e-05
cg09932694	8.28241e-06	1.07563e-05	0.454499	-1.2982e-05	2.95469e-05
cg17464271	-2.50964e-06	8.59423e-06	0.770594	-1.94999e-05	1.44806e-05
cg11103442	-1.48225e-05	2.59457e-05	0.566354	-6.61153e-05	3.64703e-05
cg22225258	-2.8439e-05	1.18061e-05	0.0165944	-5.17787e-05	-5.09919e-06
cg20230657	-1.4507e-06	6.78836e-06	0.830304	-1.48708e-05	1.19694e-05
cg08376055	1.33467e-05	1.81114e-05	0.464119	-2.24583e-05	4.91516e-05
cg12648677	-2.43408e-06	5.09274e-06	0.632297	-1.25021e-05	7.63391e-06
cg06128920	3.54004e-06	5.96268e-06	0.5558	-8.24778e-06	1.53279e-05
cg21124756	8.19206e-06	5.55027e-06	0.148168	-2.78044e-06	1.91646e-05
cg24729577	2.85929e-06	6.68408e-06	0.671816	-1.03547e-05	1.60733e-05
cg14651254	1.10378e-05	6.64144e-05	0.867236	-0.000120259	0.000142335
cg11794959	1.65578e-05	7.33118e-05	0.821273	-0.000128375	0.00016149
cg11722969	-2.11204e-05	3.60056e-05	0.555834	-9.2301e-05	5.00601e-05
cg19517490	-0.000109355	8.31213e-05	0.196974	-0.000273681	5.49696e-05
cg13321900	-0.000135126	6.16164e-05	0.029466	-0.000256937	-1.33147e-05
cg06793307	-9.19778e-06	2.35618e-05	0.697501	-5.57778e-05	3.73823e-05
cg17498856	1.18806e-05	8.11705e-06	0.147202	-4.16621e-06	2.79275e-05
cg17848002	1.03158e-05	1.35528e-05	0.446327	-1.64772e-05	3.71088e-05
cg17590292	-2.89419e-05	2.30707e-05	0.213279	-7.45512e-05	1.66674e-05
cg24466671	-1.88584e-07	3.04318e-05	0.995102	-6.03503e-05	5.99731e-05
cg13893866	5.12852e-05	4.89439e-05	0.304674	-4.54736e-05	0.000148044
cg17445140	1.74946e-05	4.60336e-05	0.704153	-7.35107e-05	0.0001085
cg23933399	-1.93868e-05	7.81465e-06	0.0175744	-3.48359e-05	-3.93782e-06
cg07808701	9.42945e-06	5.61489e-05	0.865688	-0.000101573	0.000120432
cg17271658	-1.48223e-05	2.07569e-05	0.479924	-5.58574e-05	2.62127e-05
cg23590525	-5.79673e-05	9.86208e-05	0.554433	-0.000252934	0.000136999
cg09259608	4.75497e-05	7.52265e-05	0.529599	-0.000101168	0.000196267
cg20958600	-0.000108372	7.35763e-05	0.143544	-0.000253827	3.70833e-05
cg07835437	-1.95396e-05	5.84169e-05	0.739894	-0.000135026	9.59467e-05
cg03041030	-1.26623e-06	3.768e-05	0.973273	-7.57571e-05	7.32246e-05
cg12983196	-9.50112e-05	7.17065e-05	0.186916	-0.00023677	4.67477e-05
cg09151801	-4.88666e-05	7.89428e-05	0.536576	-0.000204931	0.000107198
cg11526073	4.77785e-05	6.61039e-05	0.467474	-8.29045e-05	0.000178461
cg15844005	-5.65053e-05	9.30238e-05	0.550469	-0.000240407	0.000127396
cg27301475	-0.000159327	7.49095e-05	0.0350644	-0.000307418	-1.1236e-05
cg06205922	-0.000157038	7.89805e-05	0.0516646	-0.000313177	-8.98608e-07
cg01536190	-9.53981e-05	6.81708e-05	0.165083	-0.000230167	3.93709e-05
cg27047577	-0.000100588	0.000125598	0.431775	-0.000348887	0.000147711
cg14434115	-5.9009e-05	0.000112746	0.600701	-0.000281899	0.000163881
cg11917182	-0.000200644	7.60367e-05	0.0090276	-0.000350963	-5.03246e-05
cg02068237	-0.000152131	6.91683e-05	0.0284356	-0.000288872	-1.53905e-05
cg12270813	-6.8609e-06	0.000104107	0.948055	-0.000212673	0.000198951
cg03724010	-3.81132e-05	6.88417e-05	0.580376	-0.000174209	9.79822e-05
cg13804574	-3.35923e-05	5.95598e-05	0.570714	-0.000151338	8.41534e-05
cg16037137	-4.51731e-05	8.03238e-05	0.578515	-0.000203968	0.000113622
cg12632610	4.76452e-05	4.69452e-05	0.31608	-4.51623e-05	0.000140453
cg16001723	1.55064e-05	2.63357e-05	0.55718	-3.65574e-05	6.75702e-05
cg13850380	-5.55664e-06	4.55278e-05	0.903641	-9.5562e-05	8.44487e-05
cg00813378	-6.42889e-05	6.08152e-05	0.297308	-0.000184516	5.59387e-05
cg08738570	-3.22209e-05	2.58439e-05	0.215189	-8.33126e-05	1.88708e-05
cg22497741	3.00913e-06	8.26143e-06	0.715073	-1.33232e-05	1.93414e-05
cg16306898	-9.76451e-06	8.40132e-06	0.248738	-2.63734e-05	6.84433e-06
cg16601494	-8.55911e-06	6.11693e-06	0.163707	-2.06519e-05	3.53364e-06
cg15487867	-4.53668e-06	7.88101e-06	0.570476	-2.01169e-05	1.10435e-05
cg18430990	8.15695e-05	5.09242e-05	0.116923	-1.91041e-05	0.000182243
cg23244095	7.02758e-05	8.38333e-05	0.407372	-9.54568e-05	0.000236008
cg18114463	-5.76091e-05	6.93165e-05	0.400927	-0.000194643	7.94249e-05
cg09612202	6.74485e-05	7.75325e-05	0.38162	-8.58279e-05	0.000220725
cg26602477	-3.14326e-05	5.90456e-05	0.591509	-0.000148162	8.52966e-05
cg11811409	-1.84812e-05	7.86896e-05	0.813655	-0.000174045	0.000137083
cg26690297	3.68565e-05	8.47431e-05	0.664326	-0.000130675	0.000204388
cg08757091	7.09592e-05	6.48014e-05	0.276448	-5.71486e-05	0.000199067
cg08464374	4.44553e-05	6.19214e-05	0.475921	-7.79591e-05	0.00016687
cg01802295	-0.000106516	8.70799e-05	0.220963	-0.000278667	6.56351e-05
cg13575252	-2.18986e-05	7.81111e-05	0.778497	-0.000176319	0.000132522
cg19619320	-0.00011421	8.40306e-05	0.175977	-0.000280332	5.19131e-05
cg11964810	-7.57628e-05	7.20852e-05	0.294165	-0.00021827	6.67448e-05
cg21173317	-2.92662e-06	8.31316e-05	0.971995	-0.000167272	0.000161419
cg03392564	6.02544e-05	3.33413e-05	0.071699	-5.65898e-06	0.000126168
cg00955674	1.75576e-05	0.000119492	0.883499	-0.00021867	0.000253786
cg03941625	4.69698e-05	3.9458e-05	0.236457	-3.10359e-05	0.000124975
cg10347735	-5.99083e-05	4.67867e-05	0.202392	-0.000152402	3.25858e-05
cg07381470	-1.12084e-06	3.47328e-05	0.974479	-6.97853e-05	6.75436e-05
cg24470133	9.11428e-06	2.19852e-05	0.678926	-3.43489e-05	5.25774e-05
cg00355315	-2.30213e-06	4.80422e-06	0.636704	-1.17997e-05	7.19548e-06
cg04349378	1.24198e-05	0.000107749	0.907991	-0.000200593	0.000225433
cg12734710	0.00011046	0.000141777	0.436679	-0.000169823	0.000390743
cg01058717	-0.000203794	0.000139661	0.150834	-0.000479894	7.23064e-05
cg14194384	-8.08931e-05	8.568e-05	0.351643	-0.000250277	8.84903e-05
cg16305094	-7.34801e-05	3.76441e-05	0.0532054	-0.0001479	9.39775e-07
cg07229301	-3.08261e-05	7.48528e-05	0.68179	-0.000178805	0.000117153
cg18312113	-1.98044e-05	2.97394e-05	0.507388	-7.85972e-05	3.89884e-05
cg05888763	-5.23681e-06	3.2018e-05	0.870531	-6.85342e-05	5.80606e-05
cg07426077	0.000136764	0.000109965	0.211937	-8.06296e-05	0.000354158
cg02871542	-7.26184e-05	9.10489e-05	0.429734	-0.000252616	0.000107379
cg22373622	-2.31218e-05	5.64844e-05	0.682804	-0.000134788	8.8544e-05
cg26908276	-4.0081e-05	2.25852e-05	0.083613	-8.47303e-05	4.56828e-06
cg06069740	1.58447e-05	7.49327e-05	0.834654	-0.000132292	0.000163982
cg09073059	2.26469e-05	6.94051e-05	0.75103	-0.000114562	0.000159856
cg16277776	7.73755e-05	7.87332e-05	0.32853	-7.82746e-05	0.000233026
cg07211239	1.37343e-05	6.04476e-05	0.81903	-0.000105766	0.000133235
cg09517190	-9.31979e-07	2.83126e-05	0.973708	-5.69041e-05	5.50402e-05
cg08140609	0.000111911	0.000163229	0.496943	-0.000210782	0.000434603
cg20140735	5.47771e-06	7.99806e-05	0.946004	-0.000152638	0.000163594
cg24044259	-1.9471e-05	4.95645e-05	0.691422	-0.000117457	7.85147e-05
cg18368516	-2.37082e-05	1.42722e-05	0.096653	-5.19235e-05	4.50699e-06
cg12062537	8.77696e-06	8.38432e-06	0.295761	-7.79827e-06	2.53522e-05
cg14442715	9.07905e-06	4.75489e-05	0.847491	-8.49218e-05	0.00010308
cg19910128	-3.77431e-05	3.39426e-05	0.273122	-0.000104845	2.93592e-05
cg06089960	-2.90353e-05	7.18985e-05	0.6849	-0.000171174	0.000113103
cg17968925	7.39387e-07	4.06471e-05	0.985416	-7.96172e-05	8.1096e-05
cg03710092	-1.43342e-06	2.22854e-05	0.948546	-4.54901e-05	4.26233e-05
cg13431342	-4.16314e-05	6.22951e-05	0.50519	-0.000164785	8.15218e-05
cg08947289	-5.60088e-05	3.11635e-05	0.073827	-0.000117617	5.59921e-06
cg20490900	-0.00010124	0.000116818	0.388704	-0.00033218	0.000129701
cg04218845	4.82758e-06	0.000257448	0.98524	-0.000504129	0.000513784
cg00784654	-9.03809e-05	0.000258034	0.728085	-0.000600496	0.000419734
cg12690016	-8.59479e-06	1.99196e-05	0.664602	-4.79745e-05	3.07849e-05
cg25018209	-1.58373e-05	1.36706e-05	0.245455	-4.28631e-05	1.11884e-05
cg11586519	-7.02548e-05	4.05888e-05	0.0894128	-0.000150496	9.98641e-06
cg23443459	7.42377e-06	6.81939e-06	0.283059	-6.0577e-06	2.09052e-05
cg04637864	-2.66658e-06	4.50644e-06	0.552224	-1.15755e-05	6.24234e-06
cg19158176	5.55178e-06	1.79746e-05	0.767912	-2.99828e-05	4.10864e-05
cg13424097	1.89163e-05	2.26647e-05	0.402769	-2.58903e-05	6.37229e-05
cg07090025	2.56668e-05	3.8135e-05	0.500384	-4.97235e-05	0.000101057
cg06199750	1.05884e-05	8.95881e-06	0.238117	-7.12256e-06	2.82993e-05
cg05433637	-5.94899e-06	1.96385e-05	0.766215	-4.47729e-05	3.28749e-05
cg08271362	-3.09761e-05	2.99424e-05	0.307655	-9.01702e-05	2.82179e-05
cg20755353	-9.83879e-06	3.25154e-05	0.761298	-7.41195e-05	5.44419e-05
cg05338320	-9.35393e-05	0.000132031	0.480798	-0.000354556	0.000167477
cg16848272	-2.24276e-05	0.00016773	0.894199	-0.000354018	0.000309163
cg04652884	-6.97191e-05	7.8152e-05	0.37911	-0.00022422	8.4782e-05
cg14279825	-2.58017e-05	3.78663e-05	0.495187	-0.000100661	4.90573e-05
cg05702207	1.22324e-05	4.37862e-05	0.779721	-7.433e-05	9.87948e-05
cg00151676	-1.98994e-05	2.15922e-05	0.354707	-6.25857e-05	2.2787e-05
cg13316116	2.02913e-06	8.41804e-05	0.980782	-0.00016439	0.000168448
cg05934012	-3.55186e-05	3.25327e-05	0.278177	-9.98336e-05	2.87963e-05
cg07479014	-6.94234e-06	8.19704e-05	0.933014	-0.000168992	0.000155108
cg09126090	-4.63587e-05	9.63887e-05	0.625571	-0.000236913	0.000144195
cg16358446	1.82157e-06	4.75522e-06	0.702052	-7.57916e-06	1.12223e-05
cg08289140	5.9948e-06	5.74177e-06	0.306729	-5.35628e-06	1.73459e-05
cg11521998	-9.44379e-05	6.34965e-05	0.138123	-0.000219966	3.10902e-05
cg09172260	-0.000151089	6.0425e-05	0.0135708	-0.000270545	-3.16333e-05
cg15158067	-4.89906e-05	6.52491e-05	0.450267	-0.000177984	8.00025e-05
cg21240031	5.24948e-05	7.38465e-05	0.477833	-9.34947e-05	0.000198484
cg26680206	-4.29915e-05	6.05977e-05	0.484325	-0.000162789	7.68059e-05
cg15034659	-2.06341e-05	3.97054e-05	0.603665	-9.91289e-05	5.78606e-05
cg11649182	-5.99864e-05	8.66275e-05	0.48757	-0.000231243	0.00011127
cg25311963	-0.000126539	9.32229e-05	0.180367	-0.000310834	5.77565e-05
cg07147033	3.43033e-05	0.000140894	0.805403	-0.000244234	0.00031284
cg13897348	-0.000131975	0.000107052	0.214429	-0.00034361	7.96595e-05
cg19246761	-8.29304e-05	8.04338e-05	0.30127	-0.000241943	7.60818e-05
cg01229567	-0.000137461	0.000120006	0.253341	-0.000374705	9.9783e-05
cg15817635	-7.15103e-05	3.42969e-05	0.0372505	-0.000139313	-3.70772e-06
cg15652741	2.00886e-05	1.52043e-05	0.188282	-9.96927e-06	5.01466e-05
cg10705488	3.5673e-06	4.15331e-06	0.393561	-4.64351e-06	1.17781e-05
cg11140595	-2.06373e-06	5.01165e-06	0.682039	-1.19714e-05	7.84395e-06
cg06761793	1.60473e-06	4.42424e-06	0.720687	-7.14169e-06	1.03512e-05
cg18123911	2.38018e-06	4.76509e-06	0.624364	-7.04008e-06	1.18004e-05
cg17271960	6.223e-06	4.57644e-06	0.176667	-2.82431e-06	1.52703e-05
cg25004270	-3.32727e-06	9.3626e-06	0.723897	-2.18365e-05	1.5182e-05
cg25880288	3.65874e-06	9.70671e-06	0.70768	-1.55308e-05	2.28482e-05
cg08912129	-1.91784e-06	6.8632e-06	0.782575	-1.54859e-05	1.16502e-05
cg25164153	-2.22401e-07	5.40025e-06	0.967285	-1.08983e-05	1.04535e-05
cg26169249	4.4033e-06	4.37742e-06	0.309942	-4.25056e-06	1.30572e-05
cg07807975	3.01685e-05	3.01288e-05	0.316468	-2.93942e-05	8.97311e-05
cg25010770	-1.03052e-05	1.09161e-05	0.344073	-3.18856e-05	1.12751e-05
cg10756715	-7.94839e-06	8.23606e-06	0.333922	-2.42305e-05	8.33374e-06
cg05941212	2.12976e-05	4.10983e-05	0.604796	-5.99509e-05	0.000102546
cg13947830	3.85585e-05	6.85432e-05	0.572875	-9.69468e-05	0.000174064
cg26295592	-3.2603e-05	8.33468e-05	0.694348	-0.000197374	0.000132168
cg00781053	-5.78912e-05	2.64228e-05	0.028643	-0.000110127	-5.6551e-06
cg23605175	-7.7602e-06	1.9561e-05	0.693243	-4.64309e-05	3.09105e-05
cg15369276	-7.95983e-05	4.55993e-05	0.0809778	-0.000169745	1.05484e-05
cg25459752	4.66169e-05	2.77152e-05	0.0964961	-8.1742e-06	0.000101408
cg15558634	-2.0237e-05	1.57266e-05	0.197956	-5.13273e-05	1.08533e-05
cg15323084	8.80292e-05	4.8943e-05	0.0727074	-8.72776e-06	0.000184786
cg19165249	-1.4591e-05	7.19725e-05	0.839665	-0.000156876	0.000127694
cg09082814	-0.000118937	6.81074e-05	0.0830241	-0.00025358	1.5707e-05
cg23957653	-9.34592e-06	5.9972e-05	0.876815	-0.000127907	0.000109215
cg09061216	-1.24566e-05	2.19797e-05	0.574292	-5.5909e-05	3.09957e-05
cg03975652	8.37647e-05	6.42881e-05	0.195532	-4.33285e-05	0.000210858
cg25500853	3.0692e-07	4.03591e-05	0.993944	-7.94802e-05	8.0094e-05
cg04292080	-3.01455e-05	4.40417e-05	0.493686	-0.000117213	5.69219e-05
cg17456675	-8.9431e-05	7.66698e-05	0.244051	-0.000241002	6.214e-05
cg24090393	9.73664e-06	2.01762e-05	0.627876	-3.01504e-05	4.96237e-05
cg02492207	-5.11064e-05	8.35882e-05	0.540419	-0.000216355	0.000114142
cg10994397	-9.01816e-05	5.74926e-05	0.117519	-0.000203841	2.34772e-05
cg22689324	-3.27262e-05	9.39848e-05	0.731773	-0.000218528	0.000153075
cg06002660	-5.60261e-06	7.01854e-05	0.93616	-0.000144354	0.000133149
cg25900627	-0.00011478	5.00199e-05	0.022176	-0.000213666	-1.58941e-05
cg04854189	-6.00647e-06	4.21627e-05	0.886528	-8.93592e-05	7.73462e-05
cg06912282	-3.34045e-05	0.000113771	0.76933	-0.000258322	0.000191513
cg06080300	-3.45037e-05	5.23785e-05	0.510148	-0.000138052	6.9045e-05
cg09159050	1.21643e-05	6.96808e-06	0.0828429	-1.61107e-06	2.59398e-05
cg21129534	-1.01083e-05	8.90037e-06	0.259904	-2.77037e-05	7.48711e-06
cg00078456	-6.10511e-05	8.27526e-05	0.461335	-0.000224647	0.000102545
cg18852096	-0.00016752	7.61665e-05	0.0280351	-0.000318096	-1.69445e-05
cg05642789	-0.000107101	0.000159333	0.504328	-0.000422091	0.00020789
cg01621974	-0.000222102	0.000163587	0.174886	-0.000545503	0.000101298
cg17122213	-0.000256654	0.000140552	0.0688938	-0.000534515	2.12073e-05
cg03427058	-6.91257e-05	0.000139766	0.618492	-0.000345433	0.000207182
cg23430652	-0.000178043	9.06233e-05	0.0497485	-0.000357199	1.1129e-06
cg00297832	-0.000208184	0.000163154	0.203163	-0.000530727	0.00011436
cg24368383	-0.000278856	0.000146436	0.0594715	-0.000568349	1.0638e-05
cg04882394	-0.000110443	9.08764e-05	0.225338	-0.0002901	6.92132e-05
cg24535439	3.54926e-05	7.29957e-05	0.627878	-0.000108815	0.0001798
cg00262621	-3.22976e-05	6.71444e-05	0.629253	-0.000165037	0.000100442
cg08231710	6.02335e-05	0.000133509	0.656816	-0.000203705	0.000324172
cg06943420	3.32895e-05	8.66178e-05	0.70208	-0.000137948	0.000204527
cg11648594	-5.38098e-05	0.000160143	0.736478	-0.000370402	0.000262783
cg26740494	-8.79793e-05	0.000113792	0.439731	-0.000312938	0.00013698
cg05834878	4.90414e-05	5.70506e-05	0.389095	-6.37438e-05	0.000161827
cg26976576	-2.98989e-05	6.1596e-05	0.62433	-0.00015167	9.18722e-05
cg05419999	3.38553e-05	7.28465e-05	0.645327	-0.000110157	0.000177868
cg11798909	-1.56545e-05	7.25298e-05	0.829768	-0.000159041	0.000127732
cg26660744	-3.23998e-05	2.89677e-05	0.265619	-8.96669e-05	2.48673e-05
cg23252997	4.9213e-05	4.14818e-05	0.237354	-3.27937e-05	0.00013122
cg03484489	-0.000104083	4.50117e-05	0.0213946	-0.000193068	-1.5098e-05
cg00998168	6.2599e-06	5.54839e-06	0.262979	-4.70888e-06	1.72287e-05
cg18282011	3.23283e-06	2.58965e-05	0.90222	-4.79627e-05	5.44284e-05
cg21149807	-2.80823e-05	2.03771e-05	0.168999	-6.83666e-05	1.22019e-05
cg09283376	-4.46425e-05	4.9793e-05	0.370244	-0.00014308	5.37948e-05
cg20155988	-2.25151e-06	7.84943e-06	0.772924	-1.77693e-05	1.32663e-05
cg26562592	-5.40967e-05	3.15077e-05	0.0861562	-0.000116385	8.19192e-06
cg08864381	6.29543e-06	4.28335e-06	0.148897	-2.17245e-06	1.47633e-05
cg06848468	2.19375e-05	3.78365e-05	0.559558	-5.28627e-05	9.67376e-05
cg20255817	-1.11651e-06	5.19958e-06	0.830588	-1.13957e-05	9.16271e-06
cg22082145	7.33572e-06	5.19913e-05	0.889206	-9.54476e-05	0.000110119
cg07601058	-3.38887e-06	5.29384e-05	0.948906	-0.000108044	0.000101267
cg23210533	3.10145e-05	4.91062e-05	0.529607	-6.60651e-05	0.000128094
cg11809915	-1.27218e-06	7.41459e-06	0.864504	-1.59303e-05	1.3386e-05
cg17869988	3.04288e-06	6.40037e-05	0.962748	-0.000123488	0.000129574
cg03718254	-7.12144e-06	9.50214e-06	0.453652	-2.59065e-05	1.16636e-05
cg20106035	6.69676e-06	2.31916e-05	0.774053	-3.91515e-05	5.2545e-05
cg14626671	2.18987e-06	1.3628e-05	0.873076	-2.47518e-05	2.91316e-05
cg19382808	2.60137e-05	3.55857e-05	0.466931	-4.43367e-05	9.63642e-05
cg11530028	-7.76414e-06	2.24681e-05	0.734502	-5.21821e-05	3.66538e-05
cg03972505	4.86174e-06	3.17094e-05	0.877615	-5.78257e-05	6.75491e-05
cg06528340	2.79511e-05	1.65577e-05	0.0919891	-4.78231e-06	6.06845e-05
cg13077472	2.98115e-05	4.14818e-05	0.474506	-5.21951e-05	0.000111818
cg17939059	-9.41395e-05	8.93414e-05	0.299949	-0.000270761	8.24823e-05
cg18288914	-6.27177e-05	6.12357e-05	0.308224	-0.000183777	5.83411e-05
cg03548463	-2.45215e-05	3.42234e-05	0.483424	-9.21787e-05	4.31357e-05
cg09330116	-2.49788e-06	3.46944e-05	0.942544	-7.10863e-05	6.60905e-05
cg12655137	-0.000100638	8.16336e-05	0.219188	-0.000262022	6.07458e-05
cg20251225	1.70114e-05	0.00010267	0.868641	-0.000185961	0.000219983
cg20429981	8.00625e-06	0.000128185	0.950159	-0.000245406	0.000261419
cg01189072	-8.42624e-05	5.27592e-05	0.110299	-0.000188564	2.0039e-05
cg11588584	1.59584e-05	0.000110948	0.886122	-0.000203377	0.000235294
cg09825670	2.44212e-05	2.58616e-05	0.347506	-2.67053e-05	7.55477e-05
cg15079481	0.000296688	0.000131984	0.0283043	3.57639e-05	0.000557612
cg20462449	-0.000129378	9.86499e-05	0.193062	-0.000324402	6.56465e-05
cg21106418	-0.000276497	0.000207243	0.183508	-0.000686202	0.000133208
cg10065215	-2.38886e-05	7.35321e-05	0.746493	-0.000169256	0.000121479
cg12042834	-0.000106134	7.61399e-05	0.16888	-0.000256657	4.43896e-05
cg14976190	-5.51734e-05	0.000136428	0.694086	-0.000324881	0.000214535
cg19018051	-0.000150867	0.000105626	0.154102	-0.000359682	5.79475e-05
cg13440958	2.46194e-06	0.00012839	0.98482	-0.000251356	0.00025628
cg26114076	-4.98274e-05	3.31854e-05	0.136446	-0.000115433	1.57778e-05
cg06750152	-3.64811e-05	3.60832e-05	0.321074	-0.000107815	3.4853e-05
cg10626236	-5.42162e-05	9.89932e-05	0.583995	-0.000249919	0.000141487
cg11851198	-2.0546e-05	5.29532e-05	0.697404	-0.000125231	8.4139e-05
cg10628909	-6.0523e-05	5.53852e-05	0.275803	-0.000170016	4.89697e-05
cg20871579	-2.91286e-05	3.9785e-05	0.467438	-0.000107781	4.95237e-05
cg25558285	3.3763e-06	1.9253e-05	0.861821	-3.46856e-05	4.14382e-05
cg11198222	-3.98411e-05	2.83595e-05	0.165159	-9.59059e-05	1.62236e-05
cg25253065	-1.33347e-05	2.94239e-05	0.6528	-7.15037e-05	4.48343e-05
cg04243582	-4.08148e-05	4.48519e-05	0.36439	-0.000129484	4.78543e-05
cg11572942	-0.00018621	0.000118512	0.119383	-0.000420499	4.80793e-05
cg01677809	9.21034e-06	5.65842e-05	0.869721	-0.000102653	0.000121073
cg14054781	-4.97614e-05	4.968e-05	0.317355	-0.000147975	4.84525e-05
cg10162318	2.11912e-05	6.04099e-05	0.7256	-9.82351e-05	0.000140617
cg07808326	1.19945e-05	5.52747e-05	0.826503	-9.72799e-05	0.000121269
cg16324669	4.11439e-05	6.32141e-05	0.519061	-8.38259e-05	0.000166114
cg02332863	-4.50974e-05	5.89552e-05	0.443795	-0.000161648	7.1453e-05
cg16990280	4.00393e-05	5.8199e-05	0.4907	-7.50161e-05	0.000155095
cg01512113	-2.27763e-05	5.1426e-05	0.658277	-0.000124442	7.88893e-05
cg18763089	-3.25309e-05	0.000110393	0.768201	-0.000250771	0.000185709
cg14027380	-1.87453e-05	0.000100957	0.854471	-0.00021833	0.000180839
cg11163532	0.000122523	6.8703e-05	0.0738603	-1.32977e-05	0.000258344
cg22707691	9.38517e-05	7.39617e-05	0.20502	-5.23655e-05	0.000240069
cg10317445	-3.22822e-06	2.10373e-05	0.878425	-4.48175e-05	3.8361e-05
cg21580588	1.03897e-05	6.7844e-06	0.128794	-3.02265e-06	2.3802e-05
cg15260978	-3.75046e-05	6.08807e-05	0.537024	-0.000157862	8.28524e-05
cg12406875	-9.18163e-05	4.76018e-05	0.0548344	-0.000185922	2.28911e-06
cg05983502	7.9169e-06	2.96338e-05	0.791357	-5.06672e-05	6.6501e-05
cg17282211	-1.51944e-05	8.47769e-05	0.8585	-0.000182792	0.000152404
cg26342907	-4.88718e-07	9.16449e-06	0.957348	-1.86063e-05	1.76289e-05
cg11725331	7.96696e-05	7.03637e-05	0.26781	-5.94345e-05	0.000218774
cg07015961	3.50067e-06	1.83922e-05	0.84877	-3.28594e-05	3.98608e-05
cg10543797	-1.96358e-05	4.81223e-05	0.685831	-0.00011477	7.54987e-05
cg18947110	-2.32925e-05	7.55115e-05	0.760056	-0.000172573	0.000125988
cg09233730	-7.3808e-05	4.61165e-05	0.111664	-0.000164977	1.73611e-05
cg15688635	4.57319e-05	5.23629e-05	0.398746	-5.7786e-05	0.00014925
cg17010445	-0.000131951	5.88777e-05	0.0282459	-0.000248348	-1.5554e-05
cg09185911	-6.51458e-05	7.30376e-05	0.374293	-0.000209536	7.92446e-05
cg25031205	1.42279e-05	3.9641e-05	0.721635	-6.41396e-05	9.25954e-05
cg15578948	-9.5091e-06	6.43345e-06	0.144024	-2.22276e-05	3.2094e-06
cg04439557	-1.34477e-05	7.58473e-05	0.859739	-0.000163393	0.000136497
cg08122070	-4.19613e-05	4.01604e-05	0.290291	-0.000121356	3.7433e-05
cg05152432	2.1389e-05	3.55248e-05	0.550256	-4.88411e-05	9.16191e-05
cg07328316	0.000103458	0.000100522	0.301764	-9.52663e-05	0.000302183
cg22906442	-1.00635e-05	8.42187e-05	0.90547	-0.000176558	0.000156431
cg08937102	-2.27402e-06	8.59333e-05	0.978828	-0.000172158	0.00016761
cg15274273	3.73252e-05	9.47093e-05	0.693189	-0.000149909	0.000224559
cg11296110	8.35905e-05	8.00707e-05	0.295663	-7.47038e-05	0.000241885
cg03606098	6.84134e-06	8.86368e-05	0.938343	-0.000168387	0.00018207
cg18956079	9.7537e-05	7.38705e-05	0.18786	-4.84998e-05	0.000243574
cg12552303	5.48199e-05	5.2808e-05	0.296804	-4.95779e-05	0.000159218
cg00423114	-1.10307e-05	4.3248e-05	0.799707	-9.6529e-05	7.44676e-05
cg21692735	7.32416e-06	7.55207e-06	0.328117	-7.60576e-06	2.22541e-05
cg23159992	-2.99245e-06	3.24856e-05	0.926801	-6.72142e-05	6.12293e-05
cg14778560	-1.11268e-06	3.08149e-05	0.971452	-6.20317e-05	5.98064e-05
cg15851414	-0.000133018	6.95091e-05	0.056915	-0.000270433	4.39702e-06
cg15824543	-6.99848e-05	8.90411e-05	0.449735	-0.000246013	0.000106043
cg00992048	-0.000258751	0.000134117	0.0556331	-0.000523892	6.38886e-06
cg00343906	-5.47406e-06	4.17502e-05	0.897741	-8.80113e-05	7.70632e-05
cg27605903	-5.82171e-06	2.63078e-05	0.825387	-5.78304e-05	4.61869e-05
cg13185289	-8.55798e-05	0.000102365	0.40901	-0.000287947	0.000116788
cg09182189	8.27453e-05	3.92034e-05	0.0361762	5.24279e-06	0.000160248
cg17157064	-1.80703e-05	1.47126e-05	0.218287	-4.71561e-05	1.10155e-05
cg04407228	-9.8048e-06	2.15653e-05	0.64961	-5.2438e-05	3.28284e-05
cg10388316	7.44542e-06	5.20314e-06	0.158456	-2.84084e-06	1.77317e-05
cg00997530	-5.42168e-06	4.94478e-06	0.272936	-1.51972e-05	4.35382e-06
cg00328972	1.29646e-06	3.64089e-06	0.721955	-5.90133e-06	8.49425e-06
cg26421735	2.09575e-06	7.96183e-06	0.79291	-1.36442e-05	1.78357e-05
cg12523155	1.59796e-06	5.72711e-06	0.781011	-9.72414e-06	1.29201e-05
cg18509696	-4.18837e-06	5.50865e-06	0.448615	-1.50786e-05	6.70186e-06
cg25877525	-9.99433e-05	5.69868e-05	0.0810429	-0.000212602	1.27157e-05
cg20045172	-2.69078e-05	2.80412e-05	0.340446	-8.23434e-05	2.85277e-05
cg25852883	-1.90086e-05	2.19232e-05	0.391336	-6.23491e-05	2.4332e-05
cg09932345	5.9195e-05	3.60505e-05	0.102299	-1.20743e-05	0.000130464
cg02297801	-0.000193538	9.24889e-05	0.0380579	-0.000376382	-1.06937e-05
cg02400530	7.84767e-06	6.32269e-05	0.901607	-0.000117148	0.000132843
cg17266431	-9.552e-05	8.40971e-05	0.256543	-0.000261774	7.07343e-05
cg19114248	-2.82676e-05	8.00928e-05	0.724947	-0.000186606	0.00013007
cg05627004	-4.63288e-05	8.04119e-05	0.572612	-0.000205298	0.00011264
cg11837076	-0.000176231	0.000107994	0.105104	-0.000389727	3.72648e-05
cg18591364	-1.57436e-05	9.40025e-05	0.867676	-0.00020158	0.000170093
cg04157786	-4.72977e-05	0.000111916	0.674181	-0.000268547	0.000173952
cg14958032	-0.000122825	0.000115098	0.290556	-0.000350365	0.000104716
cg00735586	1.7847e-05	0.000119289	0.88157	-0.00021798	0.000253674
cg23678594	-4.76372e-05	6.93828e-05	0.496889	-0.000184802	8.95279e-05
cg22877644	1.1014e-05	2.97145e-05	0.708842	-4.77295e-05	6.97576e-05
cg23834034	-3.13858e-05	0.000128752	0.808655	-0.00028592	0.000223149
cg19083977	-9.86925e-05	7.41148e-05	0.188259	-0.000245212	4.78274e-05
cg02769781	-4.84578e-05	3.60446e-05	0.180917	-0.000119715	2.27999e-05
cg24163210	2.63288e-05	6.80336e-05	0.699903	-0.000108169	0.000160826
cg00558749	3.26121e-05	6.51769e-05	0.618047	-9.62381e-05	0.000161462
cg13461447	5.98951e-05	7.58646e-05	0.430807	-9.00841e-05	0.000209874
cg10207218	1.14274e-05	6.47109e-05	0.860169	-0.000116502	0.000139356
cg05262191	1.24014e-05	5.14141e-05	0.809989	-8.92407e-05	0.000114044
cg22376730	-3.78306e-05	7.85239e-05	0.632176	-0.000193067	0.000117406
cg04902899	-1.99613e-05	1.8178e-05	0.270791	-5.58978e-05	1.59753e-05
cg26568075	-0.000154074	5.60025e-05	0.0065709	-0.000264788	-4.33612e-05
cg25314445	1.29375e-05	3.40466e-05	0.703093	-5.43703e-05	8.02452e-05
cg12076692	3.03909e-05	2.4816e-05	0.222678	-1.86686e-05	7.94504e-05
cg13336641	-6.37792e-05	8.79627e-05	0.46814	-0.000237675	0.000110117
cg16418734	1.7471e-05	8.2949e-05	0.831788	-0.000146513	0.000181455
cg06843553	-6.31477e-05	6.19406e-05	0.306757	-0.0001856	5.93046e-05
cg09292319	-0.000129289	9.51146e-05	0.173444	-0.000317325	5.87456e-05
cg25666010	-9.18104e-06	3.0449e-05	0.76705	-6.93766e-05	5.10145e-05
cg25075731	6.09268e-06	3.08861e-05	0.844091	-5.4967e-05	6.71523e-05
cg25069266	-2.55193e-05	2.4546e-05	0.305653	-7.40451e-05	2.30065e-05
cg05722993	6.5516e-05	6.35627e-05	0.315295	-6.0143e-05	0.000191175
cg08820807	-7.71845e-05	0.000133114	0.564135	-0.000340342	0.000185973
cg15523212	-0.000128548	4.29223e-05	0.00322994	-0.000213403	-4.36936e-05
cg03335128	4.41151e-05	0.000146153	0.763686	-0.000244819	0.000333049
cg26793463	1.95164e-06	2.26579e-05	0.93132	-4.28415e-05	4.67448e-05
cg21422400	-3.44471e-05	4.45811e-05	0.442179	-0.000122581	5.36867e-05
cg25480982	-7.86852e-05	0.000145672	0.589335	-0.000366669	0.000209299
cg20732440	1.00614e-05	3.6205e-05	0.781386	-6.15135e-05	8.16363e-05
cg04397839	-1.23271e-05	1.78988e-05	0.486914	-4.77119e-05	2.30577e-05
cg01729401	-3.43579e-05	3.29967e-05	0.302642	-9.95901e-05	3.08743e-05
cg02948693	9.55624e-05	0.000145587	0.512706	-0.000192252	0.000383377
cg27021587	-0.000199835	0.000118314	0.100361	-0.000433734	3.40637e-05
cg05368896	-5.49992e-05	0.000130301	0.672655	-0.000312595	0.000202596
cg12134886	-0.000156041	0.000131817	0.239815	-0.000416633	0.000104552
cg01205154	-8.98917e-05	7.61054e-05	0.242222	-0.000240347	6.05635e-05
cg09535746	0.000161304	0.000111638	0.150536	-5.93961e-05	0.000382005
cg07068709	1.05489e-05	0.000140729	0.941384	-0.000267663	0.000288761
cg04260676	5.13491e-05	7.36829e-05	0.480846	-9.43169e-05	0.000197015
cg05813612	5.48149e-05	0.000220576	0.80623	-0.000381248	0.000490878
cg18821813	-2.77624e-06	2.78993e-05	0.92244	-5.79313e-05	5.23788e-05
cg14527423	1.33708e-06	0.000142858	0.992599	-0.000281084	0.000283758
cg16677144	7.69493e-06	1.77623e-05	0.669805	-2.74199e-05	4.28098e-05
cg14953148	4.09984e-05	0.000103206	0.691491	-0.000163032	0.000245029
cg12072340	-8.1418e-05	0.000111639	0.465906	-0.00030212	0.000139284
cg18162783	-9.13478e-05	8.98555e-05	0.310879	-0.000268986	8.62903e-05
cg04994975	-8.26007e-05	7.17579e-05	0.251528	-0.000224461	5.92596e-05
cg26147268	1.84284e-05	9.18322e-05	0.84061	-0.000163118	0.000199974
cg05925326	5.60798e-05	8.65353e-05	0.515719	-0.000114995	0.000227154
cg25599619	4.06152e-05	8.04094e-05	0.613193	-0.000118349	0.000199579
cg09503310	-3.41443e-05	3.09658e-05	0.270239	-9.53615e-05	2.70729e-05
cg03445765	9.59636e-05	0.000100489	0.34371	-0.000102695	0.000294622
cg11836949	-0.000208068	0.000190531	0.287046	-0.000584735	0.000168599
cg07432009	8.88512e-05	0.000130093	0.492849	-0.000168335	0.000346037
cg03043696	-6.71423e-07	8.12751e-05	0.99335	-0.000161347	0.000160004
cg19340909	-0.000130614	7.16475e-05	0.0682666	-0.000272256	1.1028e-05
cg03716942	3.1302e-06	7.05095e-06	0.659506	-1.0809e-05	1.70694e-05
cg06196161	1.99454e-06	8.6105e-06	0.816719	-1.50278e-05	1.90169e-05
cg23891190	-1.70513e-05	1.50482e-05	0.261135	-4.68005e-05	1.26979e-05
cg01821754	2.02509e-05	2.8403e-05	0.48334	-3.58999e-05	7.64017e-05
cg17483139	4.35703e-06	5.78742e-06	0.454055	-7.0843e-06	1.57984e-05
cg04266169	-5.77729e-05	7.22153e-05	0.416212	-0.000200538	8.49917e-05
cg15827003	2.20602e-05	3.22926e-05	0.50017	-4.17801e-05	8.59006e-05
cg18854735	-3.90208e-05	5.23344e-05	0.453894	-0.000142482	6.44407e-05
cg12150066	-3.57737e-05	2.86295e-05	0.211781	-9.23722e-05	2.08248e-05
cg23982607	-7.30284e-05	6.49089e-05	0.264234	-0.000201349	5.52921e-05
cg07380540	0.000150799	0.000121601	0.215357	-8.95983e-05	0.000391196
cg16652392	2.70236e-05	8.4589e-05	0.748818	-0.000140203	0.00019425
cg26492771	-0.000120207	6.15828e-05	0.0512593	-0.000241952	1.53762e-06
cg21776599	1.96094e-05	6.78608e-05	0.770979	-0.000114547	0.000153766
cg24706992	-2.96991e-05	6.36565e-05	0.641967	-0.000155544	9.61454e-05
cg23936745	6.46832e-05	2.49843e-05	0.0105163	1.52909e-05	0.000114075
cg00007800	-1.39451e-05	7.81524e-05	0.858901	-0.000168447	0.000140557
cg09809474	-1.08943e-05	3.16264e-05	0.733506	-7.34176e-05	5.1629e-05
cg13918235	3.42759e-06	1.69993e-05	0.841299	-3.01788e-05	3.7034e-05
cg16384593	1.39067e-05	3.04891e-05	0.649701	-4.63681e-05	7.41814e-05
cg00309462	-2.21909e-06	1.02399e-05	0.829279	-2.24626e-05	1.80245e-05
cg16926213	0.000128846	0.00016759	0.440551	-0.000202468	0.000460161
cg09628503	-2.06264e-05	3.7207e-05	0.578602	-9.41822e-05	5.29293e-05
cg22850508	5.80811e-05	7.92132e-05	0.460549	-9.8518e-05	0.00021468
cg15102821	-8.36623e-05	9.09269e-05	0.359198	-0.000263419	9.6094e-05
cg01755342	-3.91322e-05	5.30749e-05	0.462138	-0.000144058	6.57933e-05
cg15819352	8.9039e-06	8.86384e-05	0.920434	-0.000166328	0.000184136
cg06443644	-3.5256e-05	0.000102995	0.730343	-0.000238871	0.000168359
cg11549166	8.96067e-05	5.28333e-05	0.0954263	-1.48411e-05	0.000194055
cg22364929	1.48653e-06	0.000109657	0.989152	-0.000215297	0.000218271
cg05132306	-7.08266e-05	0.000150864	0.637556	-0.000369075	0.000227422
cg15715333	-6.6335e-05	7.46497e-05	0.382419	-0.000213912	8.12423e-05
cg17434257	-1.44798e-05	5.88349e-05	0.806909	-0.000130792	0.000101833
cg24188976	-3.05846e-06	6.68646e-05	0.963818	-0.000135245	0.000129128
cg12642568	-2.67243e-05	7.3011e-05	0.715264	-0.000171062	0.000117614
cg05995891	-9.49386e-05	4.69455e-05	0.043238	-0.000187747	-2.13058e-06
cg15527168	-0.000110558	5.54921e-05	0.0494142	-0.000220262	-8.5424e-07
cg17592667	4.18045e-05	5.20685e-05	0.427114	-6.11313e-05	0.00014474
cg03442254	-5.42007e-05	4.57374e-05	0.24724	-0.00014462	3.62189e-05
cg16989443	-4.04284e-05	2.63199e-05	0.124674	-9.24611e-05	1.16043e-05
cg07177011	-5.40098e-05	3.40422e-05	0.114576	-0.000121309	1.32893e-05
cg23473962	-3.62094e-05	8.31213e-05	0.666472	-0.000200535	0.000128116
cg22718050	-1.20566e-05	6.26203e-05	0.849266	-0.000135853	0.000111739
cg10943191	-5.42529e-05	3.62209e-05	0.138145	-0.000125859	1.73533e-05
cg22865286	-4.85413e-05	3.8575e-05	0.211967	-0.000124801	2.77188e-05
cg17091266	-4.83531e-06	2.91132e-05	0.870125	-6.239e-05	5.27194e-05
cg13680954	4.25311e-06	2.03783e-05	0.835927	-3.60335e-05	4.45397e-05
cg14180718	-1.15172e-05	1.20764e-05	0.343367	-3.53914e-05	1.23571e-05
cg20881128	7.02161e-06	1.47864e-05	0.640259	-2.22102e-05	3.62534e-05
cg08169659	-8.93783e-06	1.02033e-05	0.386929	-2.91091e-05	1.12335e-05
cg17722231	5.51252e-06	9.78156e-06	0.575662	-1.3825e-05	2.485e-05
cg22094750	-3.55768e-05	2.8351e-05	0.212185	-9.16248e-05	2.04711e-05
cg08134829	-5.5735e-06	1.13465e-05	0.624171	-2.80048e-05	1.68578e-05
cg25590392	-1.75278e-05	1.10725e-05	0.119483	-3.94174e-05	4.36172e-06
cg16632945	-9.14758e-05	6.22046e-05	0.144978	-0.00021445	3.14984e-05
cg10096055	1.85759e-05	3.71122e-05	0.618805	-5.47923e-05	9.19441e-05
cg02577049	2.53562e-05	5.4451e-05	0.643423	-8.22897e-05	0.000133002
cg04758387	-4.36278e-05	5.16379e-05	0.398193	-0.000145712	5.84567e-05
cg10219957	1.20348e-05	8.83278e-05	0.891789	-0.000162583	0.000186653
cg22536775	-0.000224828	8.08394e-05	0.00718476	-0.000384642	-6.5014e-05
cg09859491	5.97837e-07	3.78934e-05	0.987313	-7.43147e-05	7.55104e-05
cg06174563	2.17169e-05	5.15054e-05	0.676137	-8.01057e-05	0.00012354
cg01428437	-5.54212e-05	7.02672e-05	0.430965	-0.000194335	8.34921e-05
cg04886783	-0.000110543	6.46679e-05	0.0887817	-0.000238387	1.73009e-05
cg03580107	6.14811e-05	5.26892e-05	0.242703	-4.26818e-05	0.000165644
cg07924154	-4.90102e-05	9.24076e-05	0.596281	-0.000231694	0.000133673
cg03547078	-9.07536e-06	4.51805e-05	0.840451	-9.83942e-05	8.02434e-05
cg22447799	-1.32827e-05	4.97045e-05	0.788983	-0.000111545	8.49797e-05
cg19356311	-5.20808e-05	9.21125e-05	0.575717	-0.000234181	0.000130019
cg16328466	-8.81934e-05	4.81751e-05	0.0713798	-0.000183432	7.04544e-06
cg18231054	2.11646e-05	2.77695e-05	0.447092	-3.37337e-05	7.6063e-05
cg06092084	-8.9007e-05	8.54314e-05	0.297686	-0.000257899	7.9885e-05
cg11977488	3.68146e-05	8.00815e-05	0.642973	-0.000121501	0.00019513
cg26658617	-6.78076e-05	5.54702e-05	0.225993	-0.000177468	4.18532e-05
cg03719984	-0.000157784	8.59552e-05	0.0678751	-0.000327711	1.21437e-05
cg11649821	-1.70565e-05	4.74661e-05	0.717458	-0.000110894	7.67808e-05
cg17091049	1.34435e-05	5.26925e-05	0.798671	-9.07259e-05	0.000117613
cg07227679	-1.12709e-05	6.24397e-05	0.857298	-0.00013471	0.000112168
cg13027345	-3.43496e-05	5.18726e-05	0.514011	-0.000136898	6.8199e-05
cg19630039	-1.95843e-05	7.43513e-05	0.792985	-0.000166572	0.000127403
cg06082439	-3.00482e-05	4.40264e-05	0.495634	-0.000117085	5.6989e-05
cg08967668	2.64332e-06	8.01399e-05	0.974101	-0.000155788	0.000161074
cg06937595	-4.5666e-05	8.12086e-05	0.574653	-0.00020621	0.000114878
cg06853697	-6.37892e-05	7.21284e-05	0.374466	-0.000206382	7.88038e-05
cg11456906	-9.62272e-05	0.000157121	0.53959	-0.000406844	0.00021439
cg13707717	-2.41004e-05	6.08037e-05	0.694035	-0.000144305	9.61043e-05
cg18383977	2.2516e-05	3.97142e-05	0.572384	-5.59963e-05	0.000101028
cg08639799	-7.83626e-05	6.80003e-05	0.258618	-0.000212794	5.60692e-05
cg14559508	-2.58737e-05	3.07581e-05	0.399542	-8.66803e-05	3.49329e-05
cg16680704	-7.52483e-05	0.000151398	0.620129	-0.000374552	0.000224055
cg07484797	-7.05494e-05	6.4902e-05	0.28211	-0.000198856	5.77575e-05
cg24315049	-7.01475e-07	9.14634e-06	0.938171	-1.87832e-05	1.73802e-05
cg15833286	0.000186779	0.000105812	0.0801868	-2.24042e-05	0.000395963
cg16142957	-7.88083e-05	7.65577e-05	0.304566	-0.000230158	7.2541e-05
cg07719258	6.98627e-05	4.87242e-05	0.154662	-2.64618e-05	0.000166187
cg14839558	1.70273e-05	2.1609e-05	0.430387	-2.56922e-05	5.97467e-05
cg21876832	2.91568e-05	8.75147e-05	0.739511	-0.000143854	0.000202167
cg15028578	5.65346e-05	7.34348e-05	0.441081	-8.8641e-05	0.00020171
cg17747265	-0.00038111	0.000210742	0.0706225	-0.000797733	3.55124e-05
cg03396347	-0.000495656	0.000206079	0.0163521	-0.000903061	-8.82512e-05
cg19684894	-0.000465753	0.000229073	0.0428551	-0.000918614	-1.28922e-05
cg16573863	0.000152843	8.19309e-05	0.0661736	-9.12829e-06	0.000314815
cg24525340	-3.55118e-05	5.65493e-05	0.528855	-0.000147306	7.62823e-05
cg22375575	3.19254e-06	1.9852e-05	0.873256	-3.60535e-05	4.24386e-05
cg08730434	-4.64483e-05	7.07136e-05	0.511456	-0.000186244	9.33477e-05
cg26357403	1.63348e-05	0.000126074	0.898165	-0.000232904	0.000265574
cg22452682	-1.96663e-06	2.33277e-05	0.932903	-4.80839e-05	4.41507e-05
cg14661773	-3.4082e-06	1.76483e-05	0.848963	-3.82977e-05	3.14813e-05
cg22380385	-7.36317e-06	1.96753e-05	0.709616	-4.62599e-05	3.15335e-05
cg06090818	0.000103546	0.000124463	0.403128	-0.000142509	0.0003496
cg13111532	0.000226799	0.00021237	0.289041	-0.000193041	0.000646639
cg02825707	9.65406e-05	7.88022e-05	0.223247	-5.92459e-05	0.000252327
cg12035532	5.25327e-05	4.76738e-05	0.2753	-4.17152e-05	0.000146781
cg05264578	1.12969e-05	4.13973e-05	0.785883	-7.05427e-05	9.31365e-05
cg27304029	-0.000116207	8.19189e-05	0.160428	-0.000278155	4.5741e-05
cg12665890	-4.0576e-05	2.71661e-05	0.140522	-9.42815e-05	1.31295e-05
cg11528033	-3.54189e-06	3.19861e-05	0.912432	-6.67762e-05	5.96924e-05
cg11254952	-7.07287e-05	3.74293e-05	0.0642928	-0.000144724	3.26642e-06
cg22619719	-3.64946e-05	3.66949e-05	0.324893	-0.000109038	3.60486e-05
cg04851426	-5.29129e-05	0.000122354	0.671521	-0.000294798	0.000188972
cg10020121	-1.61289e-05	4.44233e-05	0.715845	-0.000103951	7.16929e-05
cg11956108	9.64836e-06	4.74268e-05	0.838847	-8.41111e-05	0.000103408
cg04395167	-9.24789e-06	6.79985e-05	0.89155	-0.000143676	0.000125181
cg05757448	-7.81043e-05	7.77704e-05	0.32037	-0.000231851	7.56425e-05
cg15151929	4.69255e-05	8.2261e-05	0.567048	-0.000115699	0.00020955
cg13168877	-4.06267e-06	7.09491e-05	0.954296	-0.000144324	0.000136199
cg14911597	-4.85294e-05	0.000110305	0.660204	-0.000266594	0.000169535
cg24503109	-0.000160167	9.32621e-05	0.0874271	-0.00034454	2.42056e-05
cg04852972	1.74343e-05	0.000108978	0.87315	-0.000198008	0.000232877
cg24495298	-4.64868e-05	8.19454e-05	0.5712	-0.000208487	0.000115514
cg23586413	-3.60692e-05	8.25516e-05	0.663427	-0.000199268	0.00012713
cg06123252	-1.76877e-05	9.53746e-05	0.852278	-0.000206237	0.000170861
cg14223474	1.9002e-05	0.00013937	0.891465	-0.000256524	0.000294528
cg04245726	-6.81949e-05	5.98837e-05	0.259074	-0.000186581	5.01911e-05
cg15546282	7.18995e-07	3.95625e-06	0.858955	-7.10225e-06	8.54024e-06
cg06835814	-5.84933e-05	0.000115044	0.614364	-0.000285927	0.00016894
cg07105421	1.02678e-07	1.61735e-05	0.995001	-3.18712e-05	3.20765e-05
cg26430560	-0.000107623	7.72744e-05	0.166015	-0.000260389	4.51431e-05
cg14598619	-3.45882e-05	2.6586e-05	0.195522	-8.71469e-05	1.79706e-05
cg00574213	-0.000204607	0.00013448	0.129158	-0.000470465	6.12518e-05
cg17016101	-4.78888e-05	7.21054e-05	0.510849	-0.000190436	9.46587e-05
cg01559650	-8.76001e-05	5.67479e-05	0.125861	-0.000199787	2.45866e-05
cg19694957	8.02724e-06	1.59154e-05	0.61588	-2.34364e-05	3.94909e-05
cg05035280	-2.80479e-05	0.000128017	0.826112	-0.000281128	0.000225032
cg16388674	5.69853e-06	1.06195e-05	0.591835	-1.52955e-05	2.66926e-05
cg04012515	-2.23563e-05	7.10737e-05	0.754165	-0.000162864	0.000118152
cg01748832	-4.57466e-05	4.75146e-05	0.338571	-0.00013968	4.81864e-05
cg27587063	-0.000159831	0.00011342	0.159775	-0.000384054	6.43927e-05
cg03678999	2.52801e-05	4.84821e-05	0.603308	-7.05657e-05	0.000121126
cg10623290	6.18158e-06	5.47399e-05	0.911922	-0.000102035	0.000114399
cg22792177	0.000135459	9.36412e-05	0.149913	-4.96632e-05	0.000320581
cg04624458	-4.57751e-05	3.64817e-05	0.21039	-0.000117897	2.63468e-05
cg10623802	3.11496e-05	0.000152901	0.836261	-0.000271125	0.000333424
cg18270426	7.33396e-05	0.00022342	0.740652	-0.000368347	0.000515026
cg12701697	-0.000135474	0.00012564	0.281316	-0.000383857	0.000112908
cg10331922	-5.83616e-07	1.9163e-05	0.975591	-3.84676e-05	3.73004e-05
cg15622118	-7.43315e-05	9.0457e-05	0.416904	-0.000253159	0.000104496
cg03771099	0.000109055	9.4629e-05	0.249054	-7.80195e-05	0.00029613
cg09121624	-9.95399e-05	7.58376e-05	0.191704	-0.000249466	5.03859e-05
cg14423423	-4.97988e-05	6.17091e-05	0.420431	-0.000171793	7.21959e-05
cg11946378	-5.1251e-05	0.000168681	0.766029	-0.000384723	0.000282221
cg25672268	-0.000104261	0.000117179	0.375085	-0.000335915	0.000127394
cg26424079	-3.93652e-05	2.67472e-05	0.140929	-9.22426e-05	1.35122e-05
cg00213113	2.75948e-05	4.13992e-05	0.504856	-5.42485e-05	0.000109438
cg17561553	1.19616e-05	2.77668e-05	0.668535	-4.29315e-05	6.68546e-05
cg22344830	-3.62694e-05	4.91363e-05	0.460144	-0.000133408	6.08696e-05
cg05700129	-2.97446e-05	1.86316e-05	0.111197	-6.6578e-05	7.08875e-06
cg26067203	-8.26097e-06	8.91654e-06	0.36311	-2.58884e-05	9.36642e-06
cg05551595	7.17739e-06	8.3303e-06	0.393811	-9.29105e-06	2.36458e-05
cg23621729	-5.3055e-06	2.42895e-05	0.82596	-5.33241e-05	4.27131e-05
cg08114317	-6.80011e-05	6.58521e-05	0.303571	-0.000198186	6.21839e-05
cg00014118	-0.000131355	0.00010613	0.215863	-0.000341166	7.8456e-05
cg16119405	-8.59963e-05	7.23949e-05	0.237986	-0.000229116	5.71235e-05
cg24317585	-3.2573e-05	9.11861e-05	0.720763	-0.000212842	0.000147696
cg23037871	-4.86504e-05	9.79109e-05	0.620415	-0.000242213	0.000144913
cg11983992	-1.05852e-05	2.3225e-05	0.645365	-5.64994e-05	3.53291e-05
cg14723606	0.000169916	0.00013252	0.200552	-9.20675e-05	0.000431899
cg06980013	-7.35534e-05	0.000137033	0.592536	-0.000344458	0.000197352
cg09021225	1.8446e-05	0.000241449	0.939382	-0.000458882	0.000495773
cg00546307	-0.000228224	0.000202033	0.263435	-0.00062763	0.000171181
cg13103143	-6.59933e-06	8.57255e-05	0.939086	-0.000176073	0.000162874
cg03443309	-0.000139365	0.000140922	0.324397	-0.000417957	0.000139228
cg13624878	-0.000138353	8.47803e-05	0.102531	-0.000305958	2.92516e-05
cg22735065	-4.31898e-05	0.00010117	0.673041	-0.000243195	0.000156816
cg15225282	-8.21873e-05	5.64608e-05	0.14749	-0.000193806	2.94319e-05
cg06236361	-1.51369e-05	2.05093e-05	0.45965	-5.56823e-05	2.54086e-05
cg19888246	5.76423e-05	9.22898e-05	0.531368	-0.000124808	0.000240093
cg18602963	-5.19027e-05	5.64845e-05	0.355785	-0.000163569	5.97633e-05
cg09709694	3.15713e-06	2.9215e-05	0.914313	-5.45989e-05	6.09132e-05
cg26609236	-9.26623e-05	4.20787e-05	0.0306345	-0.000175849	-9.47552e-06
cg17854471	-3.87409e-05	9.23529e-05	0.675208	-0.000221316	0.000143834
cg27059105	-4.37427e-05	0.000106645	0.681395	-0.000254572	0.000167087
cg24087944	-7.90204e-05	9.30821e-05	0.396143	-0.000263037	0.000104997
cg22817993	5.65516e-06	5.294e-05	0.91494	-9.90036e-05	0.000110314
cg09107007	1.97927e-05	1.30059e-05	0.13176	-5.91919e-06	4.55046e-05
cg11808581	1.50895e-05	1.18132e-05	0.203755	-8.26433e-06	3.84433e-05
cg05333723	-8.08723e-07	5.46389e-06	0.881867	-1.16105e-05	9.99302e-06
cg00580652	6.00307e-05	7.48137e-05	0.423937	-8.78708e-05	0.000207932
cg18392644	-0.000120294	8.70006e-05	0.16584	-0.000292288	5.17e-05
cg06063714	-8.26249e-05	6.98125e-05	0.237328	-0.000220639	5.53895e-05
cg15202351	-6.30486e-05	5.91684e-05	0.285813	-0.000180021	5.39233e-05
cg14974223	-4.65528e-05	8.58661e-05	0.586774	-0.000216304	0.000123199
cg03469790	-0.000119593	6.53427e-05	0.0676897	-0.000248771	9.58504e-06
cg19868751	-5.25906e-06	7.7538e-05	0.946058	-0.000158546	0.000148028
cg13788313	-0.000225491	7.16504e-05	0.00186421	-0.000367139	-8.3843e-05
cg15825127	-0.000125723	0.000121629	0.304513	-0.000366175	0.000114728
cg23288755	-5.70456e-05	8.86184e-05	0.526986	-0.000232238	0.000118147
cg24105782	8.1275e-05	8.14688e-05	0.318971	-7.97833e-05	0.000242333
cg04847273	-8.89296e-06	0.000103079	0.931174	-0.000212673	0.000194887
cg10837110	-2.61376e-05	9.91857e-05	0.799148	-0.000222221	0.000169946
cg05654059	-3.12087e-05	0.000106146	0.773342	-0.000241053	0.000178636
cg00400948	1.03597e-06	2.72008e-05	0.969816	-5.2738e-05	5.481e-05
cg19091116	-6.01768e-05	7.29885e-05	0.414548	-0.00020447	8.41165e-05
cg00889627	-0.000118004	9.07956e-05	0.201074	-0.000297501	6.14923e-05
cg04781796	-1.20508e-05	3.40484e-05	0.727632	-7.93621e-05	5.52606e-05
cg26903053	5.31435e-06	4.57108e-05	0.907334	-8.50527e-05	9.56814e-05
cg07701567	2.46282e-05	2.54969e-05	0.333933	-2.57774e-05	7.50338e-05
cg16467687	-9.64617e-06	5.64381e-05	0.864833	-0.00012122	0.000101928
cg25154424	1.1603e-05	1.35604e-05	0.391706	-1.5205e-05	3.84111e-05
cg11240722	-3.14387e-05	4.29255e-05	0.466101	-0.000116299	5.34221e-05
cg04417640	-7.75088e-05	5.446e-05	0.155834	-0.000185173	3.0155e-05
cg09769218	-8.15546e-05	6.58485e-05	0.21491	-0.000211733	4.86233e-05
cg24364910	1.35248e-05	5.10442e-05	0.791835	-8.7386e-05	0.000114436
cg25384089	-1.85942e-05	6.41557e-05	0.775544	-0.000145426	0.000108237
cg14522944	-3.1673e-05	0.000106549	0.765696	-0.000242314	0.000178967
cg03700143	-0.000117172	7.69561e-05	0.127076	-0.000269309	3.49651e-05
cg11687809	-2.48813e-05	9.65423e-05	0.796162	-0.000215739	0.000165976
cg24547253	0.000118271	0.000108432	0.283132	-9.60919e-05	0.000332633
cg14875852	-1.42254e-05	5.03168e-05	0.777775	-0.000113698	8.52476e-05
cg14087574	2.09207e-05	8.07574e-05	0.795361	-0.000138731	0.000180573
cg09752779	-0.000177349	6.59557e-05	0.00812539	-0.000307739	-4.69589e-05
cg13856872	-7.51314e-05	7.27625e-05	0.299403	-0.000218978	6.8715e-05
cg16650026	-2.11366e-05	3.01272e-05	0.477266	-8.06961e-05	3.84228e-05
cg08823892	-0.000119884	4.66955e-05	0.011447	-0.000212198	-2.75706e-05
cg00123471	-4.84618e-05	7.38209e-05	0.5087	-0.000194401	9.74772e-05
cg16992594	-6.86535e-05	6.54918e-05	0.29824	-0.000198126	6.08194e-05
cg07226484	4.0138e-05	5.84509e-05	0.494476	-7.54154e-05	0.000155691
cg04843461	-8.47449e-05	7.96726e-05	0.293335	-0.000242252	7.27624e-05
cg16703312	-5.71428e-05	8.28785e-05	0.488939	-0.000220988	0.000106702
cg12658400	-2.75184e-05	9.60686e-05	0.77974	-0.000217439	0.000162403
cg15198247	-1.49481e-05	0.000110478	0.893926	-0.000233355	0.000203459
cg15356494	-0.000145043	8.55455e-05	0.0937767	-0.000314161	2.40743e-05
cg09767587	-1.19888e-05	3.01624e-05	0.692961	-7.16177e-05	4.76401e-05
cg05597180	6.31043e-06	4.44202e-06	0.160341	-2.47115e-06	1.5092e-05
cg13298359	-2.96364e-06	5.05552e-06	0.563467	-1.2958e-05	7.03077e-06
cg10447260	5.37667e-05	0.000103509	0.602872	-0.000150864	0.000258397
cg14978994	-0.000192186	0.000122173	0.118897	-0.000433713	4.9342e-05
cg18120323	-0.00030543	0.000137087	0.0275665	-0.000576442	-3.44185e-05
cg10934589	-0.000115231	9.01522e-05	0.205279	-0.000293455	6.29938e-05
cg13646693	2.9274e-05	4.7211e-05	0.533557	-6.4059e-05	0.000122607
cg05239544	4.11859e-05	0.000108544	0.707277	-0.000173397	0.000255769
cg14417954	-9.83536e-05	0.000103487	0.343403	-0.000302941	0.000106234
cg26610624	-4.41374e-05	7.92653e-05	0.575656	-0.000200839	0.000112565
cg21137823	-9.17414e-05	7.60049e-05	0.231021	-0.000241998	5.85151e-05
cg03754143	3.77475e-06	8.1196e-06	0.644284	-1.22771e-05	1.98266e-05
cg03089488	-1.06638e-05	6.51721e-06	0.102425	-2.35479e-05	2.22022e-06
cg22865720	-1.39282e-05	3.67877e-05	0.705595	-8.6655e-05	5.87987e-05
cg24035370	8.7151e-06	2.43248e-05	0.72443	-3.93734e-05	5.68036e-05
cg19370684	-3.04095e-05	6.154e-05	0.628783	-0.00015207	9.12508e-05
cg02347356	-0.000175976	9.23785e-05	0.0622637	-0.000358602	6.65038e-06
cg05929117	-7.83406e-07	9.27172e-05	0.993361	-0.000184079	0.000182512
cg20285026	8.72189e-05	0.00010873	0.424892	-0.000127733	0.000302171
cg01907016	9.37065e-06	2.18776e-05	0.665625	-3.38798e-05	5.26211e-05
cg17740743	8.53514e-06	3.29271e-05	0.795873	-5.65595e-05	7.36298e-05
cg12391964	-1.66398e-05	1.25265e-05	0.186313	-4.1404e-05	8.12429e-06
cg23629792	-2.81336e-06	1.89991e-05	0.881672	-4.03733e-05	3.47466e-05
cg26059839	-1.5594e-05	3.41583e-05	0.646132	-8.31226e-05	5.19346e-05
cg14656575	-6.43033e-05	6.16008e-05	0.296406	-0.000186084	5.74773e-05
cg22627876	-2.81089e-05	3.41917e-05	0.410069	-9.57035e-05	3.94858e-05
cg06340969	-3.21776e-05	2.19119e-05	0.14308	-7.54958e-05	1.11406e-05
cg08115172	1.32727e-05	1.61354e-05	0.411495	-1.8626e-05	4.51713e-05
cg15502607	2.94299e-05	5.52142e-05	0.592814	-7.97248e-05	0.000138585
cg00653281	-8.3735e-06	1.91714e-05	0.661415	-4.62741e-05	2.95271e-05
cg19619416	4.08068e-05	4.34341e-05	0.347432	-4.50595e-05	0.000126673
cg24447775	-5.58783e-05	5.71329e-05	0.334051	-0.000168826	5.70696e-05
cg00328210	-1.74517e-05	4.77224e-05	0.717859	-0.000111796	7.68923e-05
cg15703790	-4.97939e-06	3.06861e-05	0.871994	-6.56438e-05	5.5685e-05
cg24475758	-1.89211e-05	4.1823e-05	0.655755	-0.000101602	6.37601e-05
cg03734700	-1.90063e-05	2.0776e-05	0.362587	-6.0079e-05	2.20664e-05
cg21221161	-9.92596e-06	2.13299e-05	0.642173	-5.20937e-05	3.22418e-05
cg19900677	4.05078e-05	5.05958e-05	0.419991	-5.95166e-05	0.000140532
cg26221719	-1.8932e-06	1.10902e-05	0.864641	-2.38177e-05	2.00313e-05
cg22332100	3.55945e-06	4.32865e-06	0.415509	-4.998e-06	1.21169e-05
cg02107558	-8.74634e-05	5.64246e-05	0.123599	-0.000199011	2.40841e-05
cg03377392	-1.15551e-05	5.68912e-05	0.840362	-0.000124025	0.000100915
cg04146995	6.41522e-05	5.34145e-05	0.229313	-4.14446e-05	0.000169749
cg11699150	8.72663e-06	3.06116e-05	0.778111	-5.17904e-05	6.92437e-05
cg19923417	6.41789e-06	1.11319e-05	0.565792	-1.55891e-05	2.84248e-05
cg15115072	2.10076e-05	7.4368e-05	0.778147	-0.000126013	0.000168028
cg11758127	3.48286e-05	9.40645e-05	0.71327	-0.00015113	0.000220788
cg17815669	-1.64882e-05	3.92108e-05	0.675481	-9.40052e-05	6.10288e-05
cg08108679	1.17942e-05	7.15326e-05	0.869496	-0.000129621	0.000153209
cg16269144	-5.1015e-05	3.37045e-05	0.129562	-0.000117646	1.56164e-05
cg04314111	2.55652e-05	7.60166e-05	0.735893	-0.000124714	0.000175845
cg22332339	-2.10092e-05	2.68371e-05	0.435963	-7.40643e-05	3.2046e-05
cg11227141	-9.53313e-05	7.16526e-05	0.183922	-0.000236984	4.63209e-05
cg00095688	-0.00012706	7.05855e-05	0.0727083	-0.000266603	1.24828e-05
cg24842354	6.36269e-05	0.00018772	0.732492	-0.000307483	0.000434736
cg08439149	-2.5852e-05	3.28764e-05	0.43062	-9.08465e-05	3.91424e-05
cg13077150	-2.22133e-05	4.27779e-05	0.606199	-0.000106782	6.23557e-05
cg00359465	-0.000107443	7.29756e-05	0.139239	-0.000251711	3.68244e-05
cg04023573	-0.000127071	8.10024e-05	0.117571	-0.000287207	3.30651e-05
cg08038080	-0.000129014	9.53331e-05	0.182137	-0.000317481	5.9453e-05
cg18352080	1.65839e-05	0.000180969	0.926215	-0.000341179	0.000374346
cg03959306	-0.000195779	0.000121753	0.109365	-0.000436476	4.49183e-05
cg25444428	-0.000101911	0.000103025	0.319774	-0.000305584	0.000101763
cg17318853	-6.96229e-06	0.00011143	0.950912	-0.000227252	0.000213327
cg04520340	-4.03011e-05	0.000134874	0.765494	-0.000306938	0.000226335
cg16653138	-5.62716e-05	7.30734e-05	0.43905	-0.000200733	8.81895e-05
cg18451382	-0.000170539	0.000124646	0.173569	-0.000416955	7.58782e-05
cg13387826	-7.9737e-06	0.000101229	0.937165	-0.000208096	0.000192149
cg24715732	8.88211e-05	0.000109822	0.420034	-0.00012829	0.000305932
cg06164957	-1.87163e-05	0.000102703	0.85538	-0.000221752	0.00018432
cg14418633	-0.000302781	0.000109176	0.00623106	-0.000518615	-8.69474e-05
cg03001333	-0.00020341	0.000155708	0.194171	-0.000511234	0.000104415
cg13591369	-6.64657e-06	8.11724e-05	0.934718	-0.000167119	0.000153826
cg27587033	-0.000253864	0.000169041	0.133032	-0.000588046	8.03187e-05
[truncated: 787,288+ more rows]
