# Supplementary material for: The association between neighborhood deprivation and DNA methylation in an autopsy cohort
Source: publisher site journal article supplement (doi:10.18632/aging.205764), 2024-04-24
Supplement: Supplementary file [file aging-v16i8-205764-supplementary-material-SD2.pdf]

## SUPPLEMENTARY TABLES

**Supplementary Table 1. Sample characteristics of the full ADRC cohort.**

| <b>Sample characteristic<br/>n (%) or mean [SD]</b> | <b>Total<br/>(n=1011)</b> |
|-----------------------------------------------------|---------------------------|
| <b>Demographics</b>                                 |                           |
| Race                                                |                           |
| White                                               | 808 (79.9)                |
| Black                                               | 68 (6.7)                  |
| Hawaiian                                            | 5 (0.5)                   |
| American Indian                                     | 1 (0.1)                   |
| NA                                                  | 129 (12.8)                |
| Sex                                                 |                           |
| Male                                                | 548 (54.2)                |
| Female                                              | 442 (43.7)                |
| NA                                                  | 21 (2.1)                  |
| Age at death                                        | 71.3 [13.0]               |
| Education attainment                                |                           |
| High school or less                                 | 103 (10.2)                |
| College degree                                      | 200 (19.8)                |
| Graduate degree                                     | 115 (11.4)                |
| NA                                                  | 593 (58.7)                |
| <b>Clinical variables</b>                           |                           |
| Braak Stage                                         |                           |
| Stage 0                                             | 86 (8.5)                  |
| Stage 1                                             | 88 (8.7)                  |
| Stage 2                                             | 111 (11.0)                |
| Stage 3                                             | 70 (6.9)                  |
| Stage 4                                             | 75 (7.4)                  |
| Stage 5                                             | 150 (14.8)                |
| Stage 6                                             | 298 (29.5)                |
| NA                                                  | 133 (13.2)                |
| CERAD                                               |                           |
| No                                                  | 294 (29.1)                |
| Sparse                                              | 29 (2.9)                  |
| Moderate                                            | 75 (7.4)                  |
| Frequent                                            | 542 (53.6)                |
| NA                                                  | 72 (7.1)                  |
| ABC                                                 |                           |
| Not                                                 | 161 (15.9)                |
| Low                                                 | 163 (16.1)                |
| Intermediate                                        | 110 (10.9)                |
| High                                                | 418 (41.3)                |
| NA                                                  | 159 (15.7)                |
| APOE ε4 Allele(s)                                   |                           |
| 0                                                   | 391 (38.7)                |
| 1                                                   | 318 (31.5)                |
| 2                                                   | 83 (8.2)                  |

|                          |            |
|--------------------------|------------|
| NA                       | 219 (21.7) |
| Cognitive classification |            |
| No dementia              | 24 (2.4)   |
| Other dementia           | 569 (56.3) |
| AD                       | 418 (41.3) |

**Supplementary Table 2. Top ten CpG sites from the EWAS of DNAm with the Area Deprivation Index (compare Figure 1 and Table 2).**

| CpG        | Chromosome | Position  | Gene(s)                                                                 | Main analysis (n=159) |            | Adjusted for CERAD (n=159) |              | Adjusted for ABC (n=159) |              | Adjusted for braak stage (n=159) |              |
|------------|------------|-----------|-------------------------------------------------------------------------|-----------------------|------------|----------------------------|--------------|--------------------------|--------------|----------------------------------|--------------|
|            |            |           |                                                                         | Effect estimate       | P-value    | Effect estimate            | P-value      | Effect estimate          | P-value      | Effect estimate                  | P-value      |
| cg26514961 | 12         | 94566784  | <i>PLXNC1</i>                                                           | -0.0052               | 0.00000005 | -0.0050                    | 0.0000000533 | -0.0053                  | 0.0000000498 | -0.0050                          | 0.0000000533 |
| cg08087060 | 16         | 87795808  | <i>KLHDC4</i>                                                           | -0.0040               | 0.00000057 | -0.0038                    | 0.000000592  | -0.0041                  | 0.000000562  | -0.0038                          | 0.000000592  |
| cg01291468 | 2          | 234589374 | <i>UGT1A10</i> ;<br><i>UGT1A7</i> ;<br><i>UGT1A9</i> ;<br><i>UGT1A8</i> | 0.0034                | 0.0000014  | 0.0034                     | 0.00000151   | 0.0035                   | 0.00000138   | 0.0034                           | 0.00000151   |
| cg05419854 | 17         | 19398395  | -                                                                       | -0.0058               | 0.0000018  | -0.0057                    | 0.0000019    | -0.0060                  | 0.00000175   | -0.0057                          | 0.0000019    |
| cg16241648 | 7          | 98923114  | <i>ARPC1A</i>                                                           | 0.0016                | 0.0000021  | 0.0013                     | 0.00000223   | 0.0016                   | 0.0000021    | 0.0013                           | 0.00000223   |
| cg20912923 | 8          | 2885516   | <i>CSMD1</i>                                                            | -0.0026               | 0.0000025  | -0.0024                    | 0.00000266   | -0.0027                  | 0.00000248   | -0.0024                          | 0.00000266   |
| cg15953452 | 3          | 63053400  | -                                                                       | -0.0050               | 0.0000025  | -0.0051                    | 0.0000025    | -0.0052                  | 0.00000247   | -0.0051                          | 0.0000025    |
| cg06787422 | 15         | 63331851  | -                                                                       | -0.0024               | 0.0000031  | -0.0025                    | 0.0000031    | -0.0025                  | 0.00000309   | -0.0025                          | 0.0000031    |
| cg13521319 | 9          | 133423844 | -                                                                       | -0.0018               | 0.0000034  | -0.0016                    | 0.00000341   | -0.0018                  | 0.0000034    | -0.0016                          | 0.00000341   |
| cg09431774 | 22         | 25465561  | <i>KIAA1671</i>                                                         | -0.0028               | 0.0000036  | -0.0026                    | 0.00000364   | -0.0029                  | 0.0000036    | -0.0026                          | 0.00000364   |

In this sensitivity analysis we additionally adjusted the EWAS of ADI for neuropathology markers (CERAD, ABC, Braak Stage) in separate models.

**Supplementary Table 3. Number of mQTLs mapped to the CpGs identified as the top ten CpG sites from the EWAS of ADI.**

| CpG        | Chromosome | Position  | # mQTLs identified at p<1e-14 (Min et al.) |
|------------|------------|-----------|--------------------------------------------|
| cg26514961 | 12         | 94566784  | 82                                         |
| cg08087060 | 16         | 87795808  | -                                          |
| cg01291468 | 2          | 234589374 | 187                                        |
| cg05419854 | 17         | 19398395  | -                                          |
| cg16241648 | 7          | 98923114  | -                                          |
| cg20912923 | 8          | 2885516   | -                                          |
| cg15953452 | 3          | 63053400  | -                                          |
| cg06787422 | 15         | 63331851  | 573                                        |
| cg13521319 | 9          | 133423844 | -                                          |
| cg09431774 | 22         | 25465561  | -                                          |
