# Supplementary material for: The association between neighborhood deprivation and DNA methylation in an autopsy cohort
Source: publisher site journal article supplement (doi:10.18632/aging.205764), 2024-04-24
Supplement: Supplementary file [file aging-v16i8-205764-supplementary-material-SD4.pdf]

**Supplementary Table 5A. GO terms that were nominally significant (p<0.05) for the top ten CpG sites from the EWAS of ADI.**

|            | Ontology | Term                                                                                        | N genes in term | N differentially methylated genes | P-value              | FDR |
|------------|----------|---------------------------------------------------------------------------------------------|-----------------|-----------------------------------|----------------------|-----|
| GO:0036194 | CC       | muscle cell projection                                                                      | 3               | 1                                 | 0.000502345421245922 | 1   |
| GO:0036195 | CC       | muscle cell projection membrane                                                             | 3               | 1                                 | 0.000502345421245922 | 1   |
| GO:0051552 | BP       | flavone metabolic process                                                                   | 6               | 1                                 | 0.00241426466775728  | 1   |
| GO:0005885 | CC       | Arp2/3 protein complex                                                                      | 11              | 1                                 | 0.00354560747835619  | 1   |
| GO:0052696 | BP       | flavonoid glucuronidation                                                                   | 9               | 1                                 | 0.00390423191457027  | 1   |
| GO:0052697 | BP       | xenobiotic glucuronidation                                                                  | 10              | 1                                 | 0.00411590769484143  | 1   |
| GO:1902287 | BP       | semaphorin-plexin signaling pathway involved in axon guidance                               | 10              | 1                                 | 0.00436272584402716  | 1   |
| GO:0002116 | CC       | semaphorin receptor complex                                                                 | 9               | 1                                 | 0.00449002681942201  | 1   |
| GO:0017154 | MF       | semaphorin receptor activity                                                                | 10              | 1                                 | 0.00458158214874175  | 1   |
| GO:1902285 | BP       | semaphorin-plexin signaling pathway involved in neuron projection guidance                  | 11              | 1                                 | 0.00487691928380841  | 1   |
| GO:0009812 | BP       | flavonoid metabolic process                                                                 | 14              | 1                                 | 0.00573835688276425  | 1   |
| GO:0052695 | BP       | cellular glucuronidation                                                                    | 17              | 1                                 | 0.00652996834768369  | 1   |
| GO:0006063 | BP       | uronic acid metabolic process                                                               | 22              | 1                                 | 0.00829958662418977  | 1   |
| GO:0019585 | BP       | glucuronate metabolic process                                                               | 22              | 1                                 | 0.00829958662418977  | 1   |
| GO:0001964 | BP       | startle response                                                                            | 27              | 1                                 | 0.0105784447630494   | 1   |
| GO:0015020 | MF       | glucuronosyltransferase activity                                                            | 30              | 1                                 | 0.0118114852718722   | 1   |
| GO:0034314 | BP       | Arp2/3 complex-mediated actin nucleation                                                    | 37              | 1                                 | 0.0130563075770592   | 1   |
| GO:0071526 | BP       | semaphorin-plexin signaling pathway                                                         | 37              | 1                                 | 0.0141622932961172   | 1   |
| GO:0045010 | BP       | actin nucleation                                                                            | 50              | 1                                 | 0.0177133195926246   | 1   |
| GO:0035861 | CC       | site of double-strand break                                                                 | 58              | 1                                 | 0.0194649272443375   | 1   |
| GO:0042440 | BP       | pigment metabolic process                                                                   | 66              | 1                                 | 0.0238803078794503   | 1   |
| GO:0002433 | BP       | immune response-regulating cell surface receptor signaling pathway involved in phagocytosis | 77              | 1                                 | 0.0261103192117255   | 1   |
| GO:0038096 | BP       | Fc-gamma receptor signaling pathway involved in phagocytosis                                | 77              | 1                                 | 0.0261103192117255   | 1   |
| GO:0090734 | CC       | site of DNA damage                                                                          | 79              | 1                                 | 0.0261634735240811   | 1   |
| GO:0038094 | BP       | Fc-gamma receptor signaling pathway                                                         | 80              | 1                                 | 0.0276743567107917   | 1   |
| GO:0002431 | BP       | Fc receptor mediated stimulatory signaling pathway                                          | 83              | 1                                 | 0.0281054046566517   | 1   |
| GO:0050772 | BP       | positive regulation of axonogenesis                                                         | 79              | 1                                 | 0.0287765616463737   | 1   |
| GO:0048013 | BP       | ephrin receptor signaling pathway                                                           | 85              | 1                                 | 0.0294559296346882   | 1   |
| GO:0030838 | BP       | positive regulation of actin filament polymerization                                        | 98              | 1                                 | 0.0349750533314372   | 1   |
| GO:0050905 | BP       | neuromuscular process                                                                       | 106             | 1                                 | 0.0387299038011777   | 1   |
| GO:0006805 | BP       | xenobiotic metabolic process                                                                | 112             | 1                                 | 0.0426557934218213   | 1   |
| GO:0071466 | BP       | cellular response to xenobiotic stimulus                                                    | 117             | 1                                 | 0.0441801450153952   | 1   |
| GO:0032273 | BP       | positive regulation of protein polymerization                                               | 133             | 1                                 | 0.0461578372736143   | 1   |
| GO:0009410 | BP       | response to xenobiotic stimulus                                                             | 124             | 1                                 | 0.0466060117650619   | 1   |
| GO:0008194 | MF       | UDP-glycosyltransferase activity                                                            | 134             | 1                                 | 0.0477513908349988   | 1   |

**Supplementary Table 5B. Top KEGG pathways for the top ten CpG sites from the EWAS of ADI.**

|               | Term                                         | N genes in term | N differentially methylated genes | P-value             | FDR               |
|---------------|----------------------------------------------|-----------------|-----------------------------------|---------------------|-------------------|
| path:hsa00053 | Ascorbate and aldarate metabolism            | 27              | 1                                 | 0.00935562323527538 | 0.94649073173396  |
| path:hsa00040 | Pentose and glucuronate interconversions     | 32              | 1                                 | 0.0112598177301082  | 0.94649073173396  |
| path:hsa00860 | Porphyrin metabolism                         | 38              | 1                                 | 0.0136467852899198  | 0.94649073173396  |
| path:hsa00140 | Steroid hormone biosynthesis                 | 58              | 1                                 | 0.0207101214494628  | 0.94649073173396  |
| path:hsa00830 | Retinol metabolism                           | 61              | 1                                 | 0.0224058341419214  | 0.94649073173396  |
| path:hsa00982 | Drug metabolism - cytochrome P450            | 65              | 1                                 | 0.0233265428658444  | 0.94649073173396  |
| path:hsa05204 | Chemical carcinogenesis - DNA adducts        | 63              | 1                                 | 0.0239040038630032  | 0.94649073173396  |
| path:hsa05100 | Bacterial invasion of epithelial cells       | 76              | 1                                 | 0.0266674544457237  | 0.94649073173396  |
| path:hsa00983 | Drug metabolism - other enzymes              | 76              | 1                                 | 0.0268464761287482  | 0.94649073173396  |
| path:hsa00980 | Metabolism of xenobiotics by cytochrome P450 | 73              | 1                                 | 0.026888941242442   | 0.94649073173396  |
| path:hsa04666 | Fc gamma R-mediated phagocytosis             | 94              | 1                                 | 0.0300734939977411  | 0.950116909157175 |
| path:hsa04976 | Bile secretion                               | 86              | 1                                 | 0.0323903491758128  | 0.950116909157175 |
| path:hsa05135 | Yersinia infection                           | 129             | 1                                 | 0.0423779846739126  | 1                 |

**Supplementary Table 6. CpG sites from the EWAS of ADI that were statistically significant in Lawrence et al. (2020).**

| CpG        | Our study             |         | Lawrence et al. (2020) |              |
|------------|-----------------------|---------|------------------------|--------------|
|            | Effect estimate       | P-value | Effect estimate        | P-value      |
| cg23538773 | 0.0000271             | 0.773   | 0.002352               | 0.0000000198 |
| cg07390373 | 0.0000374             | 0.683   | 0.001854               | 0.0000000971 |
| cg18956825 | 0.0000853185179635161 | 0.654   | -0.00233               | 0.000000275  |

**Supplementary Table 7. Top ten CpG sites from the EWAS of DNAm with the Area Deprivation Index (compare Figure 1 and Table 2).**

| CpG        | Chromosome | Position  | Gene(s)                                | Main analysis (n=159) |            | Excluding cognitively normal donors (n=152) |            |
|------------|------------|-----------|----------------------------------------|-----------------------|------------|---------------------------------------------|------------|
|            |            |           |                                        | Effect estimate       | P-value    | Effect estimate                             | P-value    |
| cg26514961 | 12         | 94566784  | <i>PLXNC1</i>                          | -0.0052               | 0.00000005 | -0.005                                      | 0.00000004 |
| cg08087060 | 16         | 87795808  | <i>KLHDC4</i>                          | -0.004                | 0.00000057 | -0.0039                                     | 0.00000055 |
| cg01291468 | 2          | 234589374 | <i>UGT1A10; UGT1A7; UGT1A9; UGT1A8</i> | 0.0034                | 0.0000014  | 0.0032                                      | 0.0000013  |
| cg05419854 | 17         | 19398395  | -                                      | -0.0058               | 0.0000018  | -0.0056                                     | 0.0000014  |
| cg16241648 | 7          | 98923114  | <i>ARPC1A</i>                          | 0.0016                | 0.0000021  | 0.0016                                      | 0.0000019  |
| cg20912923 | 8          | 2885516   | <i>CSMD1</i>                           | -0.0026               | 0.0000025  | -0.0024                                     | 0.0000023  |
| cg15953452 | 3          | 63053400  | -                                      | -0.005                | 0.0000025  | -0.0048                                     | 0.0000023  |
| cg06787422 | 15         | 63331851  | -                                      | -0.0024               | 0.0000031  | -0.0024                                     | 0.0000029  |
| cg13521319 | 9          | 133423844 | -                                      | -0.0018               | 0.0000034  | -0.0017                                     | 0.0000033  |
| cg09431774 | 22         | 25465561  | <i>KIAA1671</i>                        | -0.0028               | 0.0000036  | -0.0025                                     | 0.0000034  |

In this sensitivity analysis we excluded the 2.5% cognitively normal donors.

**Supplementary Table 8. Sample characteristics of the full ADRC cohort compared to the analysis sample.**

| Sample characteristic     | Total<br>(full cohort) |              | Samples not<br>included in the<br>analysis |         | Analysis sample |        | P-Value |
|---------------------------|------------------------|--------------|--------------------------------------------|---------|-----------------|--------|---------|
|                           | n (%)                  | or mean [SD] | (n=1011)                                   | (n=852) | (n=159)         |        |         |
| <b>Demographics</b>       |                        |              |                                            |         |                 |        |         |
| Race                      |                        |              |                                            |         |                 |        | 0.42    |
| White                     | 808                    | (79.9)       | 666                                        | (78.2)  | 142             | (89.3) |         |
| Black                     | 68                     | (6.7)        | 51                                         | (6.0)   | 17              | (10.7) |         |
| Hawaiian                  | 5                      | (0.5)        | 5                                          | (0.1)   | 0               | (0.0)  |         |
| American Indian           | 1                      | (0.1)        | 1                                          | (0.0)   | 0               | (0.0)  |         |
| NA                        | 129                    | (12.8)       | 129                                        | (15.1)  | 0               | (0.0)  |         |
| Sex                       |                        |              |                                            |         |                 |        | 0.83    |
| Male                      | 548                    | (54.2)       | 459                                        | (53.9)  | 89              | (56.0) |         |
| Female                    | 442                    | (43.7)       | 372                                        | (43.7)  | 70              | (44.0) |         |
| NA                        | 21                     | (2.1)        | 21                                         | (2.5)   | 0               | (0.0)  |         |
| Age at death              | 71.3                   | [13.0]       | 69.7                                       | [8.2]   | 76.6            | [10.0] | 0.54    |
| Education attainment      |                        |              |                                            |         |                 |        | 0.46    |
| High school or less       | 103                    | (10.2)       | 67                                         | (7.9)   | 36              | (22.6) |         |
| College degree            | 200                    | (19.8)       | 124                                        | (14.6)  | 76              | (47.8) |         |
| Graduate degree           | 115                    | (11.4)       | 68                                         | (8.0)   | 47              | (29.6) |         |
| NA                        | 593                    | (58.7)       | 593                                        | (69.6)  | 0               | (0.0)  |         |
| <b>Clinical variables</b> |                        |              |                                            |         |                 |        |         |
| Braak Stage               |                        |              |                                            |         |                 |        | 0.41    |
| Stage 0                   | 86                     | (8.5)        | 86                                         | (10.1)  | 0               | (0.0)  |         |
| Stage 1                   | 88                     | (8.7)        | 72                                         | (8.5)   | 16              | (10.1) |         |
| Stage 2                   | 111                    | (11.0)       | 100                                        | (11.7)  | 11              | (6.9)  |         |
| Stage 3                   | 70                     | (6.9)        | 50                                         | (5.9)   | 20              | (12.6) |         |
| Stage 4                   | 75                     | (7.4)        | 58                                         | (6.8)   | 17              | (10.7) |         |
| Stage 5                   | 150                    | (14.8)       | 128                                        | (15.0)  | 22              | (13.8) |         |
| Stage 6                   | 298                    | (29.5)       | 225                                        | (26.4)  | 73              | (45.9) |         |
| NA                        | 133                    | (13.2)       | 133                                        | (15.6)  | 0               | (0.0)  |         |
| CERAD                     |                        |              |                                            |         |                 |        | 0.64    |
| No                        | 294                    | (29.1)       | 259                                        | (30.4)  | 35              | (22.0) |         |
| Sparse                    | 29                     | (2.9)        | 25                                         | (2.9)   | 4               | (2.5)  |         |
| Moderate                  | 75                     | (7.4)        | 65                                         | (7.6)   | 10              | (6.3)  |         |
| Frequent                  | 542                    | (53.6)       | 432                                        | (50.7)  | 110             | (69.2) |         |
| NA                        | 72                     | (7.1)        | 72                                         | (8.5)   | 0               | (0.0)  |         |
| ABC                       |                        |              |                                            |         |                 |        | 0.67    |
| Not                       | 161                    | (15.9)       | 146                                        | (17.1)  | 15              | (9.4)  |         |
| Low                       | 163                    | (16.1)       | 134                                        | (15.7)  | 29              | (18.2) |         |
| Intermediate              | 110                    | (10.9)       | 88                                         | (10.3)  | 22              | (13.8) |         |
| High                      | 418                    | (41.3)       | 325                                        | (38.1)  | 93              | (58.5) |         |
| NA                        | 159                    | (15.7)       | 159                                        | (18.7)  | 0               | (0.0)  |         |
| APOE ε4 Allele(s)         |                        |              |                                            |         |                 |        | 0.31    |
| 0                         | 391                    | (38.7)       | 321                                        | (37.7)  | 70              | (44.0) |         |
| 1                         | 318                    | (31.5)       | 250                                        | (29.3)  | 68              | (42.8) |         |
| 2                         | 83                     | (8.2)        | 62                                         | (7.3)   | 21              | (13.2) |         |
| NA                        | 219                    | (21.7)       | 219                                        | (25.7)  | 0               | (0.0)  |         |

|                          |     |        |     |        |    |        |
|--------------------------|-----|--------|-----|--------|----|--------|
| Cognitive classification |     |        |     |        |    | 0.44   |
| No dementia              | 24  | (2.4)  | 17  | (2.0)  | 7  | (4.4)  |
| Other dementia           | 569 | (56.3) | 503 | (59.0) | 66 | (41.5) |
| AD                       | 418 | (41.3) | 332 | (39.0) | 86 | (54.2) |

Missing values (NA) included for descriptive purpose only; group comparison was done for complete cases.

**Supplementary Table 9. Top 25 CpG sites from the EWAS of ADI that were statistically significant for Alzheimer’s disease in the Smith et al. (2021) meta-analysis.**

| CpG        | Our study             |         | Smith et al. (2021) |          |
|------------|-----------------------|---------|---------------------|----------|
|            | Effect estimate       | P-value | Effect estimate     | P-value  |
| cg12307200 | 0.0000105             | 0.90    | -0.015              | 4.48E-16 |
| cg01419713 | -0.000139595367796947 | 0.51    | 0.022               | 2.20E-14 |
| cg04874795 | 0.000082              | 0.66    | -0.022              | 3.95E-14 |
| cg11823178 | 0.0000133             | 0.94    | 0.016               | 3.24E-13 |
| cg07061298 | -0.0000388            | 0.77    | 0.018               | 4.57E-13 |
| cg13076843 | -0.000075             | 0.52    | 0.021               | 7.57E-13 |
| cg25018458 | -0.0000111            | 0.64    | 0.008               | 7.87E-13 |
| cg07883124 | 0.0000109             | 0.92    | 0.017               | 9.10E-13 |
| cg03223072 | 0.0000524             | 0.70    | -0.014              | 1.10E-12 |
| cg05066959 | 0.0000104             | 0.90    | 0.024               | 1.45E-12 |
| cg17881200 | -0.00267337           | 0.02    | 0.017               | 1.83E-12 |
| cg19240213 | -0.000110791          | 0.48    | 0.02                | 2.29E-12 |
| cg10045881 | -0.000110486          | 0.35    | -0.015              | 2.38E-12 |
| cg02674693 | 0.00000358            | 0.98    | 0.018               | 3.57E-12 |
| cg06800235 | -0.0000166            | 0.92    | -0.017              | 3.71E-12 |
| cg18264562 | -0.000294621          | 0.12    | 0.014               | 5.46E-12 |
| cg01964852 | 0.0000629             | 0.58    | 0.016               | 5.96E-12 |
| cg01111041 | -0.000056             | 0.11    | 0.009               | 6.83E-12 |
| cg15974867 | -0.000101198          | 0.15    | 0.018               | 7.46E-12 |
| cg17907520 | -0.0000942            | 0.13    | 0.011               | 9.65E-12 |
| cg16988611 | -0.0000406            | 0.69    | 0.011               | 9.98E-12 |
| cg13579486 | -0.0000288            | 0.76    | -0.012              | 1.01E-11 |
| cg01681367 | 0.0000329             | 0.83    | -0.015              | 1.25E-11 |
| cg01301319 | -0.0000516            | 0.74    | 0.017               | 1.54E-11 |
| cg02317313 | -0.000024             | 0.85    | 0.017               | 1.69E-11 |

**Supplementary Table 10. Top 10 regions from the regional EWAS of ADI using the dmrff R Package.**

| <b>Chromosome</b> | <b>Start</b> | <b>End</b> | <b>Effect estimate</b> | <b>P-value (bonferroni-adjusted)</b> |
|-------------------|--------------|------------|------------------------|--------------------------------------|
| 12                | 18046784     | 18050274   | -0.011                 | 3.93E-4                              |
| 12                | 16849738     | 16858357   | 0.053                  | 4.27E-4                              |
| 9                 | 11029484     | 11038264   | -0.044                 | 4.88E-4                              |
| 7                 | 14048948     | 14053843   | 0.062                  | 5.33E-4                              |
| 2                 | 10394855     | 10399273   | 0.083                  | 5.53E-4                              |
| 8                 | 20483933     | 20489055   | -0.092                 | 8.09E-4                              |
| 3                 | 12048391     | 12059282   | 0.072                  | 8.20E-4                              |
| 6                 | 32031809     | 32037018   | 0.082                  | 8.64E-4                              |
| 6                 | 30682805     | 30693326   | -0.095                 | 8.94E-4                              |
| 6                 | 31904765     | 31909284   | -0.102                 | 8.99E-4                              |
