# Supplementary material for: The association between neighborhood deprivation and DNA methylation in an autopsy cohort
Source: Aging (Albany NY). 2024 Apr 24;16(8):6694–716. doi: 10.18632/aging.205764 (PMC11087100; doi:10.18632/aging.205764)
Supplement: Supplementary Table 4 [file aging-16-205764-s003.xlsx]

## Sheet: Table S4a
Supplementary Table 4A. BECon Blood-Brain Epigenetic Concordance for CpGs identified as the top ten CpG sites from the EWAS of ADI.
CpG	Chromosome	Position	Associated Genes	CpG in Feature of Gene, respectively	Cor Blood-BA7	Cor Blood- BA10	Cor Blood- BA20	Mean Cor All Brain	SD Mean Cor All Brain	Percentile of Mean Cor All Brain (positive)	Percentile of Mean Cor All Brain (negative)	Mean Change Beta with Blood Cell Composition Normalization	Mean Change Beta with Brain Cell Composition Normalization	Percentile rank of CpG Change Beta with Blood Cell Comp	Percentile rank of CpG Change Beta with Brain Cell Comp	Var in Blood	Var in All Brain	Var in BA7	Var in BA10	Var in BA20
cg26514961	12	94566784	PLXNC1	intragenic	0.211765	0.0441176	-0.0941176	0.0539216	0.153177	<50%	-	0.13	0	90% (Blood Cell Comp.)	<50% (Brain Cell Comp.)	0.414844	0.0651138	0.0550339	0.0726753	0.0425597
cg08087060	16	87795808	KLHDC4
cg01291468	2	234589374	UGT1A10, UGT1A8, UGT1A9, UGT1A7	intragenic, intragenic, intragenic, promoter	-0.0352941	0.0205882	-0.164706	-0.0598039	0.0950475	-	<50%	0	0	<50% (Blood Cell Comp.)	50-75% (Brain Cell Comp.)	0.0258839	0.0371897	0.026716	0.0470269	0.0339395
cg05419854	17	19398395	None	intergenic	-0.0735294	0.126471	-0.0294118	0.00784314	0.105076	<50%	-	0.01	0.01	50-75% (Blood Cell Comp.)	50-75% (Brain Cell Comp.)	0.0565437	0.0558077	0.0553082	0.0463074	0.0538056
cg16241648	7	98923114	ARPC1A	promoter	-0.1	-0.0382353	0.226471	0.0294118	0.17343	<50%	-	0	0	<50% (Blood Cell Comp.)	<50% (Brain Cell Comp.)	0.00914679	0.0101986	0.00957208	0.00885297	0.0100504
cg20912923	8	2885516	CSMD1	intragenic	-0.0352941	-0.6	-0.141176	-0.258824	0.300173	-	75-90%	0.01	0	<50% (Blood Cell Comp.)	<50% (Brain Cell Comp.)	0.0338188	0.0229041	0.0214912	0.0226438	0.0144935
cg15953452	3	63053400
cg06787422	15	63331851	None	intergenic	-0.126471	-0.25	-0.341176	-0.239216	0.107758	-	75-90%	0.03	0	75-90% (Blood Cell Comp.)	<50% (Brain Cell Comp.)	0.0949297	0.0266061	0.0246661	0.0210864	0.0232283
cg13521319	9	133423844
cg09431774	22	25465561	KIAA1671
																Green: Variability of DNAm above threshold of 0.05
CpG	Percentile of Mean Cor All Brain (positive)	Percentile of Mean Cor All Brain (negative)	Mean Change Beta with Blood Cell Composition Normalization	Mean Change Beta with Brain Cell Composition Normalization	Percentile rank of CpG Change Beta with Blood Cell Comp	Percentile rank of CpG Change Beta with Brain Cell Comp	Var in Blood	Var in All Brain	Var in BA7	Var in BA10	Var in BA20
cg26514961	<50%	-	0.13	0	90% (Blood Cell Comp.)	<50% (Brain Cell Comp.)	0.414844	0.0651138	0.0550339	0.0726753	0.0425597
cg08087060
cg01291468	-	<50%	0	0	<50% (Blood Cell Comp.)	50-75% (Brain Cell Comp.)	0.0258839	0.0371897	0.026716	0.0470269	0.0339395
cg05419854	<50%	-	0.01	0.01	50-75% (Blood Cell Comp.)	50-75% (Brain Cell Comp.)	0.0565437	0.0558077	0.0553082	0.0463074	0.0538056
cg16241648	<50%	-	0	0	<50% (Blood Cell Comp.)	<50% (Brain Cell Comp.)	0.00914679	0.0101986	0.00957208	0.00885297	0.0100504
cg20912923	-	75-90%	0.01	0	<50% (Blood Cell Comp.)	<50% (Brain Cell Comp.)	0.0338188	0.0229041	0.0214912	0.0226438	0.0144935
cg15953452
cg06787422	-	75-90%	0.03	0	75-90% (Blood Cell Comp.)	<50% (Brain Cell Comp.)	0.0949297	0.0266061	0.0246661	0.0210864	0.0232283
cg13521319
cg09431774

## Sheet: Table S4b
Supplementary Table 4B. Blood-Brain, Buccal-Brain, and Saliva-Brain Epigenetic Concordance for CpGs identified as the top ten CpG sites from the EWAS of ADI.
CpG	Blood Correlation	Blood P-Value	Buccal Correlation	Buccal P-Value	Saliva Correlation	Saliva P-Value
cg26514961	0.255844	0.261804	-0.533766	0.0139252	-0.587013	0.00600332
cg08087060	0.214286	0.349319	-0.12987	0.573397	-0.385714	0.0851054
cg01291468	-0.0974026	0.673741	0.11039	0.632817	0.074026	0.749676
cg05419854	0.376623	0.0932078	0.309091	0.172484	-0.0883117	0.702948
cg16241648	-0.331169	0.142632	0.492208	0.0248237	0.480519	0.0288919
cg20912923	0.00909091	0.970747	0.332468	0.141001	-0.074026	0.749676
cg15953452	0.58961	0.00574282	-0.257143	0.259323	0.485714	0.0270224
cg06787422	0.12987	0.573397	-0.0337662	0.885586	0.519481	0.0171075
cg13521319	-0.101299	0.661361	0.274026	0.228463	-0.216883	0.343389
cg09431774	0.22987	0.314657	0.0103896	0.966249	-0.0909091	0.694558
	4b
